# Supplementary material for: DFT studies on the mechanism of alcohol oxidation by the (bpy)CuI-TEMPO/NMI catalytic system
Source: Royal Society of Chemistry journal article supplement (doi:10.1039/c4dt03051f), 2015-01-01
Supplement: c4dt03051f1.pdf [file c4dt03051f1.pdf]

## Supporting information

### **DFT studies on the mechanism of alcohol oxidation by (bpy)Cu<sup>I</sup>-TEMPO/NMI catalytic system**

**Lin Cheng,<sup>\*a</sup> Jie Li,<sup>b</sup> Qiancheng Zhang,<sup>a</sup> Lisha Ma,<sup>a</sup> Jucai Yang,<sup>a</sup>**

<sup>a</sup>*Key Laboratory of Industrial Catalysis of the Inner Mongolia Autonomous Region, Inner Mongolia University of Technology, Huhhot 010051, China. Email: [lcheng1983@aliyun.com](mailto:lcheng1983@aliyun.com)*

<sup>b</sup>*Department of Materials Science and Engineering, Inner Mongolia University of Technology, Huhhot 010051, China*

**Table S1** Cartesian coordinates all structures considered in this work (B3LYP level)

|                                        |                                        |
|----------------------------------------|----------------------------------------|
| <b>0</b><br>Charge=1 Multiplicity = 1  | <b>0</b><br>Charge=1 Multiplicity = 3  |
| Cu -0.00001200 1.42799300 -0.00116500  | Cu -0.00173800 1.42825200 -0.00037700  |
| N -1.31256800 -0.00050200 -0.00084500  | N -1.31524100 -0.00077300 -0.00081900  |
| N 1.31257000 -0.00048000 -0.00083400   | N 1.31564800 0.00303300 0.00011700     |
| C -1.53295400 -2.38197900 0.00093700   | C -1.52702600 -2.38357000 0.00065600   |
| C -0.74314900 -1.23388000 0.00008400   | C -0.74153000 -1.23227300 -0.00003800  |
| C -3.49366700 -0.98063200 -0.00024600  | C -3.49304000 -0.99063100 -0.00017300  |
| H -3.54965800 -3.13793900 0.00143000   | H -3.54040900 -3.14825000 0.00113600   |
| H -3.03510900 1.13950500 -0.00176000   | H -3.04346000 1.13057800 -0.00143700   |
| H -4.56880800 -0.84053800 -0.00041500  | H -4.56871000 -0.85459900 -0.00022700  |
| H -1.08119200 -3.36678000 0.00172700   | H -1.07161200 -3.36664600 0.00131500   |
| H 3.54971000 -3.13788300 0.00143600    | H 3.54981000 -3.13809400 -0.00003500   |
| C 2.92270200 -2.25182200 0.00077600    | C 2.92399400 -2.25118900 0.00001400    |
| C 3.49368500 -0.98057700 -0.00023200   | C 3.49627700 -0.98061700 0.00013300    |
| C 1.53299500 -2.38195400 0.00093700    | C 1.53425100 -2.37916400 -0.00006700   |
| C 2.64869000 0.12545600 -0.00101200    | C 2.65217600 0.12603200 0.00013000     |
| H 4.56882400 -0.84046500 -0.00039600   | H 4.57155500 -0.84152100 0.00019500    |
| C 0.74317200 -1.23386800 0.00008600    | C 0.74545500 -1.23012500 -0.00000700   |
| H 1.08124800 -3.36676300 0.00171800    | H 1.08159400 -3.36350400 -0.00025300   |
| C -2.92266300 -2.25186700 0.00077000   | C -2.91713100 -2.25956100 0.00058400   |
| H 3.03509500 1.13955300 -0.00174300    | H 3.04067100 1.13928200 0.00018700     |
| C -2.64869000 0.12541400 -0.00102500   | C -2.65209700 0.11843100 -0.00082400   |
| O 0.66006400 3.23004400 0.00223300     | O 0.65014100 3.23836000 -0.00062200    |
| O -0.66012500 3.23003400 0.00240200    | O -0.66262400 3.23459400 0.00218700    |
| <b>1</b><br>Charge=1 Multiplicity = 1  | <b>1</b><br>Charge=1 Multiplicity = 3  |
| Cu -0.80801200 -0.78586600 -0.42017400 | Cu -0.78461700 -0.80566800 -0.35718500 |
| N -2.66620800 -0.66070300 0.15258100   | N -2.68033700 -0.65360700 0.15684200   |
| N -0.90349900 1.18720500 -0.39407800   | N -0.88050100 1.17594000 -0.38146800   |
| C -4.43618500 0.85506000 0.68194900    | C -4.44572000 0.89680700 0.60115500    |
| C -3.12099500 0.60965300 0.29220800    | C -3.12291400 0.62433000 0.25500700    |
| C -4.80770900 -1.52485200 0.75707000   | C -4.85340900 -1.47400900 0.72212600   |
| H -6.31376400 -0.05094000 1.22254400   | H -6.35116400 0.03105600 1.10926700    |
| H -3.04415900 -2.68211100 0.20845500   | H -3.10115200 -2.66883900 0.24674000   |
| H -5.44167600 -2.38827200 0.92514700   | H -5.50335700 -2.32508200 0.89214700   |
| H -4.80213000 1.86860400 0.79599000    | H -4.80090700 1.91738800 0.68029600    |

|                                           |             |             |             |                                           |             |             |             |
|-------------------------------------------|-------------|-------------|-------------|-------------------------------------------|-------------|-------------|-------------|
| H                                         | -1.51282500 | 4.99050400  | -0.21976700 | H                                         | -1.47286400 | 4.98563800  | -0.28944200 |
| C                                         | -1.33755300 | 3.92039100  | -0.26933600 | C                                         | -1.30189900 | 3.91399000  | -0.31586500 |
| C                                         | -0.09788400 | 3.42279100  | -0.66767200 | C                                         | -0.05454200 | 3.40339500  | -0.67084400 |
| C                                         | -2.35901900 | 3.03072600  | 0.06383500  | C                                         | -2.33657300 | 3.03510400  | 0.00467700  |
| C                                         | 0.07918800  | 2.04292100  | -0.71349400 | C                                         | 0.11484800  | 2.02181000  | -0.68661500 |
| H                                         | 0.71799600  | 4.08344900  | -0.93894700 | H                                         | 0.77239300  | 4.05497200  | -0.93048700 |
| C                                         | -2.11636100 | 1.65944400  | -0.00867300 | C                                         | -2.09963200 | 1.66112200  | -0.03779000 |
| H                                         | -3.32710400 | 3.40680400  | 0.37283400  | H                                         | -3.30991600 | 3.42250000  | 0.28125700  |
| C                                         | -5.28648400 | -0.22647400 | 0.91886800  | C                                         | -5.31823200 | -0.16586600 | 0.83978200  |
| H                                         | 1.02058400  | 1.59426500  | -1.01313100 | H                                         | 1.06312300  | 1.56459400  | -0.95058100 |
| C                                         | -3.48235400 | -1.70283600 | 0.36736400  | C                                         | -3.52066400 | -1.67578500 | 0.37191500  |
| O                                         | 0.07749900  | -3.32115700 | -0.76946000 | O                                         | 0.16083700  | -3.23866300 | -1.17110700 |
| O                                         | -0.92159700 | -2.51174400 | -1.07147100 | O                                         | -0.95161500 | -2.59653200 | -0.96220100 |
| O                                         | 1.17654800  | -0.96091800 | -0.36362600 | O                                         | 1.14962000  | -1.07608200 | -0.15404400 |
| C                                         | 1.83520500  | -0.97382300 | 0.94740900  | C                                         | 1.84517500  | -0.97045300 | 1.12571200  |
| H                                         | 1.55805700  | -0.02098000 | 1.40743300  | H                                         | 1.56669700  | 0.01138000  | 1.52018100  |
| C                                         | 3.34394300  | -1.10905700 | 0.81230200  | C                                         | 3.35208300  | -1.09180500 | 0.95299000  |
| H                                         | 3.75513100  | -1.20125400 | 1.82591900  | H                                         | 3.79870900  | -1.09869600 | 1.95572900  |
| H                                         | 3.57649800  | -2.05665700 | 0.30610200  | H                                         | 3.58570100  | -2.07052600 | 0.51090900  |
| C                                         | 4.02197600  | 0.06693200  | 0.08404100  | C                                         | 3.98321500  | 0.03571500  | 0.11442200  |
| H                                         | 3.56663300  | 0.17393100  | -0.91181600 | H                                         | 3.49168200  | 0.05796100  | -0.86963300 |
| H                                         | 3.81667500  | 0.99742100  | 0.63181300  | H                                         | 3.77944200  | 1.00198600  | 0.59730200  |
| C                                         | 5.50936700  | -0.12194600 | -0.05422400 | C                                         | 5.46824300  | -0.13795400 | -0.06298400 |
| H                                         | 5.82944000  | -0.97316700 | -0.65822200 | H                                         | 5.78322500  | -1.02435400 | -0.61699300 |
| C                                         | 6.43419600  | 0.66027400  | 0.50875000  | C                                         | 6.39731400  | 0.69647700  | 0.41105200  |
| H                                         | 6.10502700  | 1.51004100  | 1.11109000  | H                                         | 6.07342000  | 1.58100800  | 0.96422700  |
| C                                         | 7.91858600  | 0.47828300  | 0.38306500  | C                                         | 7.87968700  | 0.52974700  | 0.24591200  |
| H                                         | 8.38808500  | 1.36225800  | -0.06806300 | H                                         | 8.31758200  | 1.38771800  | -0.28091500 |
| H                                         | 8.38458700  | 0.34501300  | 1.36816900  | H                                         | 8.38151100  | 0.47199300  | 1.22070600  |
| H                                         | 8.16905700  | -0.39145700 | -0.23282200 | H                                         | 8.12466600  | -0.37633700 | -0.31757200 |
| H                                         | 1.41079600  | -1.79338800 | 1.53834000  | H                                         | 1.45686700  | -1.74149200 | 1.80173700  |
| H                                         | 1.31628500  | -1.84383000 | -0.77987400 | H                                         | 1.23150600  | -2.00036600 | -0.51922600 |
| <b>TS1-2</b><br>Charge=1 Multiplicity = 1 |             |             |             | <b>TS1-2</b><br>Charge=1 Multiplicity = 3 |             |             |             |
| Cu                                        | -0.72747000 | -0.76013900 | -0.12739900 | Cu                                        | -0.44525100 | -0.14804100 | 0.38464600  |
| N                                         | -2.66570300 | -0.68421300 | 0.02608800  | N                                         | -2.00567400 | -1.19952300 | -0.22530000 |
| N                                         | -0.87249900 | 1.18305000  | -0.14661500 | N                                         | -1.69554000 | 1.36890500  | 0.17166500  |
| C                                         | -4.52361900 | 0.79807000  | 0.29868000  | C                                         | -4.29216700 | -1.04073900 | -0.91216400 |
| C                                         | -3.16036400 | 0.57906500  | 0.11646500  | C                                         | -3.10137700 | -0.44750000 | -0.49463700 |
| C                                         | -4.86243300 | -1.58645200 | 0.28328800  | C                                         | -3.21828500 | -3.18994000 | -0.75963200 |
| H                                         | -6.44784500 | -0.14265000 | 0.52677500  | H                                         | -5.26788500 | -2.90438200 | -1.37338700 |
| H                                         | -3.02049000 | -2.71402300 | 0.01422500  | H                                         | -1.16054300 | -3.07743700 | -0.08483500 |

|                           |             |             |             |                           |             |             |             |
|---------------------------|-------------|-------------|-------------|---------------------------|-------------|-------------|-------------|
| H                         | -5.49886900 | -2.46235600 | 0.34043800  | H                         | -3.22487100 | -4.27061300 | -0.84740700 |
| H                         | -4.91559000 | 1.80542900  | 0.37543200  | H                         | -5.16848300 | -0.43905500 | -1.12208100 |
| H                         | -1.53501000 | 4.97302800  | -0.21094800 | H                         | -4.33425200 | 4.08196700  | -0.55274300 |
| C                         | -1.34554700 | 3.90429400  | -0.19514900 | C                         | -3.58825500 | 3.32051200  | -0.34792400 |
| C                         | -0.05117000 | 3.41242100  | -0.35179400 | C                         | -2.32984100 | 3.67328000  | 0.13629600  |
| C                         | -2.40612600 | 3.01187500  | -0.02780700 | C                         | -3.88422100 | 1.97642700  | -0.57360100 |
| C                         | 0.14733600  | 2.03390800  | -0.32430100 | C                         | -1.40562500 | 2.66136500  | 0.37872400  |
| H                         | 0.79355100  | 4.07663000  | -0.49647000 | H                         | -2.06171000 | 4.70770100  | 0.31998000  |
| C                         | -2.14116900 | 1.64423700  | -0.01175200 | C                         | -2.91360500 | 1.01177800  | -0.30371600 |
| H                         | -3.41903100 | 3.38231700  | 0.07800700  | H                         | -4.85631500 | 1.69217900  | -0.95845100 |
| C                         | -5.38307400 | -0.29838800 | 0.38426200  | C                         | -4.34802600 | -2.42783500 | -1.04928400 |
| H                         | 1.12115900  | 1.57455000  | -0.45382400 | H                         | -0.40682500 | 2.87500800  | 0.74287600  |
| C                         | -3.49011500 | -1.74062300 | 0.10298200  | C                         | -2.06365500 | -2.53400000 | -0.34086400 |
| O                         | 0.16753900  | -3.07805500 | -1.04685300 | O                         | 0.78878700  | -2.48196100 | 1.51922900  |
| O                         | -0.72021700 | -2.63053400 | -0.11708800 | O                         | -0.04508100 | -1.45666700 | 1.84739300  |
| H                         | 0.95347600  | -2.46948400 | -0.85131200 | H                         | 1.65877400  | -2.05162900 | 1.35341200  |
| O                         | 1.10488300  | -0.84500600 | -0.28267600 | O                         | 1.20837000  | 0.47950300  | 0.13487600  |
| C                         | 1.78457400  | -0.84527100 | 0.96893100  | C                         | 2.16129600  | 0.87076500  | 1.08889400  |
| H                         | 1.61634100  | 0.11171000  | 1.49169500  | H                         | 2.30952700  | 1.96129900  | 1.02226200  |
| C                         | 3.29000400  | -1.04560700 | 0.75761700  | C                         | 3.51583900  | 0.18515000  | 0.81964100  |
| H                         | 3.75715000  | -1.13237800 | 1.74714800  | H                         | 4.20492600  | 0.48290300  | 1.62033600  |
| H                         | 3.45121000  | -2.00658200 | 0.25067200  | H                         | 3.39189700  | -0.90676000 | 0.91431200  |
| C                         | 3.96182500  | 0.08774400  | -0.03783600 | C                         | 4.12190000  | 0.51774600  | -0.55400600 |
| H                         | 3.45881200  | 0.17420800  | -1.01195500 | H                         | 3.39824000  | 0.23824700  | -1.33217300 |
| H                         | 3.81074400  | 1.04052800  | 0.49016200  | H                         | 4.26402300  | 1.60388300  | -0.62997700 |
| C                         | 5.43413500  | -0.14705600 | -0.24148700 | C                         | 5.43175900  | -0.18609500 | -0.77989800 |
| H                         | 5.70032400  | -1.02716600 | -0.83040700 | H                         | 5.39212700  | -1.27714900 | -0.81528200 |
| C                         | 6.40978300  | 0.62338800  | 0.24906500  | C                         | 6.61421500  | 0.42206200  | -0.92728600 |
| H                         | 6.13688100  | 1.50157900  | 0.83859700  | H                         | 6.64809600  | 1.51295900  | -0.89264300 |
| C                         | 7.87987100  | 0.39082400  | 0.05627100  | C                         | 7.92545700  | -0.27079700 | -1.15202500 |
| H                         | 8.35342900  | 1.24490000  | -0.44575200 | H                         | 8.37957300  | 0.04367000  | -2.10099300 |
| H                         | 8.39125700  | 0.27261200  | 1.02074900  | H                         | 8.64605200  | -0.01757900 | -0.36305800 |
| H                         | 8.07242000  | -0.50495700 | -0.54302600 | H                         | 7.81124400  | -1.35948600 | -1.17344900 |
| H                         | 1.40303400  | -1.65154600 | 1.61639200  | H                         | 1.82812100  | 0.63170900  | 2.11093700  |
| <b>2</b>                  |             |             |             | <b>2</b>                  |             |             |             |
| Charge=1 Multiplicity = 1 |             |             |             | Charge=1 Multiplicity = 3 |             |             |             |
| Cu                        | -0.63512200 | -0.71778400 | -0.20164400 | Cu                        | -0.57498700 | -0.69434700 | -0.01193400 |
| N                         | -2.50203700 | -0.62629800 | 0.35294800  | N                         | -2.57163800 | -0.78132500 | 0.10652700  |
| N                         | -0.84708700 | 1.21187600  | -0.32950500 | N                         | -0.97119700 | 1.27123900  | -0.12773900 |
| C                         | -4.36221800 | 0.82557100  | 0.73861800  | C                         | -4.58741800 | 0.50589900  | 0.07228800  |
| C                         | -3.03526500 | 0.62253900  | 0.36938800  | C                         | -3.19539400 | 0.41963600  | 0.03036700  |
| C                         | -4.57804700 | -1.55010400 | 1.07539700  | C                         | -4.68500900 | -1.89078700 | 0.26859400  |
| H                         | -6.17859400 | -0.13588000 | 1.38383900  | H                         | -6.42233900 | -0.60954100 | 0.22971700  |

|                           |             |             |             |                           |             |             |             |
|---------------------------|-------------|-------------|-------------|---------------------------|-------------|-------------|-------------|
| H                         | -2.73812000 | -2.64516400 | 0.65560900  | H                         | -2.73040000 | -2.83104300 | 0.25378400  |
| H                         | -5.15237200 | -2.42865700 | 1.34708500  | H                         | -5.23384800 | -2.82111700 | 0.36300600  |
| H                         | -4.78553300 | 1.82326900  | 0.75100200  | H                         | -5.08460400 | 1.46643900  | 0.00811700  |
| H                         | -1.54818900 | 4.98595800  | -0.53329100 | H                         | -2.06075400 | 4.96502900  | -0.26076900 |
| C                         | -1.34807700 | 3.92056800  | -0.47613100 | C                         | -1.75021300 | 3.92560400  | -0.22114900 |
| C                         | -0.08475900 | 3.42018600  | -0.78600100 | C                         | -0.39873200 | 3.58740000  | -0.25288000 |
| C                         | -2.36142200 | 3.04196200  | -0.08857700 | C                         | -2.70748600 | 2.91540200  | -0.12931500 |
| C                         | 0.13012900  | 2.04648600  | -0.69841000 | C                         | -0.05002800 | 2.24026900  | -0.19707500 |
| H                         | 0.72500400  | 4.07414800  | -1.08944800 | H                         | 0.37390700  | 4.34565200  | -0.31495100 |
| C                         | -2.08318300 | 1.67895000  | -0.02205800 | C                         | -2.28662500 | 1.58609500  | -0.08161400 |
| H                         | -3.34817900 | 3.41742500  | 0.15648800  | H                         | -3.76056400 | 3.16752800  | -0.08976700 |
| C                         | -5.14190700 | -0.27643900 | 1.09431900  | C                         | -5.33865800 | -0.66209300 | 0.19462500  |
| H                         | 1.08125600  | 1.57058900  | -0.91648400 | H                         | 0.98224800  | 1.90868500  | -0.19435100 |
| C                         | -3.24460100 | -1.68738500 | 0.69551500  | C                         | -3.29442100 | -1.90541400 | 0.21587000  |
| O                         | -1.11761000 | -2.82679700 | -1.47782300 | O                         | 0.73158200  | -2.78477200 | -1.26373700 |
| O                         | -0.62194700 | -2.51612900 | -0.18284700 | O                         | -0.52910300 | -2.31853600 | -0.91955500 |
| H                         | -0.31036700 | -3.12972900 | -1.93971100 | H                         | 0.53050200  | -3.66939700 | -1.63118700 |
| O                         | 1.09848500  | -0.58422800 | -0.56919200 | O                         | 0.99901500  | -0.44183300 | 0.85990100  |
| C                         | 2.01465800  | -1.65717000 | -0.52115500 | C                         | 1.97919700  | -1.38082800 | 1.19281000  |
| H                         | 1.94337800  | -2.20358900 | 0.42857700  | H                         | 2.22038400  | -1.24171000 | 2.25854200  |
| C                         | 3.43418400  | -1.07873100 | -0.67478700 | C                         | 3.27366300  | -1.18062000 | 0.36670800  |
| H                         | 4.11806000  | -1.93186400 | -0.77638200 | H                         | 3.96411900  | -1.98669300 | 0.64756500  |
| H                         | 3.48677500  | -0.51813200 | -1.61691100 | H                         | 3.03427300  | -1.32076500 | -0.69441900 |
| C                         | 3.88008800  | -0.19431500 | 0.50241900  | C                         | 3.94270700  | 0.18511700  | 0.59460200  |
| H                         | 3.16048200  | 0.62974300  | 0.61686500  | H                         | 3.22499800  | 0.97547400  | 0.32923900  |
| H                         | 3.83860000  | -0.77695300 | 1.43246300  | H                         | 4.17055800  | 0.31182400  | 1.66084100  |
| C                         | 5.26758200  | 0.35417800  | 0.30645000  | C                         | 5.19601700  | 0.32684600  | -0.22030600 |
| H                         | 5.40797300  | 1.00569100  | -0.55911000 | H                         | 5.07119300  | 0.30527500  | -1.30497700 |
| C                         | 6.31641200  | 0.08800900  | 1.09109600  | C                         | 6.43233900  | 0.44935400  | 0.28493100  |
| H                         | 6.17162100  | -0.56689700 | 1.95287900  | H                         | 6.55288900  | 0.46448100  | 1.36988100  |
| C                         | 7.70519900  | 0.62212500  | 0.89587800  | C                         | 7.68898700  | 0.57915500  | -0.52099800 |
| H                         | 8.03245800  | 1.20259400  | 1.76863900  | H                         | 8.21019200  | 1.51793500  | -0.29042200 |
| H                         | 8.42900800  | -0.19478300 | 0.77570700  | H                         | 8.39222200  | -0.23081200 | -0.28490600 |
| H                         | 7.77107800  | 1.26735500  | 0.01363800  | H                         | 7.48763600  | 0.55479000  | -1.59675600 |
| H                         | 1.83400000  | -2.36978500 | -1.34075900 | H                         | 1.62634800  | -2.41047300 | 1.03874700  |
| <b>3</b>                  |             |             |             | <b>3</b>                  |             |             |             |
| Charge=1 Multiplicity = 2 |             |             |             | Charge=1 Multiplicity = 4 |             |             |             |
| C                         | 0.92013600  | 1.08209600  | 2.51437600  | C                         | -0.51776200 | -2.67641600 | 1.32589900  |
| C                         | 0.83110200  | 1.92930100  | 3.61744800  | C                         | -0.41671100 | -3.73457500 | 2.22693800  |
| C                         | 0.32241300  | 3.21337900  | 3.43373400  | C                         | 0.83322200  | -4.31368700 | 2.43664800  |
| C                         | -0.07265500 | 3.61740100  | 2.15854400  | C                         | 1.93882700  | -3.82585100 | 1.74015800  |
| C                         | 0.04690100  | 2.71982200  | 1.09833700  | C                         | 1.76392600  | -2.76203300 | 0.85414000  |
| N                         | 0.53434300  | 1.47395900  | 1.29810100  | N                         | 0.54695000  | -2.20130500 | 0.66819000  |

|    |             |             |             |    |             |             |             |
|----|-------------|-------------|-------------|----|-------------|-------------|-------------|
| H  | 0.23757300  | 3.89918400  | 4.27098300  | H  | 0.94986900  | -5.14230000 | 3.12833600  |
| H  | 1.30793700  | 0.06914900  | 2.56370900  | H  | -1.45863900 | -2.18992300 | 1.09368300  |
| H  | 1.15499100  | 1.58213700  | 4.59227500  | H  | -1.30068400 | -4.09373400 | 2.74242500  |
| H  | -0.46046100 | 4.61631400  | 1.99594900  | H  | 2.91356000  | -4.27801900 | 1.88148700  |
| H  | -1.45141900 | 5.29388700  | -2.52612900 | H  | 6.15841000  | -2.18998200 | -0.69501500 |
| C  | -1.05510300 | 4.35916100  | -2.14179600 | C  | 5.11052400  | -1.90887100 | -0.73343600 |
| C  | -0.78909600 | 3.29450400  | -2.99979900 | C  | 4.67274600  | -0.92061600 | -1.61366100 |
| C  | -0.80479600 | 4.21533900  | -0.77738700 | C  | 4.18861400  | -2.53826200 | 0.10125700  |
| C  | -0.28766500 | 2.11126800  | -2.46064000 | C  | 3.31929900  | -0.59483700 | -1.62494500 |
| H  | -0.96706300 | 3.36735600  | -4.06688200 | H  | 5.35981600  | -0.41091500 | -2.28000200 |
| C  | -0.29332000 | 3.00733900  | -0.30610900 | C  | 2.84548900  | -2.16372300 | 0.03436800  |
| H  | -1.00265000 | 5.03377900  | -0.09500400 | H  | 4.51587200  | -3.30598900 | 0.79251500  |
| N  | -0.04510700 | 1.98020200  | -1.15327100 | N  | 2.43413100  | -1.20157100 | -0.82403800 |
| H  | -0.06547300 | 1.23604500  | -3.06273900 | H  | 2.91764200  | 0.16519300  | -2.28576100 |
| Cu | 0.58612100  | 0.30367800  | -0.30118800 | Cu | 0.49562900  | -0.74994300 | -0.74987400 |
| H  | -4.16101700 | -3.05765300 | 2.37666800  | H  | 0.77665400  | 3.35330400  | 3.63838900  |
| C  | -4.14989000 | -2.40145700 | 1.49924000  | C  | 0.94427200  | 3.48811800  | 2.56402500  |
| C  | -4.61472000 | -3.17802200 | 0.25087100  | C  | 0.14211300  | 4.70025900  | 2.04963800  |
| C  | -2.74241300 | -1.77937800 | 1.40162700  | C  | 0.62961000  | 2.14384800  | 1.87458200  |
| H  | -4.85886400 | -1.59641800 | 1.72195400  | H  | 2.01756700  | 3.67709600  | 2.45118100  |
| H  | -5.70833500 | -3.14078500 | 0.20806800  | H  | 0.74632400  | 5.60121700  | 2.19815500  |
| C  | -4.00720200 | -2.63741100 | -1.06097100 | C  | -0.27157500 | 4.56863800  | 0.56911100  |
| H  | -4.35565900 | -4.23786400 | 0.34498300  | H  | -0.76024700 | 4.84245900  | 2.65327700  |
| N  | -2.64940600 | -0.97537300 | 0.13627300  | N  | 0.72376700  | 2.33081900  | 0.38639600  |
| C  | -3.58759700 | -1.15379000 | -1.02238800 | C  | 0.64208600  | 3.67110400  | -0.28883800 |
| H  | -4.71316400 | -2.76801300 | -1.88865100 | H  | -0.31103500 | 5.55612000  | 0.09664200  |
| H  | -3.11794100 | -3.22104600 | -1.32710600 | H  | -1.28776800 | 4.16254000  | 0.50191000  |
| O  | -1.75583300 | -0.04856700 | 0.06769600  | O  | 1.00979600  | 1.31110700  | -0.35262800 |
| C  | -2.84659200 | -0.80438100 | -2.32048800 | C  | 0.01391700  | 3.48548900  | -1.67777400 |
| H  | -2.57996700 | 0.25401800  | -2.35167000 | H  | 0.63270200  | 2.85807800  | -2.32076400 |
| H  | -1.93588700 | -1.39811700 | -2.43326200 | H  | -0.97733600 | 3.02914200  | -1.60465300 |
| H  | -3.50607300 | -1.01662200 | -3.16842500 | H  | -0.09555900 | 4.46807200  | -2.14769200 |
| C  | -4.79009600 | -0.19907700 | -0.85453700 | C  | 2.06672000  | 4.24430600  | -0.44660000 |
| H  | -5.42356100 | -0.24526800 | -1.74716200 | H  | 2.02357100  | 5.17504900  | -1.02201600 |
| H  | -5.41185300 | -0.44714200 | 0.00903700  | H  | 2.54321300  | 4.46504400  | 0.51183800  |
| H  | -4.43668400 | 0.83083200  | -0.73929500 | H  | 2.69744000  | 3.53494600  | -0.99164700 |
| C  | -1.63664700 | -2.85415200 | 1.38238600  | C  | -0.78650000 | 1.63741700  | 2.21779300  |
| H  | -0.65604400 | -2.38037000 | 1.28211700  | H  | -1.01717500 | 0.72870100  | 1.65285600  |
| H  | -1.65372200 | -3.41783700 | 2.32180500  | H  | -0.84498400 | 1.40271500  | 3.28618300  |
| H  | -1.76730100 | -3.56408400 | 0.56032900  | H  | -1.55470500 | 2.38303000  | 1.99410900  |
| C  | -2.52797900 | -0.83778000 | 2.59755100  | C  | 1.67860100  | 1.10905300  | 2.31406800  |
| H  | -1.52185100 | -0.41564800 | 2.59537800  | H  | 1.45091900  | 0.11131600  | 1.93566700  |
| H  | -3.25008700 | -0.01493400 | 2.58393500  | H  | 2.67833900  | 1.39218700  | 1.97036500  |
| H  | -2.66657400 | -1.40044700 | 3.52658300  | H  | 1.69226300  | 1.06273900  | 3.40778600  |

|   |            |             |             |   |             |             |             |
|---|------------|-------------|-------------|---|-------------|-------------|-------------|
| O | 0.85259600 | -0.36824900 | -1.96698200 | O | 0.30333100  | -0.80515100 | -2.79336000 |
| O | 0.54396800 | -1.70757900 | -2.21778400 | O | -0.02577200 | 0.35800100  | -3.42986400 |
| H | 1.42616800 | -2.10082000 | -2.37059900 | H | -0.47606900 | 0.04555700  | -4.24327800 |
| H | 5.73793000 | -0.41808500 | -1.17965900 | H | -5.84912400 | -2.03678900 | -1.04355300 |
| C | 5.78032200 | -1.08112100 | -0.31216500 | C | -5.70084600 | -1.22674900 | -0.32589800 |
| C | 4.48306900 | -1.29426400 | 0.41934700  | C | -4.28002200 | -0.77354200 | -0.12963100 |
| C | 6.94764000 | -1.64308800 | 0.01371400  | C | -6.76658000 | -0.70823400 | 0.29105400  |
| C | 3.39902400 | -1.94996200 | -0.45776800 | C | -3.63921900 | -0.23099100 | -1.42005600 |
| H | 4.09229400 | -0.33191500 | 0.78130500  | H | -3.66723000 | -1.61568400 | 0.22506100  |
| H | 4.65514000 | -1.91772700 | 1.30718300  | H | -4.24236700 | -0.00119400 | 0.65170400  |
| H | 6.98475200 | -2.30638300 | 0.88050700  | H | -6.61369300 | 0.10352800  | 1.00583300  |
| C | 8.24412100 | -1.43844000 | -0.71507400 | C | -8.18762200 | -1.14965300 | 0.09041000  |
| C | 2.05342800 | -2.10739200 | 0.25498000  | C | -2.19041200 | 0.23223200  | -1.24221300 |
| H | 3.74320200 | -2.94184600 | -0.78111600 | H | -4.22974700 | 0.61746300  | -1.79138800 |
| H | 3.26138100 | -1.34457700 | -1.36612300 | H | -3.66690700 | -1.00371800 | -2.19961700 |
| H | 9.00912200 | -1.01336400 | -0.05181200 | H | -8.63254200 | -1.49853100 | 1.03194600  |
| H | 8.64603300 | -2.39123900 | -1.08445900 | H | -8.81483300 | -0.32010600 | -0.26250100 |
| H | 8.12499600 | -0.76535400 | -1.57070900 | H | -8.25857600 | -1.96261500 | -0.63981200 |
| O | 1.47808600 | -0.90546600 | 0.68644000  | O | -1.35391400 | -0.82382900 | -0.87932900 |
| H | 2.18698300 | -2.70109300 | 1.17613100  | H | -2.14779700 | 1.03812700  | -0.48553700 |
| H | 1.34198000 | -2.68670200 | -0.35452700 | H | -1.83816200 | 0.69305400  | -2.18637200 |

**TS3-4**

Charge=1 Multiplicity = 2

|   |             |             |             |
|---|-------------|-------------|-------------|
| C | 0.31905200  | -3.56845400 | -0.56141300 |
| C | 0.04414100  | -4.87864600 | -0.94651800 |
| C | -1.28703800 | -5.26709500 | -1.08446200 |
| C | -2.30079700 | -4.34257000 | -0.83267000 |
| C | -1.95429500 | -3.04588300 | -0.45224100 |
| N | -0.65735000 | -2.67981900 | -0.33192900 |
| H | -1.53889700 | -6.28019600 | -1.38235800 |
| H | 1.32809400  | -3.19714700 | -0.42052300 |
| H | 0.85806500  | -5.57162800 | -1.12876700 |
| H | -3.33962900 | -4.63482800 | -0.93112700 |
| H | -6.20380300 | -1.11894900 | 0.03215000  |
| C | -5.12364500 | -1.01928400 | 0.07612900  |
| C | -4.53524300 | 0.19572100  | 0.41891700  |
| C | -4.30954100 | -2.11174600 | -0.22081900 |
| C | -3.14502300 | 0.27570400  | 0.46203400  |
| H | -5.13439700 | 1.07066600  | 0.64583300  |
| C | -2.92399300 | -1.96464500 | -0.15455800 |
| H | -4.75309500 | -3.06014200 | -0.50002400 |
| N | -2.36316300 | -0.77956300 | 0.19240400  |

**TS3-4**

Charge=1 Multiplicity = 4

|   |             |             |             |
|---|-------------|-------------|-------------|
| C | 0.31905200  | -3.56845400 | -0.56141300 |
| C | 0.04414100  | -4.87864600 | -0.94651800 |
| C | -1.28703800 | -5.26709500 | -1.08446200 |
| C | -2.30079700 | -4.34257000 | -0.83267000 |
| C | -1.95429500 | -3.04588300 | -0.45224100 |
| N | -0.65735000 | -2.67981900 | -0.33192900 |
| H | -1.53889700 | -6.28019600 | -1.38235800 |
| H | 1.32809400  | -3.19714700 | -0.42052300 |
| H | 0.85806500  | -5.57162800 | -1.12876700 |
| H | -3.33962900 | -4.63482800 | -0.93112700 |
| H | -6.20380300 | -1.11894900 | 0.03215000  |
| C | -5.12364500 | -1.01928400 | 0.07612900  |
| C | -4.53524300 | 0.19572100  | 0.41891700  |
| C | -4.30954100 | -2.11174600 | -0.22081900 |
| C | -3.14502300 | 0.27570400  | 0.46203400  |
| H | -5.13439700 | 1.07066600  | 0.64583300  |
| C | -2.92399300 | -1.96464500 | -0.15455800 |
| H | -4.75309500 | -3.06014200 | -0.50002400 |
| N | -2.36316300 | -0.77956300 | 0.19240400  |

|    |             |             |             |    |             |             |             |
|----|-------------|-------------|-------------|----|-------------|-------------|-------------|
| H  | -2.62359700 | 1.20159300  | 0.67925100  | H  | -2.62359700 | 1.20159300  | 0.67925100  |
| Cu | -0.37410000 | -0.81233400 | 0.30802900  | Cu | -0.37410000 | -0.81233400 | 0.30802900  |
| H  | -1.19557700 | 4.40508500  | -2.75349300 | H  | -1.19557700 | 4.40508500  | -2.75349300 |
| C  | -1.59954800 | 3.76961300  | -1.95694700 | C  | -1.59954800 | 3.76961300  | -1.95694700 |
| C  | -1.93541500 | 4.62994300  | -0.72558000 | C  | -1.93541500 | 4.62994300  | -0.72558000 |
| C  | -0.56330600 | 2.63181900  | -1.68340900 | C  | -0.56330600 | 2.63181900  | -1.68340900 |
| H  | -2.52318100 | 3.33286200  | -2.35330500 | H  | -2.52318100 | 3.33286200  | -2.35330500 |
| H  | -2.75598200 | 4.17108100  | -0.16043800 | H  | -2.75598200 | 4.17108100  | -0.16043800 |
| C  | -0.71525500 | 4.78269300  | 0.18186500  | C  | -0.71525500 | 4.78269300  | 0.18186500  |
| H  | -2.29668900 | 5.61284200  | -1.04752200 | H  | -2.29668900 | 5.61284200  | -1.04752200 |
| N  | -0.61876900 | 2.34251800  | -0.21466600 | N  | -0.61876900 | 2.34251800  | -0.21466600 |
| C  | -0.26075800 | 3.42322500  | 0.77341900  | C  | -0.26075800 | 3.42322500  | 0.77341900  |
| H  | -0.92852100 | 5.46353800  | 1.01382000  | H  | -0.92852100 | 5.46353800  | 1.01382000  |
| H  | 0.10480000  | 5.24180100  | -0.38336800 | H  | 0.10480000  | 5.24180100  | -0.38336800 |
| O  | 0.04837000  | 1.15472400  | 0.12672400  | O  | 0.04837000  | 1.15472400  | 0.12672400  |
| C  | 1.23801300  | 3.47433200  | 1.13053200  | C  | 1.23801300  | 3.47433200  | 1.13053200  |
| H  | 1.55737100  | 2.57075300  | 1.65751100  | H  | 1.55737100  | 2.57075300  | 1.65751100  |
| H  | 1.87434100  | 3.60645700  | 0.25185200  | H  | 1.87434100  | 3.60645700  | 0.25185200  |
| H  | 1.41548000  | 4.32672600  | 1.79555500  | H  | 1.41548000  | 4.32672600  | 1.79555500  |
| C  | -1.05846200 | 3.12511100  | 2.05784500  | C  | -1.05846200 | 3.12511100  | 2.05784500  |
| H  | -0.77808600 | 3.82760700  | 2.85021400  | H  | -0.77808600 | 3.82760700  | 2.85021400  |
| H  | -2.13674600 | 3.22426900  | 1.88921700  | H  | -2.13674600 | 3.22426900  | 1.88921700  |
| H  | -0.85317700 | 2.11165900  | 2.41546900  | H  | -0.85317700 | 2.11165900  | 2.41546900  |
| C  | 0.83960400  | 3.02859900  | -2.20093400 | C  | 0.83960400  | 3.02859900  | -2.20093400 |
| H  | 1.59696000  | 2.28582400  | -1.92955300 | H  | 1.59696000  | 2.28582400  | -1.92955300 |
| H  | 0.81784100  | 3.08738000  | -3.29492600 | H  | 0.81784100  | 3.08738000  | -3.29492600 |
| H  | 1.16602700  | 4.00311200  | -1.83157400 | H  | 1.16602700  | 4.00311200  | -1.83157400 |
| C  | -1.00854400 | 1.37313200  | -2.44842400 | C  | -1.00854400 | 1.37313200  | -2.44842400 |
| H  | -0.26599200 | 0.57081200  | -2.39389400 | H  | -0.26599200 | 0.57081200  | -2.39389400 |
| H  | -1.96475300 | 0.99878700  | -2.07034500 | H  | -1.96475300 | 0.99878700  | -2.07034500 |
| H  | -1.14119800 | 1.62532200  | -3.50561200 | H  | -1.14119800 | 1.62532200  | -3.50561200 |
| H  | 1.22226100  | 1.00292000  | -0.10033700 | H  | 1.22226100  | 1.00292000  | -0.10033700 |
| O  | -0.33912200 | -1.17273500 | 2.64099400  | O  | -0.33912200 | -1.17273500 | 2.64099400  |
| O  | -1.17695300 | -0.47759400 | 3.40894800  | O  | -1.17695300 | -0.47759400 | 3.40894800  |
| H  | -0.79290900 | -0.53449400 | 4.31392900  | H  | -0.79290900 | -0.53449400 | 4.31392900  |
| H  | 8.48026800  | -0.34232100 | 1.06486300  | H  | 8.48026800  | -0.34232100 | 1.06486300  |
| C  | 8.41077600  | -0.55217600 | -0.00762600 | C  | 8.41077600  | -0.55217600 | -0.00762600 |
| C  | 6.99361500  | -0.80820300 | -0.43170500 | C  | 6.99361500  | -0.80820300 | -0.43170500 |
| H  | 9.05287100  | -1.41547600 | -0.22750800 | H  | 9.05287100  | -1.41547600 | -0.22750800 |
| H  | 8.83881000  | 0.30132100  | -0.55025100 | H  | 8.83881000  | 0.30132100  | -0.55025100 |
| C  | 5.92971300  | -0.79677000 | 0.37682300  | C  | 5.92971300  | -0.79677000 | 0.37682300  |
| H  | 6.84264300  | -1.02483200 | -1.49155100 | H  | 6.84264300  | -1.02483200 | -1.49155100 |
| C  | 4.51300700  | -1.04808300 | -0.05751500 | C  | 4.51300700  | -1.04808300 | -0.05751500 |
| H  | 6.07355200  | -0.57857700 | 1.43729500  | H  | 6.07355200  | -0.57857700 | 1.43729500  |



|   |            |             |             |   |            |             |             |
|---|------------|-------------|-------------|---|------------|-------------|-------------|
| C | 3.59684600 | 0.18689300  | 0.15752900  | C | 3.59684600 | 0.18689300  | 0.15752900  |
| H | 4.08163800 | -1.88332300 | 0.51211000  | H | 4.08163800 | -1.88332300 | 0.51211000  |
| H | 4.49345400 | -1.33587400 | -1.11727700 | H | 4.49345400 | -1.33587400 | -1.11727700 |
| C | 2.16855000 | -0.06555700 | -0.25188600 | C | 2.16855000 | -0.06555700 | -0.25188600 |
| H | 3.99279100 | 1.03292500  | -0.41834300 | H | 3.99279100 | 1.03292500  | -0.41834300 |
| H | 3.62000600 | 0.47179700  | 1.21714200  | H | 3.62000600 | 0.47179700  | 1.21714200  |
| O | 1.48216900 | -0.95310100 | 0.49796900  | O | 1.48216900 | -0.95310100 | 0.49796900  |
| H | 2.02238900 | -0.17000600 | -1.34500000 | H | 2.02238900 | -0.17000600 | -1.34500000 |

|          |                           |             |             |          |                           |             |             |
|----------|---------------------------|-------------|-------------|----------|---------------------------|-------------|-------------|
| <b>4</b> | Charge=1 Multiplicity = 2 |             |             | <b>4</b> | Charge=1 Multiplicity = 4 |             |             |
| C        | -1.85732600               | 2.90059400  | -0.08316200 | C        | -1.85146700               | 2.94497500  | -0.28831400 |
| C        | -2.32607500               | 4.19609000  | -0.29194800 | C        | -2.22239200               | 4.24967400  | -0.60715300 |
| C        | -1.39721100               | 5.21791300  | -0.47809700 | C        | -1.22042000               | 5.18357900  | -0.86354700 |
| C        | -0.03416100               | 4.92138100  | -0.44637200 | C        | 0.11669900                | 4.79151300  | -0.79398200 |
| C        | 0.36301200                | 3.60073700  | -0.23595900 | C        | 0.41711700                | 3.46769500  | -0.47212400 |
| N        | -0.54969900               | 2.61908700  | -0.06975600 | N        | -0.56657000               | 2.57056300  | -0.23271100 |
| H        | -1.72549200               | 6.23993900  | -0.64034500 | H        | -1.47214900               | 6.20940600  | -1.11440800 |
| H        | -2.51022100               | 2.05271100  | 0.09404900  | H        | -2.57186200               | 2.16548500  | -0.06594700 |
| H        | -3.39249500               | 4.39274000  | -0.30118700 | H        | -3.27195200               | 4.51926400  | -0.64913900 |
| H        | 0.69662700                | 5.71088100  | -0.57643300 | H        | 0.90449800                | 5.51018600  | -0.98686700 |
| H        | 5.02670200                | 4.08323300  | -0.34165300 | H        | 5.10135700                | 3.57332200  | -0.68341100 |
| C        | 4.15864800                | 3.44324700  | -0.21703800 | C        | 4.18818700                | 3.01473000  | -0.50249300 |
| C        | 4.30883700                | 2.08460900  | 0.05042600  | C        | 4.23528400                | 1.66243600  | -0.17209300 |
| C        | 2.87585400                | 3.97776300  | -0.32733800 | C        | 2.95035100                | 3.64702800  | -0.61064800 |
| C        | 3.16490700                | 1.30364500  | 0.19730600  | C        | 3.03739700                | 0.98699700  | 0.05177200  |
| H        | 5.28940400                | 1.63033800  | 0.14089700  | H        | 5.17789500                | 1.13238000  | -0.09080300 |
| C        | 1.77181500                | 3.14149000  | -0.16089100 | C        | 1.78844300                | 2.91307300  | -0.37153000 |
| H        | 2.74314400                | 5.03162100  | -0.54136100 | H        | 2.89738900                | 4.69474500  | -0.88198600 |
| N        | 1.92954000                | 1.81898900  | 0.10061500  | N        | 1.84758600                | 1.60032800  | -0.03515800 |
| H        | 3.20717100                | 0.23284400  | 0.37568500  | H        | 3.00394900                | -0.07622900 | 0.27280000  |
| Cu       | 0.21727600                | 0.80708000  | 0.28992300  | Cu       | 0.07247900                | 0.75317700  | 0.30184200  |
| H        | 4.13531400                | -3.92782400 | -1.20616900 | H        | 3.16636700                | -4.38674600 | -2.05039200 |
| C        | 3.93889300                | -2.97518900 | -0.70149000 | C        | 3.27382800                | -3.47235600 | -1.45568600 |
| C        | 4.07207100                | -3.15713900 | 0.82254500  | C        | 3.71741700                | -3.83256400 | -0.02705600 |
| C        | 2.53578200                | -2.47228000 | -1.17543800 | C        | 1.91923700                | -2.69544700 | -1.53434000 |
| H        | 4.71036600                | -2.27936700 | -1.04996000 | H        | 4.05952500                | -2.88227800 | -1.94014800 |
| H        | 4.40875300                | -2.22186300 | 1.28683900  | H        | 4.28704800                | -3.00397600 | 0.41098500  |
| C        | 2.74170600                | -3.58355100 | 1.44196000  | C        | 2.50638500                | -4.14161600 | 0.85148800  |
| H        | 4.84585500                | -3.90104300 | 1.04136100  | H        | 4.39642400                | -4.69170100 | -0.05516200 |
| N        | 1.95005000                | -1.74700400 | 0.00152900  | N        | 1.72467300                | -2.04365000 | -0.19567600 |
| C        | 1.64296600                | -2.50071800 | 1.26961100  | C        | 1.59402200                | -2.90120200 | 1.04187100  |

|                           |             |             |             |                          |             |             |             |
|---------------------------|-------------|-------------|-------------|--------------------------|-------------|-------------|-------------|
| H                         | 2.85530800  | -3.78415000 | 2.51339600  | H                        | 2.81803300  | -4.48899200 | 1.84307900  |
| H                         | 2.41267900  | -4.52573000 | 0.98873700  | H                        | 1.93397300  | -4.96373900 | 0.40584400  |
| O                         | 0.79340600  | -0.97699700 | -0.41408800 | O                        | 0.60868300  | -1.13368300 | -0.27925400 |
| C                         | 0.24534400  | -3.15133800 | 1.31495500  | C                        | 0.15446100  | -3.35145500 | 1.36444100  |
| H                         | -0.54861800 | -2.39828300 | 1.33812300  | H                        | -0.48337000 | -2.51167900 | 1.65721400  |
| H                         | 0.06688700  | -3.82371200 | 0.47215100  | H                        | -0.32025000 | -3.87838800 | 0.53232000  |
| H                         | 0.16478200  | -3.74595500 | 2.23151900  | H                        | 0.18692700  | -4.04588300 | 2.21079500  |
| C                         | 1.74498400  | -1.48293600 | 2.42289000  | C                        | 2.11777200  | -2.05534800 | 2.21757200  |
| H                         | 1.48776000  | -1.95973300 | 3.37509600  | H                        | 1.99731200  | -2.60005000 | 3.16024600  |
| H                         | 2.75777600  | -1.07746800 | 2.51201300  | H                        | 3.18050700  | -1.82031100 | 2.09550100  |
| H                         | 1.05159000  | -0.64781900 | 2.27672700  | H                        | 1.56156700  | -1.11655700 | 2.30531300  |
| C                         | 1.68437900  | -3.64291800 | -1.71909200 | C                        | 0.76466500  | -3.63241400 | -1.96075900 |
| H                         | 0.67601200  | -3.32167100 | -1.99513200 | H                        | -0.20704200 | -3.12487000 | -1.93192700 |
| H                         | 2.15996800  | -4.03496900 | -2.62501100 | H                        | 0.92488300  | -3.95494100 | -2.99525700 |
| H                         | 1.60657400  | -4.47417900 | -1.01404600 | H                        | 0.70122700  | -4.53388500 | -1.34664200 |
| C                         | 2.73093800  | -1.46003700 | -2.31802300 | C                        | 2.05044600  | -1.58372900 | -2.59050100 |
| H                         | 1.78034600  | -1.15054600 | -2.75962400 | H                        | 1.10302500  | -1.06700600 | -2.76537100 |
| H                         | 3.26120800  | -0.56775200 | -1.97037300 | H                        | 2.80127800  | -0.84665600 | -2.28762500 |
| H                         | 3.33375200  | -1.92404600 | -3.10564000 | H                        | 2.37363300  | -2.02558200 | -3.53890400 |
| H                         | 0.01946300  | -1.55685700 | -0.63149800 | O                        | 0.14931700  | 0.93818700  | 2.62593300  |
| O                         | -1.37778600 | 0.11862800  | 0.95448700  | O                        | 0.86245200  | 1.93744800  | 3.14015100  |
| O                         | -1.19056200 | 0.79515900  | 2.24252800  | H                        | 0.56623500  | 1.99949600  | 4.07747500  |
| H                         | -1.10531800 | 0.03415100  | 2.84428600  | H                        | -0.26949600 | -1.60704400 | -0.34176900 |
| H                         | -7.64245100 | -0.16564600 | 1.69803200  | H                        | -9.12154300 | -1.21381900 | -0.31380800 |
| C                         | -8.06429400 | -0.81883900 | 0.92697500  | C                        | -8.27548200 | -1.91173000 | -0.25677600 |
| C                         | -7.03842200 | -1.20143100 | -0.09955100 | C                        | -6.97896600 | -1.22082800 | -0.56703000 |
| H                         | -8.91156100 | -0.29685100 | 0.46321300  | H                        | -8.48182400 | -2.71204800 | -0.98001400 |
| H                         | -8.47797100 | -1.70747300 | 1.42155800  | H                        | -8.26786500 | -2.35360100 | 0.74516500  |
| C                         | -5.76351900 | -0.80299000 | -0.10342400 | C                        | -5.93146700 | -1.13403900 | 0.25809100  |
| H                         | -7.38489800 | -1.85611900 | -0.90189700 | H                        | -6.90891700 | -0.75428300 | -1.55225200 |
| C                         | -4.74485000 | -1.19949400 | -1.13837400 | C                        | -4.63051500 | -0.45292900 | -0.06282400 |
| H                         | -5.40524600 | -0.15058300 | 0.69539700  | H                        | -5.99516300 | -1.60150700 | 1.24329200  |
| C                         | -3.55392200 | -1.97241600 | -0.51142700 | C                        | -3.42441500 | -1.43481700 | -0.08037800 |
| H                         | -4.34978000 | -0.30479600 | -1.64209200 | H                        | -4.41566100 | 0.32230500  | 0.68760200  |
| H                         | -5.22167200 | -1.81295000 | -1.91357800 | H                        | -4.70283600 | 0.04918400  | -1.03725500 |
| C                         | -2.58935200 | -2.44345600 | -1.55642400 | C                        | -2.11033600 | -0.76810200 | -0.36682400 |
| H                         | -3.95308100 | -2.86856100 | -0.01180000 | H                        | -3.60745400 | -2.20832000 | -0.83684400 |
| H                         | -3.02472600 | -1.36307800 | 0.22779600  | H                        | -3.36891800 | -1.93989200 | 0.89340000  |
| O                         | -1.38663300 | -2.22454100 | -1.57225000 | O                        | -1.62112200 | 0.04870500  | 0.58816700  |
| H                         | -3.02760700 | -3.03665600 | -2.38470100 | H                        | -1.93058700 | -0.46261300 | -1.41074200 |
| <b>9</b>                  |             |             |             | <b>10</b>                |             |             |             |
| Charge=1 Multiplicity = 2 |             |             |             | Charge=1 Multiplicity =2 |             |             |             |

|    |             |             |             |    |             |             |             |
|----|-------------|-------------|-------------|----|-------------|-------------|-------------|
| C  | 1.59940400  | 2.65965500  | -0.09326900 | C  | 1.85371800  | 1.77588500  | -2.26446600 |
| C  | 2.63035500  | 3.59347600  | -0.14282400 | C  | 2.56739700  | 2.83038400  | -2.82433800 |
| C  | 3.94348600  | 3.12874200  | -0.12680900 | C  | 2.47251200  | 4.08649200  | -2.22604700 |
| C  | 4.17689700  | 1.75611300  | -0.06474200 | C  | 1.66441900  | 4.23982600  | -1.10260000 |
| C  | 3.09209000  | 0.87810800  | -0.02026100 | C  | 0.96650600  | 3.13676600  | -0.60245600 |
| N  | 1.81539100  | 1.33655700  | -0.03474200 | N  | 1.06971800  | 1.91356300  | -1.18220800 |
| H  | 4.77796000  | 3.82219800  | -0.16028700 | H  | 3.02028800  | 4.93452700  | -2.62498100 |
| H  | 0.55995700  | 2.97148100  | -0.10204600 | H  | 1.90108600  | 0.77841400  | -2.69066100 |
| H  | 2.40283500  | 4.65279400  | -0.19012300 | H  | 3.18067500  | 2.66598900  | -3.70379000 |
| H  | 5.19416200  | 1.38401000  | -0.04535400 | H  | 1.59179900  | 5.20598300  | -0.61707600 |
| H  | 5.43825200  | -3.18409400 | 0.04869500  | H  | -1.53649500 | 5.28109100  | 2.73154300  |
| C  | 4.49010700  | -2.65654100 | 0.08117300  | C  | -1.20677100 | 4.35932600  | 2.26252300  |
| C  | 3.29043300  | -3.35490300 | 0.19851800  | C  | -1.63938300 | 3.12215100  | 2.73830000  |
| C  | 4.46102100  | -1.26527400 | 0.00436000  | C  | -0.34640800 | 4.39875500  | 1.16806400  |
| C  | 2.10408300  | -2.62795900 | 0.23230300  | C  | -1.19077700 | 1.97238000  | 2.09654500  |
| H  | 3.26670500  | -4.43716900 | 0.26367000  | H  | -2.30945900 | 3.04391600  | 3.58765000  |
| C  | 3.23297000  | -0.60234500 | 0.04820200  | C  | 0.06458200  | 3.20205600  | 0.57474700  |
| H  | 5.38772200  | -0.71254800 | -0.09241900 | H  | -0.01717700 | 5.35300300  | 0.77377600  |
| N  | 2.06749200  | -1.28826000 | 0.15815100  | N  | -0.35490700 | 1.99946200  | 1.04466000  |
| H  | 1.14377300  | -3.12541000 | 0.32167700  | H  | -1.49571500 | 0.98687200  | 2.43401400  |
| Cu | 0.48711800  | -0.11233900 | 0.22688200  | Cu | 0.15946800  | 0.48051900  | -0.12487500 |
| H  | -5.88217000 | -0.15886500 | -1.06460900 | O  | -1.61832300 | -0.49466400 | -0.71999500 |
| C  | -4.91311800 | 0.34505900  | -1.13853300 | H  | 4.36713100  | -4.46196000 | 1.41040800  |
| C  | -3.87442100 | -0.67985300 | -1.63690700 | C  | 4.31613500  | -3.42967200 | 1.04883900  |
| C  | -4.53698600 | 0.98776700  | 0.21448900  | C  | 3.45259100  | -2.61305100 | 2.03065100  |
| H  | -5.04639100 | 1.14107200  | -1.87868300 | C  | 3.78464800  | -3.39255800 | -0.40027300 |
| H  | -3.88838900 | -0.73245200 | -2.73104600 | H  | 5.34741200  | -3.06142300 | 1.05103500  |
| C  | -2.42207600 | -0.40786100 | -1.20223600 | H  | 4.06740000  | -2.24423500 | 2.85942300  |
| H  | -4.14505600 | -1.68188800 | -1.28723400 | C  | 2.72176000  | -1.40238600 | 1.41180100  |
| C  | -3.59931400 | 0.14197500  | 1.10425700  | H  | 2.69436500  | -3.26059400 | 2.48395700  |
| H  | -5.44048900 | 1.21055000  | 0.79246800  | C  | 2.27144600  | -3.13087000 | -0.53626900 |
| H  | -4.04280300 | 1.95149400  | 0.04236600  | H  | 4.00988500  | -4.33483500 | -0.91156100 |
| N  | -2.39853900 | -0.20772800 | 0.27740600  | H  | 4.30666300  | -2.61143900 | -0.96547300 |
| C  | -1.83178600 | 0.84417100  | -1.88209000 | N  | 1.95574900  | -1.87970600 | 0.21503500  |
| C  | -1.55881800 | -1.63386200 | -1.54703400 | C  | 3.71428000  | -0.30408700 | 0.97150000  |
| C  | -3.15311100 | 0.97991800  | 2.31165600  | C  | 1.73805900  | -0.83295800 | 2.44482000  |
| C  | -4.27159000 | -1.15335700 | 1.60854800  | C  | 1.93564600  | -2.90527200 | -2.02102500 |
| O  | -1.23424200 | -0.14017600 | 0.87201500  | C  | 1.42017100  | -4.29916700 | 0.00739500  |
| H  | -0.81869300 | 1.01565400  | -1.49868700 | O  | 0.81778500  | -1.30447900 | -0.08927600 |
| H  | -1.76321900 | 0.69325700  | -2.96387000 | H  | 3.18298800  | 0.52536900  | 0.49327200  |
| H  | -2.43173100 | 1.73855700  | -1.69339100 | H  | 4.24484700  | 0.09041000  | 1.84489200  |
| H  | -0.52199000 | -1.47513700 | -1.23186800 | H  | 4.45952000  | -0.68295900 | 0.26661500  |
| H  | -1.93422700 | -2.53440900 | -1.05116800 | H  | 1.15530500  | -0.01432500 | 2.01897200  |
| H  | -1.56098500 | -1.80057900 | -2.62806700 | H  | 1.04156100  | -1.60325800 | 2.79151900  |

|                           |             |             |             |                          |             |             |             |
|---------------------------|-------------|-------------|-------------|--------------------------|-------------|-------------|-------------|
| H                         | -2.51239800 | 0.40886300  | 2.98624200  | H                        | 2.29629300  | -0.45472000 | 3.30629500  |
| H                         | -2.61156800 | 1.87731100  | 1.99728300  | H                        | 0.86485500  | -2.75343700 | -2.17262800 |
| H                         | -4.04382200 | 1.29389600  | 2.86482500  | H                        | 2.47054800  | -2.03432100 | -2.41520200 |
| H                         | -5.10682200 | -0.89872200 | 2.26968400  | H                        | 2.24274300  | -3.78287300 | -2.59851500 |
| H                         | -4.66506800 | -1.77019200 | 0.79688900  | H                        | 1.56761800  | -5.18732200 | -0.61625200 |
| H                         | -3.55620300 | -1.75260400 | 2.18086000  | H                        | 1.68082300  | -4.56315400 | 1.03553000  |
|                           |             |             |             | H                        | 0.35800100  | -4.03588600 | -0.01957500 |
|                           |             |             |             | C                        | -2.62204100 | -0.22858700 | -1.72981200 |
|                           |             |             |             | H                        | -2.87248200 | 0.82809600  | -1.59936800 |
|                           |             |             |             | C                        | -3.85623700 | -1.10798300 | -1.56660600 |
|                           |             |             |             | H                        | -4.53133600 | -0.90159700 | -2.40731700 |
|                           |             |             |             | H                        | -3.56327500 | -2.16403200 | -1.66936400 |
|                           |             |             |             | C                        | -4.60491200 | -0.89638500 | -0.23731900 |
|                           |             |             |             | H                        | -3.89813400 | -1.05751300 | 0.58967300  |
|                           |             |             |             | H                        | -4.93281400 | 0.14993800  | -0.17054500 |
|                           |             |             |             | C                        | -5.79044100 | -1.81142900 | -0.08551100 |
|                           |             |             |             | H                        | -5.57076000 | -2.88135000 | -0.06830800 |
|                           |             |             |             | C                        | -7.06070000 | -1.41117600 | 0.01646400  |
|                           |             |             |             | H                        | -7.27501200 | -0.34033100 | -0.00187100 |
|                           |             |             |             | C                        | -8.24836100 | -2.31771800 | 0.16204000  |
|                           |             |             |             | H                        | -8.79405200 | -2.11011500 | 1.09205600  |
|                           |             |             |             | H                        | -8.96258400 | -2.16951700 | -0.65870600 |
|                           |             |             |             | H                        | -7.95370700 | -3.37231300 | 0.16970000  |
|                           |             |             |             | H                        | -2.17694200 | -0.35343600 | -2.72574600 |
|                           |             |             |             | H                        | -1.34305800 | -1.42613200 | -0.77205700 |
| <b>TS 10-11</b>           |             |             |             | <b>11</b>                |             |             |             |
| Charge=1 Multiplicity = 2 |             |             |             | Charge=1 Multiplicity =2 |             |             |             |
| C                         | 3.07337000  | 1.21288800  | -1.36851700 | C                        | 2.85034500  | 1.39657300  | -1.54773000 |
| C                         | 4.16249500  | 2.02715900  | -1.66567200 | C                        | 3.93011200  | 2.25143300  | -1.74906600 |
| C                         | 4.13510600  | 3.35404400  | -1.24280500 | C                        | 3.89691500  | 3.51313800  | -1.15873900 |
| C                         | 3.02255000  | 3.82363200  | -0.54582300 | C                        | 2.78952500  | 3.88003400  | -0.39502700 |
| C                         | 1.96176000  | 2.95583400  | -0.28696400 | C                        | 1.73977000  | 2.97528300  | -0.23745900 |
| N                         | 2.00126900  | 1.66083900  | -0.69718800 | N                        | 1.78513900  | 1.74435000  | -0.81022300 |
| H                         | 4.96619500  | 4.02001600  | -1.45285600 | H                        | 4.71959100  | 4.20856700  | -1.29256500 |
| H                         | 3.04580500  | 0.17109200  | -1.66315400 | H                        | 2.82381600  | 0.40297800  | -1.98030500 |
| H                         | 5.00619300  | 1.62243300  | -2.21353200 | H                        | 4.76999300  | 1.92973800  | -2.35474400 |
| H                         | 2.98530100  | 4.85509500  | -0.21616500 | H                        | 2.74651100  | 4.86176200  | 0.06159800  |
| H                         | -0.94225100 | 5.83744500  | 2.02075500  | H                        | -1.14242000 | 5.45723600  | 2.51977900  |
| C                         | -0.73907500 | 4.85946700  | 1.59560600  | C                        | -0.94258800 | 4.55813600  | 1.94525000  |
| C                         | -1.68625200 | 3.84038400  | 1.67783200  | C                        | -1.88429000 | 3.53216800  | 1.88488600  |
| C                         | 0.47867300  | 4.61638600  | 0.95915300  | C                        | 0.26661300  | 4.42283300  | 1.26219600  |

|    |             |             |             |    |             |             |             |
|----|-------------|-------------|-------------|----|-------------|-------------|-------------|
| C  | -1.37988400 | 2.60146100  | 1.11945700  | C  | -1.58360100 | 2.39678600  | 1.13648600  |
| H  | -2.64384400 | 3.99478000  | 2.16270900  | H  | -2.83356000 | 3.60320300  | 2.40418800  |
| C  | 0.71906700  | 3.35184200  | 0.42161900  | C  | 0.50289800  | 3.25852100  | 0.53122300  |
| H  | 1.22089200  | 5.40281000  | 0.89004800  | H  | 1.00749600  | 5.21229200  | 1.30736000  |
| N  | -0.20683700 | 2.36983300  | 0.51441300  | N  | -0.42134200 | 2.27145900  | 0.48226400  |
| H  | -2.06917200 | 1.76388600  | 1.14116800  | H  | -2.26689900 | 1.55949300  | 1.04324000  |
| Cu | 0.35254100  | 0.64365700  | -0.28295100 | Cu | 0.12414600  | 0.68850400  | -0.55803500 |
| O  | -1.40415000 | -0.16001700 | -0.44362600 | O  | -1.46834500 | -0.13514600 | -0.87527100 |
| H  | 0.80636500  | -5.07350000 | 1.12446300  | H  | 3.49222200  | -4.73985000 | 1.87639200  |
| C  | 1.79448200  | -4.71521600 | 1.43535200  | C  | 3.36207500  | -3.66000800 | 1.74947000  |
| C  | 1.65297600  | -3.50137200 | 2.36319200  | C  | 1.96645600  | -3.26697800 | 2.27738000  |
| C  | 2.62105400  | -4.33706200 | 0.20926900  | C  | 3.57358100  | -3.26710400 | 0.27266200  |
| H  | 2.26958300  | -5.53842400 | 1.98035100  | H  | 4.14545700  | -3.19128800 | 2.35518500  |
| H  | 2.57068400  | -3.38920800 | 2.95291900  | H  | 2.00978900  | -3.04776700 | 3.35005900  |
| C  | 1.38911300  | -2.14802600 | 1.61665800  | C  | 1.33471700  | -2.05184100 | 1.56645300  |
| H  | 0.84690000  | -3.68370700 | 3.08149800  | H  | 1.27383500  | -4.10831600 | 2.16632800  |
| C  | 1.89062500  | -3.29703500 | -0.67587700 | C  | 2.27636200  | -3.22492700 | -0.56652500 |
| H  | 2.84384800  | -5.21480100 | -0.40761800 | H  | 4.26775300  | -3.96662200 | -0.20703400 |
| H  | 3.59039900  | -3.93771300 | 0.53791300  | H  | 4.05500300  | -2.28401600 | 0.21159600  |
| N  | 1.02763400  | -2.45943500 | 0.20902000  | N  | 1.19045300  | -2.44589600 | 0.14163600  |
| C  | 2.61449700  | -1.21239300 | 1.72885100  | C  | 2.17179300  | -0.77519000 | 1.80680700  |
| C  | 0.17766200  | -1.46643500 | 2.27892700  | C  | -0.08434900 | -1.83571500 | 2.12713200  |
| C  | 2.92270800  | -2.49841500 | -1.49576800 | C  | 2.60596100  | -2.63584400 | -1.94495200 |
| C  | 0.93633000  | -4.01471300 | -1.65253700 | C  | 1.71514800  | -4.64991700 | -0.77527900 |
| O  | 0.52646200  | -1.34913000 | -0.50413600 | O  | 0.69311400  | -1.33457900 | -0.65393800 |
| H  | 2.46473500  | -0.31506200 | 1.11815800  | H  | 1.72932700  | 0.08234800  | 1.29068000  |
| H  | 2.75847900  | -0.89358300 | 2.76732900  | H  | 2.18881100  | -0.53856100 | 2.87612800  |
| H  | 3.53678500  | -1.70045300 | 1.40104000  | H  | 3.20568700  | -0.87078500 | 1.46778100  |
| H  | -0.02317100 | -0.47121500 | 1.86845200  | H  | -0.61112600 | -1.03598800 | 1.59647200  |
| H  | -0.72496700 | -2.07116800 | 2.14871000  | H  | -0.67763300 | -2.74889200 | 2.02114100  |
| H  | 0.36609500  | -1.34728200 | 3.35062100  | H  | -0.04114900 | -1.57029600 | 3.18911400  |
| H  | 2.42426400  | -1.83194100 | -2.20636500 | H  | 1.72749800  | -2.57785800 | -2.59191100 |
| H  | 3.59141600  | -1.91611400 | -0.85377200 | H  | 3.04629700  | -1.63753000 | -1.86183800 |
| H  | 3.54257700  | -3.19323700 | -2.07274000 | H  | 3.34354300  | -3.28159400 | -2.43218800 |
| H  | 1.50449900  | -4.62328100 | -2.36466800 | H  | 2.44450400  | -5.27755200 | -1.30029800 |
| H  | 0.24436900  | -4.66937500 | -1.11403900 | H  | 1.47164200  | -5.13578700 | 0.17337100  |
| H  | 0.34723100  | -3.28678700 | -2.21801400 | H  | 0.79868500  | -4.61216200 | -1.37293500 |
| C  | -2.21073200 | 0.04297000  | -1.61051800 | C  | -2.44669700 | 0.43342600  | -1.72427600 |
| H  | -2.37116800 | 1.12437300  | -1.73336500 | H  | -2.68467700 | 1.46471400  | -1.40393200 |
| C  | -3.55671800 | -0.66840700 | -1.48475600 | C  | -3.72891800 | -0.40365000 | -1.69868600 |
| H  | -4.09500300 | -0.55128300 | -2.43463400 | H  | -4.42716800 | 0.00610100  | -2.44047300 |
| H  | -3.37756100 | -1.74461600 | -1.35772000 | H  | -3.48241700 | -1.42238300 | -2.02626100 |
| C  | -4.42877700 | -0.14259600 | -0.33040300 | C  | -4.40694300 | -0.45069500 | -0.31776100 |
| H  | -3.85824400 | -0.24368900 | 0.60443400  | H  | -3.66635200 | -0.80692900 | 0.41281100  |

|                           |             |             |             |                           |             |             |             |
|---------------------------|-------------|-------------|-------------|---------------------------|-------------|-------------|-------------|
| H                         | -4.61786800 | 0.93065900  | -0.47745100 | H                         | -4.69247400 | 0.56852200  | -0.01728600 |
| C                         | -5.73927100 | -0.87266000 | -0.20788400 | C                         | -5.62002700 | -1.34065000 | -0.28881300 |
| H                         | -5.67183100 | -1.94079900 | 0.00985200  | H                         | -5.44034700 | -2.39620800 | -0.50475900 |
| C                         | -6.94531700 | -0.31799400 | -0.35636100 | C                         | -6.86803600 | -0.93683400 | -0.03658900 |
| H                         | -7.00659600 | 0.75032700  | -0.57622700 | H                         | -7.04360100 | 0.12029300  | 0.17583600  |
| C                         | -8.25566000 | -1.04229800 | -0.24389200 | C                         | -8.08046500 | -1.82246100 | -0.01393700 |
| H                         | -8.88058300 | -0.61196500 | 0.55000000  | H                         | -8.57368600 | -1.79641500 | 0.96696900  |
| H                         | -8.83364600 | -0.96252500 | -1.17416200 | H                         | -8.82735800 | -1.49209800 | -0.74808000 |
| H                         | -8.11213200 | -2.10528700 | -0.02366900 | H                         | -7.82377900 | -2.86349400 | -0.23642600 |
| H                         | -1.67850500 | -0.31742300 | -2.50389500 | H                         | -2.08117200 | 0.49980600  | -2.76247900 |
| H                         | -0.64742100 | -1.13869800 | -0.47124900 | H                         | -0.24793000 | -1.55197100 | -0.84220800 |
| <b>12</b>                 |             |             |             | <b>12</b>                 |             |             |             |
| Charge=1 Multiplicity = 1 |             |             |             | Charge=1 Multiplicity = 3 |             |             |             |
| C                         | -3.24749600 | 1.06616200  | -0.27027000 | C                         | -3.23967900 | 0.97851600  | -0.07725600 |
| C                         | -4.42090700 | 1.46966400  | -0.90131500 | C                         | -4.39771200 | 1.45367900  | -0.68641600 |
| C                         | -4.93156100 | 0.67028900  | -1.92341800 | C                         | -4.90388700 | 0.75588000  | -1.78248700 |
| C                         | -4.25574100 | -0.49505500 | -2.27645300 | C                         | -4.23793300 | -0.38280800 | -2.22928300 |
| C                         | -3.08690200 | -0.84057200 | -1.59177800 | C                         | -3.08337700 | -0.80305800 | -1.56263100 |
| N                         | -2.60213800 | -0.06079400 | -0.59843500 | N                         | -2.60451600 | -0.12411000 | -0.49530000 |
| H                         | -5.84058400 | 0.95239600  | -2.44583400 | H                         | -5.80142500 | 1.09636500  | -2.28971500 |
| H                         | -2.78599500 | 1.65789800  | 0.51257000  | H                         | -2.78601800 | 1.49024200  | 0.76405700  |
| H                         | -4.91323800 | 2.38838900  | -0.60125600 | H                         | -4.88198700 | 2.34950500  | -0.31299200 |
| H                         | -4.63069800 | -1.11812300 | -3.07994700 | H                         | -4.60773700 | -0.92703800 | -3.09034300 |
| H                         | -2.09520800 | -4.94725100 | -3.63790000 | H                         | -2.11081800 | -4.73313100 | -3.93937700 |
| C                         | -1.82112800 | -4.15738400 | -2.94520700 | C                         | -1.83315200 | -4.00378800 | -3.18453400 |
| C                         | -0.64298000 | -4.23768600 | -2.20566900 | C                         | -0.65569900 | -4.15058000 | -2.45395300 |
| C                         | -2.65754300 | -3.05394000 | -2.77865600 | C                         | -2.66457900 | -2.91353100 | -2.92858500 |
| C                         | -0.33673200 | -3.20057000 | -1.32595300 | C                         | -0.34445500 | -3.19131600 | -1.49159600 |
| H                         | 0.02622800  | -5.08612100 | -2.29935100 | H                         | 0.00935900  | -4.99171800 | -2.61691700 |
| C                         | -2.28100700 | -2.05177400 | -1.88194200 | C                         | -2.28451900 | -1.99054800 | -1.95249300 |
| H                         | -3.58769100 | -2.98882300 | -3.33121100 | H                         | -3.59434400 | -2.79901600 | -3.47378100 |
| N                         | -1.12930700 | -2.13263400 | -1.18307800 | N                         | -1.13415600 | -2.13621300 | -1.26142500 |
| H                         | 0.54595400  | -3.19948500 | -0.69555200 | H                         | 0.53663700  | -3.24354700 | -0.86101000 |
| C                         | -1.19055300 | -1.11663600 | 4.38309300  | C                         | -1.01343900 | -1.17501100 | 4.41885400  |
| C                         | -0.53007900 | -1.03620200 | 3.18816400  | C                         | -0.39527900 | -1.09868700 | 3.20145100  |
| C                         | -2.61210000 | -0.60902100 | 2.78243400  | C                         | -2.50508400 | -0.75425000 | 2.85706000  |
| N                         | -2.51842300 | -0.84188700 | 4.11275900  | N                         | -2.35864800 | -0.95403100 | 4.18725800  |
| H                         | -0.84960600 | -1.34218900 | 5.38216200  | H                         | -0.63203500 | -1.36579200 | 5.41047200  |
| H                         | 0.50790700  | -1.19487200 | 2.94074600  | H                         | 0.63708000  | -1.23395300 | 2.91954500  |
| H                         | -3.54850700 | -0.37807400 | 2.29560400  | H                         | -3.46468600 | -0.57090500 | 2.39621300  |
| N                         | -1.42969000 | -0.71555900 | 2.19049800  | N                         | -1.33868600 | -0.83319500 | 2.22844000  |
| C                         | -3.61164600 | -0.82505300 | 5.07799500  | C                         | -3.41920100 | -0.95256700 | 5.18880700  |
| H                         | -3.72959000 | -1.81172600 | 5.53427600  | H                         | -3.47115200 | -1.92527600 | 5.68523200  |

|    |             |             |             |    |             |             |             |
|----|-------------|-------------|-------------|----|-------------|-------------|-------------|
| H  | -3.41452300 | -0.08645400 | 5.85971700  | H  | -3.23409900 | -0.17495500 | 5.93484600  |
| H  | -4.53697000 | -0.55901600 | 4.56380300  | H  | -4.37334300 | -0.75388200 | 4.69743400  |
| H  | 4.70949300  | -0.44124400 | -0.51325900 | H  | 4.65813200  | -0.36585800 | -0.49748900 |
| C  | 4.44455200  | -1.50599500 | -0.57015900 | C  | 4.45680200  | -1.44033900 | -0.60801400 |
| C  | 3.19292600  | -1.77630700 | 0.28584500  | C  | 3.22043600  | -1.82419200 | 0.22656600  |
| H  | 4.20029200  | -1.70891900 | -1.62533400 | H  | 4.22858000  | -1.60533700 | -1.67328300 |
| C  | 5.62620800  | -2.34197500 | -0.15780100 | C  | 5.68472300  | -2.22370500 | -0.22881800 |
| C  | 1.96627300  | -0.97136600 | -0.16331100 | C  | 1.95658100  | -1.05251100 | -0.17459600 |
| H  | 3.40372100  | -1.53928900 | 1.33634400  | H  | 3.42027000  | -1.64077100 | 1.28985800  |
| H  | 2.94488700  | -2.84690800 | 0.25773000  | H  | 3.02425900  | -2.90161500 | 0.13271100  |
| H  | 5.49324400  | -3.42392800 | -0.23120400 | H  | 5.61953300  | -3.30637700 | -0.35982200 |
| C  | 6.78986600  | -1.86566700 | 0.29279000  | C  | 6.81323200  | -1.70081500 | 0.25817000  |
| O  | 0.87301200  | -1.25573500 | 0.65792700  | O  | 0.87886700  | -1.43801300 | 0.62937200  |
| H  | 6.91919500  | -0.78354700 | 0.36615900  | H  | 6.87400200  | -0.61807100 | 0.38897300  |
| C  | 7.96647400  | -2.69961100 | 0.71175200  | C  | 8.03659400  | -2.48073800 | 0.64616200  |
| Cu | -0.80545100 | -0.63842500 | 0.20457200  | Cu | -0.80862900 | -0.78788700 | 0.24109500  |
| H  | 8.85422000  | -2.46697700 | 0.10844500  | H  | 8.91260800  | -2.16228200 | 0.06528400  |
| H  | 8.23998700  | -2.50554600 | 1.75766100  | H  | 8.28957800  | -2.32473700 | 1.70358400  |
| H  | 7.75883900  | -3.77001900 | 0.60902700  | H  | 7.89728700  | -3.55521700 | 0.48632400  |
| H  | 2.22822900  | 0.10174400  | -0.14567000 | H  | 2.16724300  | 0.02867700  | -0.09458800 |
| H  | 1.75994300  | -1.21529300 | -1.22758400 | H  | 1.75903500  | -1.24285900 | -1.25174400 |
| H  | 1.67775600  | 2.67335700  | 2.84856200  | H  | 1.65335400  | 2.75564800  | 2.83976500  |
| C  | 1.26712700  | 2.14745500  | 1.98020900  | C  | 1.27381400  | 2.20875200  | 1.97018000  |
| C  | 1.02548900  | 3.16536600  | 0.85580900  | C  | 0.94283000  | 3.21344900  | 0.85626800  |
| H  | 0.34100100  | 1.65593300  | 2.28198800  | H  | 0.39264800  | 1.64228000  | 2.27593900  |
| H  | 1.97909800  | 1.37644500  | 1.67507500  | H  | 2.04160800  | 1.49933200  | 1.64849400  |
| C  | 2.34551500  | 3.88020800  | 0.51281300  | C  | 2.20833200  | 4.01392800  | 0.49454000  |
| N  | 0.56145500  | 2.43322400  | -0.37303900 | N  | 0.50659200  | 2.45506600  | -0.36443300 |
| C  | -0.07665200 | 4.15273400  | 1.29774700  | C  | -0.21205600 | 4.12643000  | 1.32182500  |
| C  | 2.27876100  | 4.81562000  | -0.71320600 | C  | 2.06609200  | 4.93721100  | -0.73435600 |
| H  | 2.66439500  | 4.43937600  | 1.39924900  | H  | 2.50030100  | 4.59701800  | 1.37489400  |
| H  | 3.10829400  | 3.10921400  | 0.35493000  | H  | 3.01870100  | 3.29481000  | 0.32966000  |
| C  | 0.88849100  | 2.89012200  | -1.77438900 | C  | 0.78899600  | 2.92157000  | -1.76888000 |
| O  | -0.34647600 | 1.53074900  | -0.22557800 | O  | -0.30325400 | 1.46537500  | -0.20293600 |
| H  | 0.20789800  | 4.61563200  | 2.24864400  | H  | 0.05859700  | 4.60978500  | 2.26664000  |
| H  | -0.24514000 | 4.95223400  | 0.57199600  | H  | -0.44669400 | 4.91076900  | 0.59753200  |
| H  | -1.01965000 | 3.61793100  | 1.44901700  | H  | -1.11467200 | 3.53043800  | 1.49086900  |
| C  | 1.19812400  | 4.40168100  | -1.73323500 | C  | 1.00390300  | 4.44894600  | -1.74076600 |
| H  | 2.08139700  | 5.84510500  | -0.39623200 | H  | 1.80468300  | 5.95289300  | -0.41897300 |
| H  | 3.26356500  | 4.83396600  | -1.19162900 | H  | 3.04242800  | 5.01815800  | -1.22363200 |
| C  | 2.08788400  | 2.08589800  | -2.31539000 | C  | 2.02872300  | 2.18204200  | -2.31248600 |
| C  | -0.33420800 | 2.64792400  | -2.67168400 | C  | -0.42671900 | 2.59721100  | -2.65007600 |
| H  | 1.49645000  | 4.70666900  | -2.74252900 | H  | 1.27029200  | 4.76830100  | -2.75454700 |
| H  | 0.26214000  | 4.93236900  | -1.52568700 | H  | 0.03809000  | 4.91911300  | -1.52321700 |

|                          |             |             |             |                          |             |             |             |
|--------------------------|-------------|-------------|-------------|--------------------------|-------------|-------------|-------------|
| H                        | 1.86542400  | 1.01575200  | -2.31954700 | H                        | 1.87555400  | 1.09985800  | -2.27851800 |
| H                        | 2.29551300  | 2.39646700  | -3.34538100 | H                        | 2.19830000  | 2.47207700  | -3.35542800 |
| H                        | 2.99568700  | 2.24364300  | -1.72731300 | H                        | 2.93511200  | 2.41597800  | -1.74772100 |
| H                        | -0.54827400 | 1.58318100  | -2.78372400 | H                        | -0.57334100 | 1.52019800  | -2.75239600 |
| H                        | -1.22515600 | 3.13980300  | -2.26920700 | H                        | -1.34160400 | 3.03343200  | -2.23686200 |
| H                        | -0.13014500 | 3.06418200  | -3.66357200 | H                        | -0.26381400 | 3.01964100  | -3.64693500 |
| <b>TS 12-13</b>          |             |             |             | <b>TS 12-13</b>          |             |             |             |
| Charge=1 Multiplicity =1 |             |             |             | Charge=1 Multiplicity =3 |             |             |             |
| C                        | -2.29634100 | 1.69163800  | 1.08653900  | C                        | -2.66913600 | 1.59351000  | 0.11029800  |
| C                        | -3.39255800 | 2.48273800  | 1.41880500  | C                        | -3.63578500 | 2.44321200  | -0.42210800 |
| C                        | -4.60725900 | 2.23316000  | 0.78246600  | C                        | -4.34976800 | 2.01883700  | -1.54146100 |
| C                        | -4.67676300 | 1.21672300  | -0.16645300 | C                        | -4.07045600 | 0.77048700  | -2.09515100 |
| C                        | -3.53434700 | 0.46283300  | -0.45223100 | C                        | -3.08824600 | -0.03035100 | -1.50834900 |
| N                        | -2.36119700 | 0.70131200  | 0.18414200  | N                        | -2.41336100 | 0.38557800  | -0.41009000 |
| H                        | -5.48775400 | 2.82487100  | 1.01356600  | H                        | -5.10876400 | 2.65410100  | -1.98756500 |
| H                        | -1.32060500 | 1.86224900  | 1.52626500  | H                        | -2.06982400 | 1.87772800  | 0.96772800  |
| H                        | -3.28951600 | 3.27428400  | 2.15334600  | H                        | -3.81375700 | 3.41347000  | 0.02859500  |
| H                        | -5.61069000 | 1.01711800  | -0.67820800 | H                        | -4.60170500 | 0.43596700  | -2.97841900 |
| H                        | -5.25074400 | -2.31647400 | -3.82241100 | H                        | -3.30871900 | -3.81600200 | -4.27614400 |
| C                        | -4.41921900 | -2.01548000 | -3.19249000 | C                        | -2.82537300 | -3.27651700 | -3.46747000 |
| C                        | -3.18000300 | -2.64366700 | -3.30206500 | C                        | -1.71875500 | -3.81718900 | -2.81529000 |
| C                        | -4.58320800 | -0.98892600 | -2.26360800 | C                        | -3.31416700 | -2.03279400 | -3.06877900 |
| C                        | -2.14432700 | -2.21841500 | -2.47152200 | C                        | -1.13640600 | -3.08972500 | -1.77937400 |
| H                        | -3.01362300 | -3.44526800 | -4.01369100 | H                        | -1.31266900 | -4.78290800 | -3.09574300 |
| C                        | -3.49676000 | -0.62020100 | -1.46566300 | C                        | -2.67642400 | -1.35797200 | -2.02626100 |
| H                        | -5.54082100 | -0.48953600 | -2.17298200 | H                        | -4.18049300 | -1.60647700 | -3.56120200 |
| N                        | -2.30176700 | -1.23440500 | -1.58086100 | N                        | -1.60352200 | -1.89302800 | -1.40197000 |
| H                        | -1.14987500 | -2.65322700 | -2.50010000 | H                        | -0.28040100 | -3.45120400 | -1.21966100 |
| C                        | -0.37148100 | -3.47311000 | 2.87534800  | C                        | -1.27146800 | -1.60687500 | 4.30736100  |
| C                        | -0.15437000 | -2.91261700 | 1.64625700  | C                        | -0.62895000 | -1.56925900 | 3.10087600  |
| C                        | -1.48452200 | -1.58307900 | 2.70741400  | C                        | -2.59155100 | -0.70796600 | 2.79422500  |
| N                        | -1.22256600 | -2.61517700 | 3.54525500  | N                        | -2.52151900 | -1.05478800 | 4.09958800  |
| H                        | -0.00942900 | -4.38333500 | 3.32898800  | H                        | -0.96350400 | -1.96804200 | 5.27682600  |
| H                        | 0.44750800  | -3.26076800 | 0.82134900  | H                        | 0.35523200  | -1.91024000 | 2.82115800  |
| H                        | -2.13131900 | -0.76104400 | 2.97937000  | H                        | -3.46885800 | -0.25613900 | 2.35484300  |
| N                        | -0.85509900 | -1.72693800 | 1.54959100  | N                        | -1.46444500 | -1.00321800 | 2.15772100  |
| C                        | -1.73544900 | -2.78796600 | 4.89976500  | C                        | -3.57006300 | -0.88920900 | 5.10099700  |
| H                        | -2.29411500 | -3.72467600 | 4.97566500  | H                        | -3.87323000 | -1.86282700 | 5.49518200  |
| H                        | -0.91228000 | -2.79815300 | 5.61945300  | H                        | -3.21178100 | -0.26149800 | 5.92117000  |
| H                        | -2.40296100 | -1.95721500 | 5.13556100  | H                        | -4.43327800 | -0.40917800 | 4.63673200  |
| Cu                       | -0.84564600 | -0.59043300 | -0.23284000 | Cu                       | -0.90258100 | -0.82002400 | 0.17758700  |
| H                        | 1.51716700  | 5.08797500  | -1.10496800 | H                        | 1.88989100  | 4.52048000  | -2.17304300 |
| C                        | 0.85256200  | 4.43731100  | -0.52495500 | C                        | 1.05491000  | 4.12099500  | -1.58556300 |



|   |             |             |             |   |             |             |             |
|---|-------------|-------------|-------------|---|-------------|-------------|-------------|
| C | 1.16368300  | 4.59021200  | 0.97303700  | C | 1.04025800  | 4.78544400  | -0.19957200 |
| C | 1.01180600  | 2.98077100  | -1.06990700 | C | 1.19282100  | 2.56267100  | -1.54950800 |
| H | -0.16644500 | 4.78955300  | -0.72037400 | H | 0.14210500  | 4.39505900  | -2.12667600 |
| H | 0.27364300  | 4.35096800  | 1.56848100  | H | 0.02444900  | 4.77007400  | 0.21420100  |
| C | 2.31392800  | 3.67197300  | 1.38090100  | C | 1.99156800  | 4.06010600  | 0.75019200  |
| H | 1.41045300  | 5.63424600  | 1.19545300  | H | 1.32099200  | 5.84082700  | -0.29174600 |
| N | 0.95967100  | 2.04724200  | 0.10152400  | N | 0.79647000  | 2.10840300  | -0.18244800 |
| C | 1.93754300  | 2.17542700  | 1.23727500  | C | 1.52741000  | 2.60818900  | 1.02931500  |
| H | 2.61138400  | 3.85040000  | 2.42058500  | H | 2.07137500  | 4.58726600  | 1.70798200  |
| H | 3.19556800  | 3.89961800  | 0.76911300  | H | 3.00067700  | 4.05712700  | 0.31938700  |
| O | 0.72783900  | 0.74390400  | -0.25264200 | O | 0.59131200  | 0.73236100  | -0.11378900 |
| C | 3.20943100  | 1.32838100  | 1.04584500  | C | 2.73251400  | 1.73853200  | 1.43769700  |
| H | 2.98401200  | 0.25878500  | 1.04468200  | H | 2.41891400  | 0.73695200  | 1.74486800  |
| H | 3.73579800  | 1.57647700  | 0.12099700  | H | 3.46477100  | 1.64163700  | 0.63188500  |
| H | 3.89526200  | 1.52155900  | 1.87803000  | H | 3.23922400  | 2.20506400  | 2.29000500  |
| C | 1.22226400  | 1.69491900  | 2.51507900  | C | 0.51009300  | 2.60679600  | 2.18828900  |
| H | 1.93042200  | 1.65858400  | 3.34986000  | H | 0.99485700  | 2.90934100  | 3.12327100  |
| H | 0.41162600  | 2.37549500  | 2.79922600  | H | -0.31014600 | 3.30659800  | 1.99164800  |
| H | 0.81092900  | 0.69035900  | 2.37798000  | H | 0.09235900  | 1.60594200  | 2.33448000  |
| C | 2.31589100  | 2.83426400  | -1.88900300 | C | 2.61900900  | 2.12899000  | -1.96338300 |
| H | 2.48357100  | 1.79478700  | -2.19105200 | H | 2.75575900  | 1.04802000  | -1.85478700 |
| H | 2.23986100  | 3.43226400  | -2.80392500 | H | 2.78687400  | 2.37653500  | -3.01780800 |
| H | 3.19692700  | 3.18340300  | -1.34457200 | H | 3.39597100  | 2.63517000  | -1.38440000 |
| C | -0.17277400 | 2.66663500  | -1.99896700 | C | 0.20036300  | 1.96042700  | -2.55992300 |
| H | -0.06717000 | 1.69529000  | -2.48919800 | H | 0.31227400  | 0.87641600  | -2.64858000 |
| H | -1.11682300 | 2.68001000  | -1.44666400 | H | -0.83017900 | 2.18594300  | -2.26674800 |
| H | -0.22431800 | 3.43419700  | -2.77828200 | H | 0.37832300  | 2.40166800  | -3.54660900 |
| H | 1.53348500  | 0.05037300  | -0.88817800 | H | 1.48544100  | -0.04855300 | -0.23694800 |
| C | 1.60610200  | -1.19170700 | -1.51379900 | C | 1.68920600  | -1.48342900 | -0.31858000 |
| H | 1.64262300  | -0.83426200 | -2.56234500 | H | 1.50173600  | -1.55374800 | -1.40896500 |
| O | 0.45077900  | -1.69383400 | -1.13086900 | O | 0.65116700  | -1.84920400 | 0.46491800  |
| C | 2.87442900  | -1.89406800 | -1.04517400 | C | 3.03427900  | -2.03533700 | 0.10389300  |
| H | 2.92542200  | -1.88936200 | 0.05121400  | H | 3.23430500  | -1.74736100 | 1.14387100  |
| H | 2.78320400  | -2.95251700 | -1.33722100 | H | 2.97150100  | -3.13644900 | 0.10531500  |
| C | 4.16644900  | -1.31242000 | -1.64641000 | C | 4.20157700  | -1.59293900 | -0.79873900 |
| H | 4.06266900  | -1.29911300 | -2.74273000 | H | 3.94971600  | -1.83812000 | -1.84297000 |
| H | 4.28995900  | -0.26797100 | -1.33354400 | H | 4.31420100  | -0.50219300 | -0.75343100 |
| C | 5.39054200  | -2.10171500 | -1.26629300 | C | 5.50291800  | -2.25087200 | -0.42629800 |
| H | 5.40317700  | -3.14597900 | -1.58639500 | H | 5.52372600  | -3.34087500 | -0.49572500 |
| C | 6.43053700  | -1.62420100 | -0.57755500 | C | 6.60046400  | -1.60882700 | -0.01747100 |
| H | 6.41363800  | -0.57860800 | -0.26195000 | H | 6.57414700  | -0.51906000 | 0.05131000  |
| C | 7.65429400  | -2.40697200 | -0.19747800 | C | 7.89945500  | -2.26152400 | 0.35827200  |
| H | 8.56092700  | -1.95673500 | -0.62313500 | H | 8.72089200  | -1.90661000 | -0.27834200 |
| H | 7.79500100  | -2.42243600 | 0.89168200  | H | 8.18022400  | -2.02228400 | 1.39276100  |

|                           |             |             |             |                           |             |             |             |
|---------------------------|-------------|-------------|-------------|---------------------------|-------------|-------------|-------------|
| H                         | 7.59528800  | -3.44306300 | -0.54698800 | H                         | 7.84523900  | -3.35126400 | 0.26481700  |
| <b>13</b>                 |             |             |             | <b>13</b>                 |             |             |             |
| Charge=1 Multiplicity = 1 |             |             |             | Charge=1 Multiplicity = 3 |             |             |             |
| C                         | -3.06087700 | 1.88644800  | -0.95186400 | C                         | -2.89715100 | 1.13338800  | -0.29582400 |
| C                         | -3.74470100 | 2.59633800  | -1.93234000 | C                         | -3.99296500 | 1.65607900  | -0.97846700 |
| C                         | -4.07704300 | 1.94458000  | -3.12094200 | C                         | -4.57330900 | 0.89109100  | -1.98866600 |
| C                         | -3.70749200 | 0.61273200  | -3.28092600 | C                         | -4.03876100 | -0.36073100 | -2.28785700 |
| C                         | -3.02600000 | -0.04055300 | -2.24908500 | C                         | -2.94021000 | -0.82413200 | -1.56024800 |
| N                         | -2.71224400 | 0.59319600  | -1.08809900 | N                         | -2.39387500 | -0.07780200 | -0.57060000 |
| H                         | -4.60524800 | 2.46616300  | -3.91308900 | H                         | -5.42635700 | 1.26553000  | -2.54616700 |
| H                         | -2.77140400 | 2.35475500  | -0.01807100 | H                         | -2.38923600 | 1.69447400  | 0.47993400  |
| H                         | -4.00923500 | 3.63505500  | -1.76431300 | H                         | -4.37064900 | 2.64080800  | -0.72581900 |
| H                         | -3.92627800 | 0.09511900  | -4.20802700 | H                         | -4.46687900 | -0.95831700 | -3.08394600 |
| H                         | -2.96853700 | -4.38353400 | -4.00021300 | H                         | -2.35182000 | -5.04616800 | -3.52468700 |
| C                         | -2.59261200 | -3.66440600 | -3.27905200 | C                         | -2.01085300 | -4.28132200 | -2.83372200 |
| C                         | -1.62806800 | -4.03097500 | -2.33892900 | C                         | -0.86066600 | -4.47528500 | -2.07122900 |
| C                         | -3.07322400 | -2.35886300 | -3.27199600 | C                         | -2.72902600 | -3.09392500 | -2.69788100 |
| C                         | -1.19247700 | -3.07490400 | -1.42877400 | C                         | -0.46483000 | -3.46620800 | -1.19527800 |
| H                         | -1.21932600 | -5.03562900 | -2.30998300 | H                         | -0.27918800 | -5.38762700 | -2.14634200 |
| C                         | -2.57743100 | -1.44789500 | -2.33300900 | C                         | -2.27012500 | -2.12489500 | -1.80300000 |
| H                         | -3.84057700 | -2.05891600 | -3.97677600 | H                         | -3.63199500 | -2.93604800 | -3.27597700 |
| N                         | -1.64581200 | -1.80850900 | -1.41167100 | N                         | -1.15007900 | -2.32243400 | -1.07294900 |
| H                         | -0.44652700 | -3.31913900 | -0.67816600 | H                         | 0.41221300  | -3.55208400 | -0.56373100 |
| C                         | -1.24361800 | -2.24478900 | 3.81975500  | C                         | -1.12495800 | -0.92624100 | 4.47067900  |
| C                         | -0.70198500 | -1.73594300 | 2.67034400  | C                         | -0.44831600 | -0.97949600 | 3.28365400  |
| C                         | -2.84429900 | -1.49517700 | 2.51002300  | C                         | -2.52260100 | -0.58003000 | 2.80701000  |
| N                         | -2.60993100 | -2.08645600 | 3.70665900  | N                         | -2.44633600 | -0.67178100 | 4.15420600  |
| H                         | -0.79425000 | -2.69617500 | 4.69133700  | H                         | -0.79796200 | -1.04493400 | 5.49249500  |
| H                         | 0.33427000  | -1.67814500 | 2.37052300  | H                         | 0.59275300  | -1.17193200 | 3.07780700  |
| H                         | -3.83707600 | -1.24876800 | 2.16263100  | H                         | -3.44890400 | -0.39016400 | 2.28462600  |
| N                         | -1.71392900 | -1.26762400 | 1.85161100  | N                         | -1.33311800 | -0.76078800 | 2.24563200  |
| C                         | -3.61228900 | -2.47533200 | 4.69243500  | C                         | -3.55030900 | -0.53584800 | 5.09891600  |
| H                         | -3.56021800 | -3.55106000 | 4.88105700  | H                         | -3.66696300 | -1.45624600 | 5.67710900  |
| H                         | -3.45290200 | -1.93459400 | 5.62932000  | H                         | -3.36408100 | 0.29918800  | 5.77950900  |
| H                         | -4.60319800 | -2.23090200 | 4.30595900  | H                         | -4.47139100 | -0.34522400 | 4.54536100  |
| Cu                        | -1.52468100 | -0.46637100 | 0.08616600  | Cu                        | -0.72958600 | -0.85161100 | 0.27571600  |
| H                         | 1.92350600  | 4.57449700  | -1.11125700 | H                         | 1.21233600  | 4.66610800  | -2.68587900 |
| C                         | 0.95032000  | 4.12432500  | -0.88213000 | C                         | 0.40934500  | 4.21850800  | -2.08864000 |
| C                         | 0.34495900  | 4.81212800  | 0.35289100  | C                         | 0.19717200  | 5.04350300  | -0.80796900 |
| C                         | 1.16021100  | 2.58158600  | -0.72054900 | C                         | 0.77922300  | 2.71962900  | -1.83494100 |
| H                         | 0.31160000  | 4.31487000  | -1.75141400 | H                         | -0.49566200 | 4.27053600  | -2.70410000 |
| H                         | -0.74805500 | 4.72787000  | 0.33269200  | H                         | -0.83704500 | 4.93624200  | -0.45938400 |
| C                         | 0.88400600  | 4.17939700  | 1.63465000  | C                         | 1.15695500  | 4.58794000  | 0.28944900  |

|                                         |             |             |             |                                         |             |             |             |
|-----------------------------------------|-------------|-------------|-------------|-----------------------------------------|-------------|-------------|-------------|
| H                                       | 0.57425000  | 5.88352300  | 0.32996500  | H                                       | 0.34218200  | 6.10788100  | -1.02433900 |
| N                                       | 0.26254200  | 2.14364600  | 0.38975400  | N                                       | 0.31057500  | 2.38873100  | -0.45365300 |
| C                                       | 0.45027300  | 2.69638400  | 1.77336600  | C                                       | 0.88120200  | 3.12633500  | 0.72811400  |
| H                                       | 0.53572400  | 4.72338200  | 2.52035200  | H                                       | 1.08012300  | 5.23243500  | 1.17281900  |
| H                                       | 1.97906200  | 4.25449100  | 1.64182200  | H                                       | 2.18924600  | 4.68336500  | -0.06947200 |
| O                                       | 0.18929200  | 0.70559000  | 0.45464800  | O                                       | 0.40235400  | 0.97709200  | -0.22262400 |
| C                                       | 1.47087400  | 1.93541500  | 2.64762000  | C                                       | 2.16631700  | 2.50613700  | 1.31673000  |
| H                                       | 1.12565600  | 0.92547800  | 2.88873900  | H                                       | 1.98059500  | 1.52143900  | 1.75690200  |
| H                                       | 2.45714900  | 1.86589700  | 2.18095500  | H                                       | 2.96590300  | 2.41130800  | 0.57668000  |
| H                                       | 1.59418600  | 2.47216200  | 3.59465700  | H                                       | 2.53911400  | 3.15615900  | 2.11590900  |
| C                                       | -0.92637200 | 2.61781700  | 2.46087700  | C                                       | -0.21017200 | 3.10853800  | 1.81589700  |
| H                                       | -0.85390900 | 2.94442100  | 3.50456400  | H                                       | 0.15117700  | 3.59078300  | 2.73114900  |
| H                                       | -1.65426000 | 3.26066200  | 1.95437200  | H                                       | -1.10501800 | 3.64471300  | 1.48064400  |
| H                                       | -1.30170800 | 1.59023800  | 2.44982600  | H                                       | -0.48932200 | 2.08017500  | 2.06688700  |
| C                                       | 2.65818300  | 2.25277900  | -0.50989000 | C                                       | 2.28749600  | 2.47476100  | -2.08006300 |
| H                                       | 2.80996400  | 1.18772700  | -0.30100400 | H                                       | 2.58470600  | 1.45129200  | -1.81972200 |
| H                                       | 3.21570300  | 2.48578000  | -1.42396400 | H                                       | 2.51203000  | 2.61142400  | -3.14378600 |
| H                                       | 3.10653600  | 2.83247600  | 0.30119700  | H                                       | 2.92210200  | 3.16938400  | -1.52410000 |
| C                                       | 0.69752500  | 1.88659000  | -2.01368900 | C                                       | -0.01443900 | 1.84912800  | -2.82606000 |
| H                                       | 0.89425700  | 0.81101500  | -1.99851800 | H                                       | 0.27338400  | 0.79557600  | -2.77148800 |
| H                                       | -0.37375100 | 2.04156300  | -2.16993300 | H                                       | -1.08858600 | 1.93189000  | -2.63109400 |
| H                                       | 1.23481200  | 2.31742900  | -2.86569300 | H                                       | 0.17557100  | 2.19793600  | -3.84684600 |
| C                                       | 3.38683500  | -1.70140800 | 1.29984800  | C                                       | 1.97305000  | -1.33511700 | -0.08914600 |
| H                                       | 3.41310400  | -2.70054900 | 1.78294200  | H                                       | 1.74022600  | -1.41761100 | -1.16381000 |
| O                                       | 2.31253500  | -1.13633000 | 1.16621800  | O                                       | 0.95322600  | -1.51881400 | 0.76701200  |
| C                                       | 4.71649100  | -1.17533000 | 0.85003000  | C                                       | 3.32250800  | -1.83874700 | 0.34498200  |
| H                                       | 4.59416100  | -0.19544300 | 0.38046900  | H                                       | 3.51553300  | -1.51018100 | 1.37474700  |
| H                                       | 5.33733500  | -1.04759000 | 1.75054600  | H                                       | 3.32365800  | -2.94469100 | 0.38484100  |
| C                                       | 5.43326900  | -2.16925200 | -0.10406900 | C                                       | 4.46716500  | -1.36961000 | -0.57528900 |
| H                                       | 5.49356500  | -3.14968400 | 0.39169400  | H                                       | 4.22971500  | -1.66921700 | -1.60873900 |
| H                                       | 4.82850800  | -2.30686500 | -1.00859000 | H                                       | 4.51232400  | -0.27271600 | -0.57254100 |
| C                                       | 6.81234000  | -1.69504900 | -0.47541300 | C                                       | 5.80372700  | -1.93664100 | -0.18051100 |
| H                                       | 7.52126700  | -1.59389100 | 0.34874000  | H                                       | 5.88578400  | -3.02585800 | -0.20150300 |
| C                                       | 7.20544200  | -1.39810300 | -1.71676700 | C                                       | 6.86465600  | -1.21748700 | 0.19539300  |
| H                                       | 6.48701000  | -1.50375400 | -2.53247400 | H                                       | 6.77804300  | -0.12886100 | 0.21621300  |
| C                                       | 8.57870100  | -0.93269200 | -2.10375200 | C                                       | 8.19845100  | -1.77977600 | 0.59517300  |
| H                                       | 9.04242500  | -1.62540500 | -2.81816100 | H                                       | 8.99859300  | -1.40922100 | -0.05950300 |
| H                                       | 8.53939400  | 0.04686300  | -2.59822700 | H                                       | 8.46684900  | -1.47932100 | 1.61694900  |
| H                                       | 9.23853000  | -0.84950800 | -1.23411700 | H                                       | 8.20453100  | -2.87399400 | 0.55097700  |
| H                                       | 1.06559600  | 0.33394300  | 0.69213200  | H                                       | 1.34412100  | 0.66351500  | -0.20516300 |
| <b>12'</b><br>Charge=1 Multiplicity = 1 |             |             |             | <b>12'</b><br>Charge=1 Multiplicity = 3 |             |             |             |
| C                                       | 2.64183000  | -0.58419900 | -2.12633500 | C                                       | 2.09290700  | -1.15044500 | -2.38023700 |

|    |             |             |             |    |             |             |             |
|----|-------------|-------------|-------------|----|-------------|-------------|-------------|
| C  | 3.87937700  | -1.00084000 | -2.61345000 | C  | 3.05842300  | -1.96911500 | -2.96361000 |
| C  | 4.53123000  | -2.04957900 | -1.96676500 | C  | 3.54584800  | -3.05065300 | -2.23189700 |
| C  | 3.93270500  | -2.64943300 | -0.85881200 | C  | 3.06300200  | -3.28253600 | -0.94343500 |
| C  | 2.68565300  | -2.18759300 | -0.43546100 | C  | 2.09038200  | -2.42641600 | -0.42565900 |
| N  | 2.06173900  | -1.17686000 | -1.07736700 | N  | 1.61684100  | -1.39202500 | -1.15326200 |
| H  | 5.50007300  | -2.39555100 | -2.31353800 | H  | 4.30210600  | -3.70608100 | -2.65278800 |
| H  | 2.08520500  | 0.24643600  | -2.54887100 | H  | 1.68009300  | -0.26878500 | -2.86098900 |
| H  | 4.31846100  | -0.50648500 | -3.47303200 | H  | 3.42084500  | -1.75349700 | -3.96271400 |
| H  | 4.43640400  | -3.45496900 | -0.33714000 | H  | 3.44716900  | -4.11111800 | -0.35997100 |
| H  | 1.88108700  | -5.03728100 | 3.20239300  | H  | 1.50805700  | -4.25766900 | 3.85363500  |
| C  | 1.56305900  | -4.20802300 | 2.57816000  | C  | 1.24934400  | -3.50023900 | 3.12023600  |
| C  | 0.35950100  | -3.55072700 | 2.82727500  | C  | 0.32553500  | -2.50193500 | 3.42476200  |
| C  | 2.35503700  | -3.79333300 | 1.50961100  | C  | 1.84326700  | -3.51662600 | 1.85971100  |
| C  | -0.00481600 | -2.49803200 | 1.99347400  | C  | 0.02424800  | -1.55763300 | 2.44812800  |
| H  | -0.28885800 | -3.84498200 | 3.64519300  | H  | -0.15565900 | -2.45185100 | 4.39525700  |
| C  | 1.93076200  | -2.72309000 | 0.72021200  | C  | 1.50155000  | -2.53191200 | 0.93128200  |
| H  | 3.28737700  | -4.30158100 | 1.29366100  | H  | 2.56387700  | -4.28569100 | 1.60809200  |
| N  | 0.76202600  | -2.08485300 | 0.97620100  | N  | 0.59680200  | -1.56766800 | 1.23471700  |
| H  | -0.94041000 | -1.96401100 | 2.11699600  | H  | -0.69485100 | -0.76476100 | 2.62005400  |
| Cu | 0.30755800  | -0.57378500 | -0.26603400 | Cu | 0.24166600  | -0.24166500 | -0.23614100 |
| O  | 0.40025100  | 0.96825400  | -1.20160300 | O  | 0.43168200  | 1.07281800  | -1.49520900 |
| C  | -0.22924100 | 2.13066600  | -0.77385200 | C  | 0.33439500  | 2.41636400  | -1.08718200 |
| C  | 0.55834700  | 2.90221600  | 0.28991900  | C  | 1.36904400  | 2.82157300  | -0.02852600 |
| H  | -0.03539400 | 3.76390800  | 0.62532200  | H  | 1.17382300  | 3.85489400  | 0.28890000  |
| H  | 0.69768900  | 2.25557500  | 1.16970200  | H  | 1.21943400  | 2.19660200  | 0.86904100  |
| C  | 1.92991800  | 3.38989100  | -0.21395000 | C  | 2.82672700  | 2.69921700  | -0.50657100 |
| H  | 2.48260700  | 2.51511600  | -0.58662600 | H  | 2.97871400  | 1.67883600  | -0.88837900 |
| H  | 1.78313500  | 4.05684000  | -1.07427300 | H  | 2.98327000  | 3.37466200  | -1.35825800 |
| C  | 2.73156800  | 4.09559200  | 0.84521100  | C  | 3.83162000  | 2.99891200  | 0.57251500  |
| H  | 2.98664800  | 3.50358500  | 1.72783300  | H  | 3.79645500  | 2.35079100  | 1.45264300  |
| C  | 3.13345800  | 5.36840300  | 0.78631900  | C  | 4.73236200  | 3.98477700  | 0.53926400  |
| H  | 2.87506400  | 5.95743000  | -0.09623900 | H  | 4.76414700  | 4.63391200  | -0.33823200 |
| C  | 3.93003600  | 6.07937400  | 1.84187300  | C  | 5.73007000  | 4.28859600  | 1.61963500  |
| H  | 4.88502100  | 6.44383100  | 1.44038600  | H  | 6.75893600  | 4.22306000  | 1.24113800  |
| H  | 3.39335500  | 6.96071800  | 2.21755500  | H  | 5.60323700  | 5.31038400  | 2.00153500  |
| H  | 4.14755100  | 5.42586700  | 2.69344300  | H  | 5.63478200  | 3.59718000  | 2.46391500  |
| H  | -5.56341200 | 1.78566300  | -1.18918700 | H  | -5.97011100 | 1.10630400  | -1.56248400 |
| C  | -5.27963000 | 0.99525600  | -0.48700400 | C  | -5.54634900 | 0.58382600  | -0.69901900 |
| C  | -4.28727300 | 1.58143300  | 0.53906700  | C  | -4.86237100 | 1.62189100  | 0.21326300  |
| C  | -4.71432400 | -0.21954400 | -1.25086600 | C  | -4.58810100 | -0.52921700 | -1.16699700 |
| H  | -6.20581400 | 0.68996500  | 0.01099600  | H  | -6.39331000 | 0.12023700  | -0.18289900 |
| H  | -4.82686900 | 2.01031700  | 1.39026200  | H  | -5.58595700 | 2.04151400  | 0.92023200  |
| C  | -3.26476100 | 0.57058000  | 1.08481400  | C  | -3.67324400 | 1.08511100  | 1.03282300  |
| H  | -3.72692100 | 2.40867400  | 0.08799500  | H  | -4.50261300 | 2.46709300  | -0.38348300 |

|                          |             |             |             |                          |             |             |             |
|--------------------------|-------------|-------------|-------------|--------------------------|-------------|-------------|-------------|
| C                        | -3.18067100 | -0.22142800 | -1.44995300 | C                        | -3.10246400 | -0.11828500 | -1.26469100 |
| H                        | -5.16482100 | -0.27587200 | -2.24787500 | H                        | -4.88961800 | -0.89461200 | -2.15440900 |
| H                        | -4.99619800 | -1.14961400 | -0.74700000 | H                        | -4.65470900 | -1.39229100 | -0.49410600 |
| N                        | -2.51223700 | 0.01852500  | -0.10312200 | N                        | -2.70461100 | 0.43417100  | 0.08083800  |
| C                        | -3.93794500 | -0.58953600 | 1.85776100  | C                        | -4.11446100 | 0.04606500  | 2.08464200  |
| C                        | -2.29511400 | 1.27985600  | 2.04285300  | C                        | -2.96175000 | 2.25866400  | 1.72688000  |
| C                        | -2.74803400 | -1.59308700 | -1.99016100 | C                        | -2.26672300 | -1.36870900 | -1.57943200 |
| C                        | -2.76275700 | 0.87253600  | -2.45223700 | C                        | -2.85837900 | 0.94600300  | -2.35507700 |
| O                        | -1.49560800 | -0.73886600 | 0.18555800  | O                        | -1.50099200 | 0.28454100  | 0.54520600  |
| H                        | -3.18607900 | -1.29942600 | 2.21540200  | H                        | -3.24428000 | -0.37004900 | 2.60142300  |
| H                        | -4.45932500 | -0.18332300 | 2.73054100  | H                        | -4.74877400 | 0.53518700  | 2.83103800  |
| H                        | -4.66575500 | -1.13934000 | 1.25957100  | H                        | -4.68374900 | -0.77843600 | 1.64779600  |
| H                        | -1.49022100 | 0.61622900  | 2.36971000  | H                        | -2.14376800 | 1.91815100  | 2.36448900  |
| H                        | -1.85371300 | 2.17088100  | 1.59216600  | H                        | -2.55888100 | 2.96442900  | 0.99406300  |
| H                        | -2.84854500 | 1.59539700  | 2.93252600  | H                        | -3.68646900 | 2.79027300  | 2.35133100  |
| H                        | -1.68543800 | -1.61552600 | -2.24500900 | H                        | -1.24216800 | -1.11364800 | -1.86036900 |
| H                        | -2.95161200 | -2.39295600 | -1.27203400 | H                        | -2.25758300 | -2.07394500 | -0.74206600 |
| H                        | -3.31348300 | -1.79933900 | -2.90424900 | H                        | -2.71373100 | -1.87483700 | -2.44045000 |
| H                        | -3.22880800 | 0.66012900  | -3.42045000 | H                        | -3.14337300 | 0.52553800  | -3.32604400 |
| H                        | -3.08558200 | 1.86792900  | -2.13583700 | H                        | -3.45154100 | 1.84957500  | -2.19587100 |
| H                        | -1.67869800 | 0.87920900  | -2.58434800 | H                        | -1.79817000 | 1.20986400  | -2.38867700 |
| H                        | -1.25222400 | 1.89652800  | -0.40359800 | H                        | -0.67516100 | 2.64846800  | -0.70298100 |
| H                        | -0.39601400 | 2.77285600  | -1.65520500 | H                        | 0.47318200  | 3.04470200  | -1.98219300 |
| <b>TS 12'-13'</b>        |             |             |             | <b>TS 12'-13'</b>        |             |             |             |
| Charge=1 Multiplicity =1 |             |             |             | Charge=1 Multiplicity =3 |             |             |             |
| C                        | 0.74406300  | -3.57911100 | 1.02685700  | C                        | 3.18432100  | -1.17940100 | -1.43618800 |
| C                        | 1.33501900  | -4.83697400 | 1.12861900  | C                        | 4.33252400  | -1.95605600 | -1.57231500 |
| C                        | 2.62028200  | -5.01029400 | 0.61881500  | C                        | 4.39912300  | -3.17332700 | -0.89698500 |
| C                        | 3.27461000  | -3.92944800 | 0.02739800  | C                        | 3.32090800  | -3.58270500 | -0.11190900 |
| C                        | 2.62157500  | -2.69787900 | -0.03500300 | C                        | 2.20133200  | -2.75657400 | -0.01868600 |
| N                        | 1.37585000  | -2.54342300 | 0.46432800  | N                        | 2.15491400  | -1.57217500 | -0.67197400 |
| H                        | 3.11266100  | -5.97608200 | 0.67748600  | H                        | 5.27830200  | -3.80446500 | -0.98188700 |
| H                        | -0.25687900 | -3.36554500 | 1.38880100  | H                        | 3.05270700  | -0.22674900 | -1.93695800 |
| H                        | 0.79570100  | -5.65459200 | 1.59416300  | H                        | 5.14867400  | -1.60931200 | -2.19638700 |
| H                        | 4.27330800  | -4.05381700 | -0.37436200 | H                        | 3.35522900  | -4.53344900 | 0.40696600  |
| H                        | 5.90160100  | -0.11642600 | -2.17332500 | H                        | -0.48827700 | -5.22812400 | 2.92307900  |
| C                        | 4.91682400  | -0.18343600 | -1.72132100 | C                        | -0.36091200 | -4.36582100 | 2.27596200  |
| C                        | 4.08917100  | 0.93453100  | -1.64763500 | C                        | -1.38483800 | -3.43407400 | 2.12242400  |
| C                        | 4.46806800  | -1.39616300 | -1.20108800 | C                        | 0.83852400  | -4.17972400 | 1.58902000  |
| C                        | 2.83561100  | 0.79544300  | -1.05800200 | C                        | -1.17624100 | -2.34113900 | 1.28429800  |
| H                        | 4.40187000  | 1.89810900  | -2.03484200 | H                        | -2.33155900 | -3.54313200 | 2.63997400  |
| C                        | 3.19850400  | -1.46545400 | -0.62615400 | C                        | 0.98220500  | -3.06535200 | 0.76369800  |
| H                        | 5.10303500  | -2.27305900 | -1.24485600 | H                        | 1.64833400  | -4.89042700 | 1.70389200  |

|    |             |             |             |    |             |             |             |
|----|-------------|-------------|-------------|----|-------------|-------------|-------------|
| N  | 2.39586400  | -0.37228500 | -0.56694600 | N  | -0.02354700 | -2.16515500 | 0.61916000  |
| H  | 2.15122100  | 1.63136100  | -0.95070500 | H  | -1.93252400 | -1.57939000 | 1.11399200  |
| Cu | 0.60196500  | -0.70719300 | 0.21779800  | Cu | 0.44617300  | -0.58386600 | -0.48711100 |
| O  | -1.07174700 | -1.32625500 | 0.83387200  | O  | 0.94377000  | 0.77938000  | -1.65432600 |
| C  | -2.09098400 | -0.50181500 | 0.94552200  | C  | 0.57283100  | 2.00799600  | -1.22890900 |
| C  | -3.23874600 | -0.64073700 | -0.03452200 | C  | 1.29981300  | 2.61842800  | -0.04113100 |
| H  | -3.90538700 | 0.22709100  | 0.04124700  | H  | 0.76816100  | 3.51998600  | 0.28549400  |
| H  | -2.84092000 | -0.66742100 | -1.05682700 | H  | 1.28880300  | 1.91646600  | 0.80544800  |
| C  | -4.05860200 | -1.93475400 | 0.22777500  | C  | 2.76920000  | 2.99267900  | -0.37872300 |
| H  | -3.36204400 | -2.78312300 | 0.17247500  | H  | 3.28387800  | 2.07794000  | -0.70685700 |
| H  | -4.45717300 | -1.91319800 | 1.25002700  | H  | 2.77956200  | 3.68427400  | -1.23025600 |
| C  | -5.17877400 | -2.10713300 | -0.75873400 | C  | 3.48415300  | 3.60589200  | 0.79229500  |
| H  | -4.88303700 | -2.22584600 | -1.80349500 | H  | 3.60161100  | 2.96950400  | 1.67250100  |
| C  | -6.47894200 | -2.11214200 | -0.44873300 | C  | 3.95839100  | 4.85526000  | 0.82971300  |
| H  | -6.76779400 | -1.99123800 | 0.59748400  | H  | 3.83506000  | 5.48734800  | -0.05202900 |
| C  | -7.60434700 | -2.28360700 | -1.42679100 | C  | 4.66804400  | 5.48062600  | 1.99478500  |
| H  | -8.21087500 | -3.16531200 | -1.18112300 | H  | 5.68024500  | 5.80153700  | 1.71548900  |
| H  | -8.28407200 | -1.42137400 | -1.40323500 | H  | 4.14096500  | 6.37920700  | 2.34190900  |
| H  | -7.23640700 | -2.39930900 | -2.45159800 | H  | 4.75139900  | 4.78741400  | 2.83841900  |
| H  | -1.23388400 | 5.57746500  | 1.39501400  | H  | -5.40371000 | 2.19932100  | -1.47476100 |
| C  | -0.56465500 | 5.17947200  | 0.62505700  | C  | -5.14773900 | 1.54165800  | -0.63729100 |
| C  | -1.38439300 | 4.29421000  | -0.33728700 | C  | -4.14525100 | 2.26919100  | 0.28200600  |
| C  | 0.60856500  | 4.41963000  | 1.27747100  | C  | -4.59753700 | 0.20050000  | -1.16011200 |
| H  | -0.16617200 | 6.05036500  | 0.09402800  | H  | -6.08649700 | 1.35337200  | -0.10548900 |
| H  | -1.81492200 | 4.90522900  | -1.13861500 | H  | -4.68089700 | 2.86461600  | 1.03038100  |
| C  | -0.57505100 | 3.14832000  | -0.98634500 | C  | -3.17125100 | 1.32633000  | 1.02345500  |
| H  | -2.23745800 | 3.85268500  | 0.18985100  | H  | -3.55378800 | 2.98639700  | -0.29762600 |
| C  | 0.35774000  | 2.91094500  | 1.45928400  | C  | -3.06415000 | 0.16681000  | -1.31833500 |
| H  | 0.83848200  | 4.84346700  | 2.26102200  | H  | -5.04046600 | -0.04143000 | -2.13238700 |
| H  | 1.51834800  | 4.54421000  | 0.67951600  | H  | -4.88785800 | -0.61531300 | -0.48846600 |
| N  | 0.11587200  | 2.32657700  | 0.09272700  | N  | -2.47608200 | 0.37771400  | 0.05078400  |
| C  | 0.50671800  | 3.71315100  | -1.93205900 | C  | -3.93153800 | 0.45129100  | 2.04388100  |
| C  | -1.52173100 | 2.27240000  | -1.81816100 | C  | -2.15266300 | 2.17635700  | 1.79667800  |
| C  | 1.62506100  | 2.24417300  | 2.02227900  | C  | -2.64941900 | -1.23926100 | -1.78762600 |
| C  | -0.80886300 | 2.66041200  | 2.44009900  | C  | -2.59669700 | 1.19019800  | -2.37776800 |
| O  | -0.31248200 | 1.01425800  | 0.17993900  | O  | -1.08179200 | 0.61130800  | -0.00566900 |
| H  | 1.02312700  | 2.90134000  | -2.45565500 | H  | -3.23060700 | -0.17138500 | 2.61101700  |
| H  | 0.04058700  | 4.35082700  | -2.69119600 | H  | -4.46686100 | 1.08672900  | 2.75836600  |
| H  | 1.25379400  | 4.31363600  | -1.40725500 | H  | -4.66384100 | -0.20576900 | 1.56868300  |
| H  | -0.99821000 | 1.43681400  | -2.29114700 | H  | -1.43626900 | 1.55924900  | 2.34483500  |
| H  | -2.34939900 | 1.87436300  | -1.22565200 | H  | -1.59751100 | 2.85494400  | 1.14356400  |
| H  | -1.95261000 | 2.89009800  | -2.61244700 | H  | -2.69784700 | 2.78855900  | 2.52257800  |
| H  | 1.52646900  | 1.15360600  | 2.01008400  | H  | -1.55937100 | -1.35106800 | -1.78051500 |
| H  | 2.50862000  | 2.51578600  | 1.43565700  | H  | -3.07731000 | -2.01542200 | -1.14490200 |

|                           |             |             |             |                           |             |             |             |
|---------------------------|-------------|-------------|-------------|---------------------------|-------------|-------------|-------------|
| H                         | 1.79498900  | 2.55394900  | 3.05828400  | H                         | -2.98781900 | -1.41789600 | -2.81321100 |
| H                         | -0.59872200 | 3.17634400  | 3.38267900  | H                         | -3.18226900 | 1.04661200  | -3.29225700 |
| H                         | -1.76758800 | 3.02987700  | 2.06845400  | H                         | -2.73050300 | 2.22753300  | -2.06206600 |
| H                         | -0.91677000 | 1.59688200  | 2.67028400  | H                         | -1.54587800 | 1.04225800  | -2.63894300 |
| H                         | -1.40719500 | 0.69234800  | 0.58715800  | H                         | -0.65245000 | 1.55581500  | -0.60888200 |
| H                         | -2.37288600 | -0.24346300 | 1.98118300  | H                         | 0.40055800  | 2.70947300  | -2.05572800 |
| <b>13'</b>                |             |             |             | <b>13'</b>                |             |             |             |
| Charge=1 Multiplicity = 1 |             |             |             | Charge=1 Multiplicity = 3 |             |             |             |
| C                         | 1.42380500  | 0.46190000  | 2.54229500  | C                         | 3.14759900  | -1.06535800 | -1.60212800 |
| C                         | 2.16125600  | 1.19964000  | 3.46144700  | C                         | 4.32607400  | -1.79501400 | -1.73938200 |
| C                         | 2.45859200  | 2.52851700  | 3.16142400  | C                         | 4.48669600  | -2.95346900 | -0.98107800 |
| C                         | 2.00123800  | 3.06429000  | 1.96079100  | C                         | 3.46677100  | -3.35626000 | -0.11863900 |
| C                         | 1.25970800  | 2.26497000  | 1.08627400  | C                         | 2.31034100  | -2.58140600 | -0.03229700 |
| N                         | 0.97878400  | 0.96673200  | 1.37708000  | N                         | 2.17510400  | -1.45083600 | -0.76370900 |
| H                         | 3.03724100  | 3.13819700  | 3.84823800  | H                         | 5.39366700  | -3.54461100 | -1.06131300 |
| H                         | 1.16169000  | -0.57217300 | 2.74200900  | H                         | 2.94284700  | -0.15749800 | -2.15854400 |
| H                         | 2.48911300  | 0.73999200  | 4.38766400  | H                         | 5.09406200  | -1.45689100 | -2.42615600 |
| H                         | 2.23475000  | 4.09059400  | 1.70253300  | H                         | 3.57365300  | -4.26304100 | 0.46494200  |
| H                         | 0.08818100  | 5.51549000  | -2.08007500 | H                         | -0.13905500 | -4.99909100 | 3.15179900  |
| C                         | 0.14147500  | 4.46947000  | -1.79477600 | C                         | -0.08028400 | -4.17170900 | 2.45142800  |
| C                         | -0.32217600 | 3.47153200  | -2.65123600 | C                         | -1.15875400 | -3.30686100 | 2.27882700  |
| C                         | 0.66915200  | 4.10599500  | -0.55857800 | C                         | 1.08305700  | -3.96472200 | 1.71130300  |
| C                         | -0.23985400 | 2.14786800  | -2.23081600 | C                         | -1.03708300 | -2.25625600 | 1.37285700  |
| H                         | -0.73970200 | 3.70845600  | -3.62396000 | H                         | -2.08200200 | -3.43585500 | 2.83292400  |
| C                         | 0.72509000  | 2.75385500  | -0.20823000 | C                         | 1.14009500  | -2.89575400 | 0.81787500  |
| H                         | 1.01203500  | 4.87003900  | 0.12941800  | H                         | 1.93262000  | -4.62560200 | 1.83587800  |
| N                         | 0.27249500  | 1.78577800  | -1.04347700 | N                         | 0.08372000  | -2.05607600 | 0.66005700  |
| H                         | -0.59060100 | 1.33743800  | -2.86191600 | H                         | -1.84227600 | -1.54995200 | 1.18294300  |
| Cu                        | 0.19651000  | -0.00188400 | -0.14730100 | Cu                        | 0.43944900  | -0.51681900 | -0.53956600 |
| O                         | 0.80754800  | -1.74856600 | -0.76627800 | O                         | 0.84430700  | 0.78088600  | -1.79330300 |
| C                         | 1.82117700  | -2.34627300 | -1.14054100 | C                         | 0.66679600  | 2.08503300  | -1.49579700 |
| C                         | 3.17436600  | -1.73814700 | -1.29005300 | C                         | 1.29596400  | 2.67248000  | -0.25669000 |
| H                         | 3.55809700  | -1.99086100 | -2.28785100 | H                         | 0.84024900  | 3.64736500  | -0.04345300 |
| H                         | 3.09936800  | -0.64806500 | -1.21079200 | H                         | 1.08700100  | 2.03127100  | 0.61418300  |
| C                         | 4.17008800  | -2.30192500 | -0.23027700 | C                         | 2.83707800  | 2.86608100  | -0.37513700 |
| H                         | 3.78634900  | -2.05077600 | 0.76887900  | H                         | 3.28646900  | 1.88536400  | -0.59172500 |
| H                         | 4.19644400  | -3.39640100 | -0.29720100 | H                         | 3.05073300  | 3.50871400  | -1.23809100 |
| C                         | 5.55511500  | -1.74331500 | -0.41458600 | C                         | 3.44436600  | 3.45261900  | 0.86857900  |
| H                         | 5.65753100  | -0.66332200 | -0.29355200 | H                         | 3.35721000  | 2.85029700  | 1.77635500  |
| C                         | 6.63270000  | -2.47425300 | -0.71318700 | C                         | 4.04852400  | 4.64264200  | 0.93957600  |
| H                         | 6.51718800  | -3.55369400 | -0.83075000 | H                         | 4.13056400  | 5.24190400  | 0.03038800  |
| C                         | 8.02161100  | -1.93765600 | -0.89706900 | C                         | 4.64459100  | 5.24337600  | 2.17928000  |
| H                         | 8.71666500  | -2.39317500 | -0.17989300 | H                         | 5.71677800  | 5.44038700  | 2.04782400  |
| H                         | 8.40532100  | -2.17488900 | -1.89787100 | H                         | 4.17717600  | 6.20861800  | 2.41522000  |

|                           |             |             |             |                           |             |             |             |
|---------------------------|-------------|-------------|-------------|---------------------------|-------------|-------------|-------------|
| H                         | 8.05872900  | -0.85144200 | -0.76534000 | H                         | 4.52372500  | 4.58604800  | 3.04684100  |
| H                         | -5.76317000 | -2.90097000 | 0.88458500  | H                         | -5.60802400 | 1.96386000  | -1.41197800 |
| C                         | -5.56884700 | -1.84087500 | 0.68841100  | C                         | -5.30163200 | 1.34152000  | -0.56459100 |
| C                         | -5.07483600 | -1.68368000 | -0.76599400 | C                         | -4.29568200 | 2.13188200  | 0.29732500  |
| C                         | -4.56617700 | -1.28086000 | 1.71827700  | C                         | -4.72409300 | 0.00321100  | -1.06654300 |
| H                         | -6.52908400 | -1.33111200 | 0.82021200  | H                         | -6.21481500 | 1.13893800  | 0.00488900  |
| H                         | -5.92788900 | -1.55599600 | -1.44227500 | H                         | -4.82752900 | 2.73356800  | 1.04317400  |
| C                         | -4.10763500 | -0.49593700 | -0.97536200 | C                         | -3.27013300 | 1.24567200  | 1.03901900  |
| H                         | -4.57513200 | -2.60244600 | -1.09589600 | H                         | -3.74835800 | 2.85024400  | -0.32297900 |
| C                         | -3.09639100 | -1.35434300 | 1.26567900  | C                         | -3.19600600 | 0.01319000  | -1.26953800 |
| H                         | -4.65635600 | -1.81443600 | 2.67120000  | H                         | -5.18553000 | -0.27953900 | -2.01896800 |
| H                         | -4.79484600 | -0.23224000 | 1.93752500  | H                         | -4.96853800 | -0.80302700 | -0.36566600 |
| N                         | -2.97327900 | -0.50787700 | 0.03664100  | N                         | -2.58288900 | 0.26710400  | 0.08371900  |
| C                         | -4.84277300 | 0.84784100  | -0.78316600 | C                         | -3.96844700 | 0.38773900  | 2.11523000  |
| C                         | -3.57352800 | -0.53884300 | -2.41540300 | C                         | -2.24960300 | 2.15142700  | 1.74510400  |
| C                         | -2.19086100 | -0.70670900 | 2.32721400  | C                         | -2.73954800 | -1.38698900 | -1.71544400 |
| C                         | -2.65552400 | -2.82842900 | 1.07553800  | C                         | -2.78883900 | 1.03019300  | -2.36093400 |
| O                         | -1.69303000 | -0.76759800 | -0.58187500 | O                         | -1.18182000 | 0.59843200  | -0.07691600 |
| H                         | -4.14861000 | 1.68001900  | -0.93659800 | H                         | -3.22995900 | -0.18612700 | 2.68577900  |
| H                         | -5.66327200 | 0.93936200  | -1.50444800 | H                         | -4.50653600 | 1.03328900  | 2.81825600  |
| H                         | -5.26605400 | 0.94975600  | 0.21907500  | H                         | -4.68858700 | -0.31477900 | 1.68882100  |
| H                         | -2.89198500 | 0.29149200  | -2.61779000 | H                         | -1.49212700 | 1.57533500  | 2.28308400  |
| H                         | -3.05841300 | -1.47657400 | -2.64925300 | H                         | -1.74259200 | 2.83220400  | 1.05462000  |
| H                         | -4.42223400 | -0.45549400 | -3.10170700 | H                         | -2.78636000 | 2.76700000  | 2.47404200  |
| H                         | -1.18910300 | -0.56370700 | 1.91204100  | H                         | -1.64582500 | -1.45340300 | -1.73645500 |
| H                         | -2.57506600 | 0.27696300  | 2.61423200  | H                         | -3.11663100 | -2.16020600 | -1.03849500 |
| H                         | -2.11897200 | -1.33224300 | 3.22398300  | H                         | -3.10022000 | -1.60710900 | -2.72520900 |
| H                         | -2.86881600 | -3.38746400 | 1.99220300  | H                         | -3.37004900 | 0.82738000  | -3.26649700 |
| H                         | -3.17728200 | -3.33713000 | 0.25989400  | H                         | -2.98066400 | 2.06877100  | -2.07974900 |
| H                         | -1.57577500 | -2.91279000 | 0.90415200  | H                         | -1.73268800 | 0.93400600  | -2.63014900 |
| H                         | -1.63659900 | -1.71279000 | -0.82618100 | H                         | 0.64236200  | 2.72709900  | -2.38199000 |
| H                         | 1.72866400  | -3.42389100 | -1.35769600 | H                         | -1.04330600 | 1.41732600  | -0.63508000 |
| <b>14</b>                 |             |             |             | <b>15</b>                 |             |             |             |
| Charge=1 Multiplicity = 1 |             |             |             | Charge=1 Multiplicity = 1 |             |             |             |
| Cu                        | -0.38470100 | 0.00590200  | 0.05451200  | O                         | -0.55617800 | -1.39667200 | 2.41369400  |
| N                         | 1.07597900  | 1.31794100  | -0.12246600 | O                         | -0.84546900 | -2.04661000 | 1.31080400  |
| N                         | 1.08769400  | -1.31290300 | 0.10844600  | Cu                        | -0.24688100 | -0.45285500 | 0.42515000  |
| C                         | 3.46323600  | 1.51860900  | 0.06212200  | N                         | 1.53671700  | -1.17046900 | -0.18937400 |
| C                         | 2.30474500  | 0.74706200  | -0.04047500 | C                         | 2.48161900  | -0.21638000 | -0.35735600 |
| C                         | 2.09613700  | 3.49241600  | -0.01480200 | C                         | 1.84726200  | -2.45767500 | -0.38969600 |
| H                         | 4.24925600  | 3.52267000  | 0.15638600  | C                         | 3.77643900  | -0.54804200 | -0.75932700 |
| H                         | -0.01736600 | 3.06558700  | -0.18218400 | C                         | 2.02718000  | 1.16817100  | -0.06772300 |
| H                         | 1.96743700  | 4.56932900  | -0.01148800 | C                         | 3.11821100  | -2.86240200 | -0.79127900 |



|                          |             |             |             |                           |             |             |             |
|--------------------------|-------------|-------------|-------------|---------------------------|-------------|-------------|-------------|
| H                        | 4.43562500  | 1.04817500  | 0.15000800  | H                         | 1.04980400  | -3.17183700 | -0.21165100 |
| H                        | 4.23751800  | -3.51121000 | -0.39475100 | H                         | 4.53232800  | 0.21672400  | -0.89271500 |
| C                        | 3.35301800  | -2.89874500 | -0.24995400 | C                         | 4.09519300  | -1.88747900 | -0.98125200 |
| C                        | 2.10220300  | -3.48523400 | -0.06960300 | N                         | 0.73781700  | 1.27898500  | 0.33771900  |
| C                        | 3.45599000  | -1.50860400 | -0.24716400 | C                         | 2.84315700  | 2.29668600  | -0.17074200 |
| C                        | 0.99937700  | -2.65276900 | 0.10229400  | H                         | 3.32961300  | -3.91480500 | -0.94516200 |
| H                        | 1.97621200  | -4.56245200 | -0.06149600 | H                         | 5.09799100  | -2.16256900 | -1.29286700 |
| C                        | 2.30590500  | -0.73970600 | -0.06224500 | C                         | 0.24068600  | 2.48374500  | 0.65432000  |
| H                        | 4.41870800  | -1.03621800 | -0.40435800 | C                         | 2.32446900  | 3.54731100  | 0.15951900  |
| C                        | 3.35796100  | 2.90846100  | 0.07422100  | H                         | 3.87162400  | 2.20795600  | -0.49954400 |
| H                        | 0.00539800  | -3.06269000 | 0.25038200  | C                         | 1.00066000  | 3.64724900  | 0.58414500  |
| C                        | 0.98560600  | 2.65785300  | -0.10801300 | H                         | -0.79742200 | 2.50215300  | 0.97049900  |
| N                        | -2.25289000 | -0.01423300 | 0.19728000  | H                         | 2.95045600  | 4.43128500  | 0.08768700  |
| C                        | -2.96381300 | -0.17459500 | 1.37547600  | H                         | 0.56199400  | 4.60072100  | 0.85672800  |
| C                        | -3.16553000 | 0.10417800  | -0.76485100 | N                         | -2.04003600 | 0.02214500  | -0.28433200 |
| C                        | -4.30314000 | -0.14993300 | 1.10269800  | C                         | -2.39755500 | 0.95517500  | -1.23931900 |
| H                        | -2.47045600 | -0.29619900 | 2.32774600  | C                         | -3.16821800 | -0.57930100 | 0.08403100  |
| N                        | -4.41864900 | 0.02583700  | -0.25990700 | C                         | -3.74951600 | 0.90330100  | -1.43646800 |
| H                        | -2.96295100 | 0.24654100  | -1.81595100 | H                         | -1.66603400 | 1.58550000  | -1.72211700 |
| H                        | -5.16828400 | -0.24017900 | 1.74161200  | N                         | -4.22521200 | -0.07681900 | -0.58736300 |
| C                        | -5.66405400 | 0.10985500  | -1.01866500 | H                         | -3.24140000 | -1.37177300 | 0.81392600  |
| H                        | -6.23563300 | -0.81507100 | -0.90688900 | H                         | -4.40333000 | 1.45843200  | -2.09176000 |
| H                        | -6.26256700 | 0.95369400  | -0.66604000 | C                         | -5.61899200 | -0.49492800 | -0.44323600 |
| H                        | -5.42735400 | 0.25730000  | -2.07352700 | H                         | -6.23082400 | 0.34871100  | -0.11438700 |
|                          |             |             |             | H                         | -5.99650500 | -0.87193200 | -1.39694300 |
|                          |             |             |             | H                         | -5.67414200 | -1.28897300 | 0.30273300  |
| <b>15</b>                |             |             |             | <b>16</b>                 |             |             |             |
| Charge=1 Multiplicity =3 |             |             |             | Charge=1 Multiplicity = 3 |             |             |             |
| O                        | -0.52716800 | -1.30873300 | 2.48115500  | Cu                        | -2.23682100 | 0.38550100  | -0.16246700 |
| O                        | -0.85063700 | -1.98973500 | 1.42232900  | N                         | -2.88913200 | -1.10288400 | 1.00400600  |
| Cu                       | -0.25563300 | -0.43411200 | 0.44838700  | N                         | -4.18084800 | 0.38491900  | -0.72841500 |
| N                        | 1.50647500  | -1.18603900 | -0.20006700 | C                         | -4.81837700 | -2.32371700 | 1.72344000  |
| C                        | 2.46614600  | -0.24620500 | -0.36868400 | C                         | -4.21784300 | -1.35197000 | 0.92044600  |
| C                        | 1.79946500  | -2.47667900 | -0.40742100 | C                         | -2.66233200 | -2.79202700 | 2.68422300  |
| C                        | 3.75543300  | -0.59701700 | -0.77355000 | H                         | -4.48565700 | -3.80069900 | 3.25460000  |
| C                        | 2.03777300  | 1.14747300  | -0.07933400 | H                         | -1.07260500 | -1.57092700 | 1.84371300  |
| C                        | 3.06280500  | -2.90019400 | -0.81272000 | H                         | -2.01803500 | -3.33593900 | 3.36638600  |
| H                        | 0.99275300  | -3.18156100 | -0.23364000 | H                         | -5.88248800 | -2.51781800 | 1.66056900  |
| H                        | 4.52301000  | 0.15639000  | -0.90431700 | H                         | -7.94389800 | 0.07418900  | -1.54882000 |
| C                        | 4.05451400  | -1.93980500 | -1.00028900 | C                         | -6.88635200 | 0.16458300  | -1.32126900 |
| N                        | 0.75896200  | 1.28246000  | 0.35081900  | C                         | -6.09081700 | 1.08987700  | -1.99482100 |
| C                        | 2.86923600  | 2.26206400  | -0.21080800 | C                         | -6.30865600 | -0.65038200 | -0.34861400 |
| H                        | 3.25719300  | -3.95516200 | -0.97156100 | C                         | -4.74171600 | 1.16903900  | -1.66069300 |
| H                        | 5.05281600  | -2.22875000 | -1.31378200 | H                         | -6.50091900 | 1.73868700  | -2.76091400 |

|   |             |             |             |    |             |             |             |
|---|-------------|-------------|-------------|----|-------------|-------------|-------------|
| C | 0.28743200  | 2.49894000  | 0.66193500  | C  | -4.94620000 | -0.52191100 | -0.07227900 |
| C | 2.37737400  | 3.52416600  | 0.11622500  | H  | -6.91743000 | -1.37441300 | 0.17975300  |
| H | 3.88867700  | 2.15447300  | -0.56129400 | C  | -4.03149600 | -3.04718600 | 2.61863600  |
| C | 1.06365500  | 3.64966700  | 0.56476400  | H  | -4.07989500 | 1.87958100  | -2.14522300 |
| H | -0.74425700 | 2.53788000  | 0.99707500  | C  | -2.13031400 | -1.81027500 | 1.85265800  |
| H | 3.01565800  | 4.39720100  | 0.02219900  | O  | -0.58015900 | -0.38231700 | -0.49548900 |
| H | 0.64512000  | 4.61290300  | 0.83477000  | O  | 0.58038400  | 0.38508400  | -0.49220600 |
| N | -2.04444900 | 0.01647500  | -0.28370400 | Cu | 2.23643600  | -0.38486600 | -0.16153900 |
| C | -2.38560800 | 0.94092200  | -1.25277100 | N  | 2.89115700  | 1.10283300  | 1.00480500  |
| C | -3.18092000 | -0.57219000 | 0.07859000  | C  | 4.21991000  | 1.35113000  | 0.91958600  |
| C | -3.73577500 | 0.89685800  | -1.46422100 | C  | 2.13381500  | 1.81082300  | 1.85428000  |
| H | -1.64440800 | 1.56146200  | -1.73350200 | C  | 4.82200000  | 2.32267400  | 1.72166600  |
| N | -4.22779700 | -0.07015400 | -0.60972600 | C  | 4.94659700  | 0.52046900  | -0.07385500 |
| H | -3.27040400 | -1.35408300 | 0.81818400  | C  | 2.66741900  | 2.79241300  | 2.68501600  |
| H | -4.37856600 | 1.44967000  | -2.13224900 | H  | 1.07595400  | 1.57210600  | 1.84665700  |
| C | -5.62605500 | -0.47580900 | -0.47537200 | H  | 5.88613900  | 2.51618100  | 1.65743600  |
| H | -6.23431800 | 0.37515000  | -0.15889900 | C  | 4.03664700  | 3.04676300  | 2.61769800  |
| H | -5.99785100 | -0.85734700 | -1.42953800 | N  | 4.17987800  | -0.38577600 | -0.72920400 |
| H | -5.69481000 | -1.26356100 | 0.27617200  | C  | 6.30889000  | 0.64781700  | -0.35153400 |
|   |             |             |             | H  | 2.02427400  | 3.33682100  | 3.36787100  |
|   |             |             |             | H  | 4.49202700  | 3.80013400  | 3.25296000  |
|   |             |             |             | C  | 4.73922300  | -1.17042700 | -1.66195500 |
|   |             |             |             | C  | 6.88498600  | -0.16767400 | -1.32469200 |
|   |             |             |             | H  | 6.91876700  | 1.37136600  | 0.17621600  |
|   |             |             |             | C  | 6.08805600  | -1.09238400 | -1.99739700 |
|   |             |             |             | H  | 4.07637100  | -1.88046500 | -2.14581400 |
|   |             |             |             | H  | 7.94238500  | -0.07814700 | -1.55327100 |
|   |             |             |             | H  | 6.49689500  | -1.74158700 | -2.76383000 |
|   |             |             |             | N  | 1.89699600  | -2.33287400 | -0.20129100 |
|   |             |             |             | C  | 2.74484600  | -3.33734600 | 0.23316500  |
|   |             |             |             | C  | 0.87428900  | -2.94293800 | -0.79511200 |
|   |             |             |             | C  | 2.21475800  | -4.55117500 | -0.10349900 |
|   |             |             |             | H  | 3.66356600  | -3.12217400 | 0.75789800  |
|   |             |             |             | N  | 1.02716700  | -4.28411500 | -0.75818800 |
|   |             |             |             | H  | 0.02722900  | -2.43091000 | -1.22667000 |
|   |             |             |             | H  | 2.56335700  | -5.55943200 | 0.06190700  |
|   |             |             |             | C  | 0.11624400  | -5.27687700 | -1.32630100 |
|   |             |             |             | H  | 0.62754100  | -5.85683500 | -2.09865600 |
|   |             |             |             | H  | -0.24030500 | -5.95064500 | -0.54315800 |
|   |             |             |             | H  | -0.73489900 | -4.76089100 | -1.77300700 |
|   |             |             |             | N  | -1.89881400 | 2.33380600  | -0.20234600 |
|   |             |             |             | C  | -2.74756100 | 3.33789400  | 0.23123900  |
|   |             |             |             | C  | -0.87565200 | 2.94433900  | -0.79489600 |
|   |             |             |             | C  | -2.21755900 | 4.55196800  | -0.10466000 |

|   |             |            |             |
|---|-------------|------------|-------------|
| H | -3.66676700 | 3.12230400 | 0.75494700  |
| N | -1.02909100 | 4.28544600 | -0.75797700 |
| H | -0.02782600 | 2.43273900 | -1.22545600 |
| H | -2.56674300 | 5.56007000 | 0.06045400  |
| C | -0.11803000 | 5.27862300 | -1.32514400 |
| H | -0.62818400 | 5.85712100 | -2.09935600 |
| H | 0.23588600  | 5.95367300 | -0.54192100 |
| H | 0.73477200  | 4.76312400 | -1.76924000 |

|           |                                 |             |             |           |                                  |             |             |
|-----------|---------------------------------|-------------|-------------|-----------|----------------------------------|-------------|-------------|
| <b>17</b> | <b>Charge=2 Multiplicity =1</b> |             |             | <b>17</b> | <b>Charge=2 Multiplicity = 3</b> |             |             |
| Cu        | -2.22463700                     | -0.85574200 | 0.23776700  | Cu        | -2.20414100                      | -0.88961800 | 0.23694900  |
| N         | -2.33176300                     | -1.93629000 | -1.43619400 | N         | -2.24673900                      | -1.95175800 | -1.44391900 |
| N         | -4.23972000                     | -0.94467000 | 0.04269000  | N         | -4.21044200                      | -1.02511500 | 0.00418800  |
| C         | -3.78383800                     | -2.95452700 | -3.04030600 | C         | -3.63863000                      | -2.99174400 | -3.08690200 |
| C         | -3.58114200                     | -2.20782400 | -1.87881000 | C         | -3.47979300                      | -2.25262100 | -1.91387600 |
| C         | -1.39349000                     | -3.12452200 | -3.28171400 | C         | -1.24044500                      | -3.09014100 | -3.28548500 |
| H         | -2.81381300                     | -4.00347700 | -4.65095900 | H         | -2.60938800                      | -3.99407800 | -4.69047000 |
| H         | -0.30372900                     | -2.09631700 | -1.69304400 | H         | -0.20990600                      | -2.04894200 | -1.66861000 |
| H         | -0.51033100                     | -3.46862000 | -3.80881400 | H         | -0.33781100                      | -3.40093000 | -3.80005800 |
| H         | -4.78370900                     | -3.17303700 | -3.39625400 | H         | -4.62506300                      | -3.23446400 | -3.46398100 |
| H         | -8.02141400                     | -1.30076300 | -0.66158000 | H         | -7.96637300                      | -1.48462800 | -0.77342200 |
| C         | -6.95958100                     | -1.19771900 | -0.46083700 | C         | -6.91185900                      | -1.35264300 | -0.55211100 |
| C         | -6.51182300                     | -0.47079800 | 0.64056100  | C         | -6.50582800                      | -0.62211600 | 0.56295500  |
| C         | -6.02692400                     | -1.79370300 | -1.30939300 | C         | -5.94682400                      | -1.91465800 | -1.38767000 |
| C         | -5.13984500                     | -0.37476000 | 0.85748700  | C         | -5.14138900                      | -0.48817700 | 0.80648600  |
| H         | -7.20483800                     | 0.01080400  | 1.32157000  | H         | -7.22505000                      | -0.16613000 | 1.23435400  |
| C         | -4.66644000                     | -1.64745000 | -1.03598500 | C         | -4.59661900                      | -1.73129700 | -1.08751700 |
| H         | -6.36248900                     | -2.36041100 | -2.16982000 | H         | -6.25000400                      | -2.48401000 | -2.25834600 |
| C         | -2.67443600                     | -3.41914900 | -3.74665400 | C         | -2.50354000                      | -3.41646100 | -3.77736200 |
| H         | -4.73666000                     | 0.16861400  | 1.70539600  | H         | -4.76950600                      | 0.05973700  | 1.66565400  |
| C         | -1.26339400                     | -2.37022700 | -2.11799700 | C         | -1.15415100                      | -2.34666000 | -2.11097500 |
| O         | -0.52532600                     | -0.14880600 | -0.12852700 | O         | -0.52167300                      | -0.11622100 | -0.07460700 |
| O         | 0.47391400                      | -1.05636600 | 0.35000800  | O         | 0.49261200                       | -0.97678300 | 0.44573000  |
| Cu        | 2.19032100                      | -0.88701900 | -0.29589700 | Cu        | 2.18861400                       | -0.87709700 | -0.26935800 |
| N         | 2.75167900                      | -2.58469000 | 0.64799400  | N         | 2.75681400                       | -2.56509900 | 0.68854300  |
| C         | 4.06359700                      | -2.64768100 | 0.97434500  | C         | 4.07176600                       | -2.62075300 | 1.00527600  |
| C         | 1.92991400                      | -3.58410300 | 0.99613200  | C         | 1.94001600                       | -3.55914800 | 1.06343400  |
| C         | 4.58420400                      | -3.75097100 | 1.65388700  | C         | 4.59956600                       | -3.71090300 | 1.70038300  |
| C         | 4.86251400                      | -1.46903500 | 0.55826400  | C         | 4.86658900                       | -1.44777700 | 0.56510200  |
| C         | 2.37988000                      | -4.71522400 | 1.67142100  | C         | 2.39701500                       | -4.67701000 | 1.75576900  |
| H         | 0.88971700                      | -3.44254900 | 0.72430600  | H         | 0.89676500                       | -3.42578300 | 0.79993300  |

|   |             |             |             |   |             |             |             |
|---|-------------|-------------|-------------|---|-------------|-------------|-------------|
| H | 5.63447300  | -3.79894100 | 1.91584500  | H | 5.65191600  | -3.75237100 | 1.95495300  |
| C | 3.73196800  | -4.79807800 | 2.00108500  | C | 3.75209100  | -4.75251900 | 2.07450400  |
| N | 4.15352600  | -0.48781000 | -0.05265000 | N | 4.15141200  | -0.47220300 | -0.04756000 |
| C | 6.23586900  | -1.33979800 | 0.77336200  | C | 6.24250700  | -1.31701700 | 0.76286400  |
| H | 1.68561500  | -5.50711100 | 1.93036700  | H | 1.70581800  | -5.46432100 | 2.03602200  |
| H | 4.12187200  | -5.66428200 | 2.52658100  | H | 4.14778600  | -5.60826500 | 2.61263300  |
| C | 4.78297400  | 0.62545800  | -0.45696500 | C | 4.77602200  | 0.63772900  | -0.46811300 |
| C | 6.88457600  | -0.17827600 | 0.35718400  | C | 6.88654100  | -0.15942300 | 0.32899200  |
| H | 6.79859900  | -2.13000300 | 1.25583200  | H | 6.81085400  | -2.10295500 | 1.24569600  |
| C | 6.14704500  | 0.82618100  | -0.26675900 | C | 6.14204300  | 0.84008100  | -0.29478200 |
| H | 4.16364300  | 1.37096800  | -0.94309600 | H | 4.15100500  | 1.37948700  | -0.95306100 |
| H | 7.95173100  | -0.06300400 | 0.51925400  | H | 7.95550400  | -0.04303700 | 0.47778400  |
| H | 6.61299300  | 1.74585300  | -0.60297300 | H | 6.60416600  | 1.75712300  | -0.64325300 |
| N | 1.96328900  | -0.01319600 | -2.05089000 | N | 1.94033100  | -0.04463900 | -2.04277500 |
| C | 2.62170900  | -0.38976400 | -3.20932400 | C | 2.60324000  | -0.41586100 | -3.20039300 |
| C | 1.23314000  | 1.05492600  | -2.36499700 | C | 1.20281300  | 1.01835900  | -2.35873600 |
| C | 2.27252800  | 0.46041500  | -4.22038200 | C | 2.24923800  | 0.43169600  | -4.21220600 |
| H | 3.29370500  | -1.23485700 | -3.23682700 | H | 3.28232600  | -1.25530700 | -3.22641400 |
| N | 1.39443300  | 1.37287300  | -3.66849100 | N | 1.36337500  | 1.33759800  | -3.66186400 |
| H | 0.61733400  | 1.62676100  | -1.68237600 | H | 0.57937900  | 1.58269200  | -1.67767800 |
| H | 2.56028600  | 0.49940900  | -5.26011700 | H | 2.53877700  | 0.47307100  | -5.25137200 |
| C | 0.77248000  | 2.49660000  | -4.36845800 | C | 0.73387800  | 2.45739000  | -4.36162100 |
| H | 1.54198800  | 3.17782800  | -4.74037000 | H | 1.49872100  | 3.14567500  | -4.73011500 |
| H | 0.17609000  | 2.13033100  | -5.20789600 | H | 0.14290300  | 2.08769700  | -5.20336300 |
| H | 0.12513900  | 3.02994500  | -3.67194500 | H | 0.08040900  | 2.98414100  | -3.66566600 |
| N | -2.14569000 | -0.78402200 | 2.20832800  | N | -2.16402600 | -0.81182800 | 2.21150400  |
| C | -2.76062200 | -1.66441200 | 3.08248600  | C | -2.76303400 | -1.70498900 | 3.08357200  |
| C | -1.43250100 | 0.05264500  | 2.95930000  | C | -1.49662600 | 0.05816700  | 2.96674500  |
| C | -2.40603800 | -1.34479300 | 4.36282500  | C | -2.44465200 | -1.35980000 | 4.36687700  |
| H | -3.40424200 | -2.45964900 | 2.73654300  | H | -3.37107300 | -2.52640400 | 2.73428800  |
| N | -1.56606700 | -0.25194000 | 4.26683300  | N | -1.64375400 | -0.23771000 | 4.27474900  |
| H | -0.84113900 | 0.88286900  | 2.59357200  | H | -0.92663300 | 0.90467700  | 2.60498700  |
| H | -2.66711100 | -1.78559500 | 5.31298800  | H | -2.70752000 | -1.80009000 | 5.31678900  |
| C | -0.94125200 | 0.45752400  | 5.38287100  | C | -1.06558600 | 0.50539700  | 5.39415000  |
| H | -1.70915400 | 0.85137300  | 6.05323000  | H | -1.85954700 | 0.88141900  | 6.04407600  |
| H | -0.28611900 | -0.21917700 | 5.93717000  | H | -0.39984000 | -0.14263200 | 5.96960600  |
| H | -0.35167200 | 1.28535800  | 4.98672500  | H | -0.49549100 | 1.34739400  | 4.99936300  |
| H | 1.70360500  | 6.19411900  | 0.06038700  | H | 1.66946000  | 6.22129800  | 0.00440900  |
| C | 0.84628100  | 5.54103500  | -0.13678600 | C | 0.80710000  | 5.57068800  | -0.17854100 |
| C | -0.46749600 | 6.25917000  | 0.23522500  | C | -0.50098200 | 6.30564800  | 0.18039900  |
| C | 1.06374800  | 4.21465400  | 0.61430400  | C | 1.01609000  | 4.25806200  | 0.59924200  |
| H | 0.87181900  | 5.32897800  | -1.21307500 | H | 0.82934900  | 5.33695600  | -1.25046100 |
| H | -0.80607300 | 6.84943800  | -0.62313700 | H | -0.83697700 | 6.87966900  | -0.68992900 |
| C | -1.57085900 | 5.27713900  | 0.68093900  | C | -1.61064800 | 5.34137900  | 0.64832700  |

|                          |             |             |             |                           |             |             |             |
|--------------------------|-------------|-------------|-------------|---------------------------|-------------|-------------|-------------|
| H                        | -0.28816900 | 6.97925300  | 1.04042600  | H                         | -0.31548500 | 7.04163400  | 0.96966400  |
| N                        | -0.03862700 | 3.27995800  | 0.20899700  | N                         | -0.09520000 | 3.32456200  | 0.21739900  |
| C                        | -1.43741600 | 3.86784800  | 0.06065500  | C                         | -1.48898500 | 3.91853200  | 0.05710400  |
| H                        | -2.55782600 | 5.67822300  | 0.42191000  | H                         | -2.59513800 | 5.74468400  | 0.38335300  |
| H                        | -1.57007000 | 5.17571500  | 1.77101200  | H                         | -1.60801100 | 5.26187500  | 1.74022400  |
| O                        | -0.00758400 | 2.18593500  | 1.15589100  | O                         | -0.07270000 | 2.25024400  | 1.18609400  |
| C                        | -2.49140400 | 2.95263700  | 0.69930800  | C                         | -2.54955900 | 3.02477100  | 0.71533000  |
| H                        | -2.44798500 | 1.93995000  | 0.28089800  | H                         | -2.51733100 | 2.00443600  | 0.31492200  |
| H                        | -2.36857600 | 2.88231000  | 1.78237700  | H                         | -2.42384500 | 2.97279000  | 1.79909500  |
| H                        | -3.48604300 | 3.36122900  | 0.48971600  | H                         | -3.54091100 | 3.43928500  | 0.50174500  |
| C                        | -1.72758800 | 3.93190600  | -1.45564900 | C                         | -1.77885800 | 3.95267500  | -1.46029800 |
| H                        | -2.72889900 | 4.33732900  | -1.64242100 | H                         | -2.77631200 | 4.36333100  | -1.65616800 |
| H                        | -1.01108100 | 4.56742400  | -1.98400300 | H                         | -1.05584300 | 4.56905800  | -2.00222800 |
| H                        | -1.68228700 | 2.92666000  | -1.89265200 | H                         | -1.74253900 | 2.93754300  | -1.87488400 |
| C                        | 1.17114800  | 4.45268800  | 2.13897600  | C                         | 1.13029700  | 4.52718700  | 2.11813000  |
| H                        | 1.35564000  | 3.51167200  | 2.66181800  | H                         | 1.30181300  | 3.59508100  | 2.66085400  |
| H                        | 2.01186700  | 5.12549800  | 2.34143600  | H                         | 1.98066700  | 5.19235800  | 2.30505600  |
| H                        | 0.27683200  | 4.90883900  | 2.56763400  | H                         | 0.24310400  | 5.00518600  | 2.53778300  |
| C                        | 2.38567600  | 3.58096200  | 0.14372700  | C                         | 2.33055500  | 3.60263100  | 0.13692400  |
| H                        | 2.52963400  | 2.60559900  | 0.62025800  | H                         | 2.46811500  | 2.63602700  | 0.63317600  |
| H                        | 2.38580800  | 3.44791700  | -0.94451100 | H                         | 2.32377200  | 3.44646400  | -0.94829100 |
| H                        | 3.23496800  | 4.21989500  | 0.41056400  | H                         | 3.18677300  | 4.23944300  | 0.38619000  |
| H                        | -0.11916800 | 1.37627800  | 0.59854600  | H                         | -0.15795600 | 1.43221900  | 0.63960500  |
| <b>TS17-18</b>           |             |             |             | <b>TS17-18</b>            |             |             |             |
| Charge=2 Multiplicity =1 |             |             |             | Charge=2 Multiplicity = 3 |             |             |             |
| Cu                       | -2.10345500 | -0.80590100 | 0.45829300  | Cu                        | -2.20793800 | -0.79571800 | 0.34498600  |
| N                        | -1.97785700 | -2.51416000 | -0.65863300 | N                         | -2.30903900 | -2.06890200 | -1.18605100 |
| N                        | -4.02391200 | -0.93952700 | -0.12160100 | N                         | -4.20083500 | -0.65898500 | -0.01692300 |
| C                        | -3.22541500 | -3.94516500 | -2.12933900 | C                         | -3.75865400 | -2.98896000 | -2.86047800 |
| C                        | -3.15448600 | -2.88195800 | -1.22209500 | C                         | -3.55045300 | -2.22533200 | -1.70779400 |
| C                        | -0.85593700 | -4.25412600 | -1.87205500 | C                         | -1.39555500 | -3.43130300 | -2.93281700 |
| H                        | -2.10580600 | -5.47761700 | -3.14530700 | H                         | -2.81741600 | -4.20622500 | -4.36605900 |
| H                        | 0.04836500  | -2.81351000 | -0.52334000 | H                         | -0.29861100 | -2.45978700 | -1.32495200 |
| H                        | 0.06980500  | -4.77349700 | -2.09622000 | H                         | -0.52438500 | -3.89728600 | -3.38099200 |
| H                        | -4.16775500 | -4.21926600 | -2.58927200 | H                         | -4.75133900 | -3.09597800 | -3.28209600 |
| H                        | -7.71133900 | -1.83075500 | -0.90860200 | H                         | -7.99054400 | -1.20669000 | -0.60372700 |
| C                        | -6.67912000 | -1.57587800 | -0.69006000 | C                         | -6.92935800 | -1.04861300 | -0.43899500 |
| C                        | -6.36492600 | -0.41316200 | 0.01568700  | C                         | -6.48410900 | -0.15101700 | 0.53198200  |
| C                        | -5.64717600 | -2.41318100 | -1.10461300 | C                         | -5.99076500 | -1.75002200 | -1.19203100 |
| C                        | -5.02813100 | -0.14201200 | 0.28373900  | C                         | -5.11364500 | 0.00329700  | 0.71272800  |
| H                        | -7.13672100 | 0.26924100  | 0.35504800  | H                         | -7.18051400 | 0.41660200  | 1.13972700  |
| C                        | -4.32336300 | -2.06946100 | -0.81342500 | C                         | -4.62919000 | -1.53336600 | -0.96358600 |
| H                        | -5.87529600 | -3.33078000 | -1.63426900 | H                         | -6.31992500 | -2.46811000 | -1.93410300 |

|    |             |             |             |    |             |             |             |
|----|-------------|-------------|-------------|----|-------------|-------------|-------------|
| C  | -2.06585800 | -4.64480600 | -2.45004000 | C  | -2.67065200 | -3.60408000 | -3.47471900 |
| H  | -4.73404300 | 0.74164000  | 0.84119000  | H  | -4.71778900 | 0.68081100  | 1.46268400  |
| C  | -0.85999600 | -3.17899000 | -0.99048900 | C  | -1.26004300 | -2.64726600 | -1.79209000 |
| O  | -0.46189500 | 0.10146400  | -0.17081500 | O  | -0.49581500 | 0.06235800  | -0.10086500 |
| O  | 0.62808900  | -0.50933100 | 0.56064700  | O  | 0.54510000  | -0.80344800 | 0.39348000  |
| Cu | 2.30127100  | -0.62688700 | -0.21503000 | Cu | 2.24814900  | -0.76001300 | -0.32526800 |
| N  | 2.96312200  | -1.75604100 | 1.32450900  | N  | 2.81955600  | -2.27042600 | 0.89663300  |
| C  | 4.29775500  | -1.69711100 | 1.54294200  | C  | 4.13767800  | -2.28457400 | 1.20237300  |
| C  | 2.19370700  | -2.52822600 | 2.10429500  | C  | 2.00462600  | -3.19550300 | 1.42174900  |
| C  | 4.89587200  | -2.45144900 | 2.55408700  | C  | 4.67339100  | -3.26677700 | 2.03806000  |
| C  | 5.03378900  | -0.77717900 | 0.64087700  | C  | 4.92779500  | -1.18535900 | 0.59471000  |
| C  | 2.72225500  | -3.30726200 | 3.13046100  | C  | 2.46948100  | -4.20556700 | 2.25992800  |
| H  | 1.13125200  | -2.49259400 | 1.88882000  | H  | 0.95687600  | -3.09450800 | 1.16034500  |
| H  | 5.96509100  | -2.40768900 | 2.72385200  | H  | 5.72916900  | -3.27706000 | 2.28130100  |
| C  | 4.09784200  | -3.26994700 | 3.35255700  | C  | 3.82870000  | -4.24168900 | 2.56687800  |
| N  | 4.26584000  | -0.14857700 | -0.28331800 | N  | 4.21176900  | -0.31386600 | -0.15875000 |
| C  | 6.40625500  | -0.53367300 | 0.72354500  | C  | 6.30172000  | -1.01724000 | 0.78039500  |
| H  | 2.06818200  | -3.92539600 | 3.73567200  | H  | 1.77997700  | -4.94141100 | 2.65904500  |
| H  | 4.54833200  | -3.86629300 | 4.13990000  | H  | 4.22996400  | -5.01474000 | 3.21485800  |
| C  | 4.83426300  | 0.72616600  | -1.12734700 | C  | 4.83520100  | 0.72794300  | -0.73070100 |
| C  | 6.99185800  | 0.37607700  | -0.15527600 | C  | 6.94358700  | 0.06797600  | 0.18662000  |
| H  | 7.01595200  | -1.03992600 | 1.46229900  | H  | 6.87010600  | -1.71937500 | 1.37847300  |
| C  | 6.19340900  | 1.02357400  | -1.09677200 | C  | 6.19864700  | 0.96209100  | -0.58065700 |
| H  | 4.16958300  | 1.19293800  | -1.84665700 | H  | 4.21113500  | 1.38670400  | -1.32511700 |
| H  | 8.05744900  | 0.57607900  | -0.10133600 | H  | 8.01090300  | 0.21085500  | 0.32381300  |
| H  | 6.60949200  | 1.74107800  | -1.79542300 | H  | 6.65886500  | 1.82098700  | -1.05663200 |
| N  | 1.95264600  | -0.62829400 | -2.15687900 | N  | 1.98635600  | -0.29473700 | -2.22461500 |
| C  | 2.78681500  | -1.13867700 | -3.13771300 | C  | 2.87258800  | -0.51229900 | -3.26560700 |
| C  | 0.87357400  | -0.17102300 | -2.78699400 | C  | 0.90917900  | 0.26827300  | -2.76494500 |
| C  | 2.19200600  | -0.98210600 | -4.35787800 | C  | 2.31157300  | -0.07272900 | -4.43180600 |
| H  | 3.74187300  | -1.58364500 | -2.90263100 | H  | 3.83786400  | -0.96945500 | -3.10914900 |
| N  | 0.97909800  | -0.36434100 | -4.11840100 | N  | 1.06543600  | 0.42199700  | -4.09714400 |
| H  | 0.02589600  | 0.27123200  | -2.28402500 | H  | 0.02513100  | 0.53918200  | -2.20558600 |
| H  | 2.51230500  | -1.24944200 | -5.35356200 | H  | 2.67593800  | -0.06745400 | -5.44800700 |
| C  | -0.00870500 | 0.01334400  | -5.12844600 | C  | 0.09445200  | 1.00414000  | -5.02246100 |
| H  | 0.43631100  | 0.70635600  | -5.84668000 | H  | 0.54396500  | 1.84634000  | -5.55409200 |
| H  | -0.36624400 | -0.87537000 | -5.65451300 | H  | -0.23497700 | 0.25324000  | -5.74516000 |
| H  | -0.84954800 | 0.50146800  | -4.63375500 | H  | -0.76611200 | 1.35946400  | -4.45387400 |
| N  | -2.23336000 | -0.36776500 | 2.36599900  | N  | -2.11962000 | -0.76256600 | 2.32460300  |
| C  | -3.26187500 | -0.66481900 | 3.24205700  | C  | -2.87349400 | -1.50785000 | 3.21310700  |
| C  | -1.34125700 | 0.32263200  | 3.06950800  | C  | -1.31667700 | -0.00795100 | 3.06740000  |
| C  | -2.97408400 | -0.14554400 | 4.47298700  | C  | -2.51049900 | -1.19221200 | 4.49310900  |
| H  | -4.12503000 | -1.23540700 | 2.93459300  | H  | -3.61555800 | -2.21638000 | 2.87621800  |
| N  | -1.74837900 | 0.48027400  | 4.34822800  | N  | -1.52003700 | -0.23515600 | 4.38449500  |

|                          |             |             |             |                           |             |             |             |
|--------------------------|-------------|-------------|-------------|---------------------------|-------------|-------------|-------------|
| H                        | -0.41611200 | 0.71690400  | 2.68014900  | H                         | -0.60575800 | 0.71255000  | 2.68684700  |
| H                        | -3.51308300 | -0.16605900 | 5.40801600  | H                         | -2.85669500 | -1.55184400 | 5.45031400  |
| C                        | -1.04034500 | 1.20366600  | 5.40099200  | C                         | -0.83419700 | 0.42468600  | 5.49277000  |
| H                        | -1.63655400 | 2.05467500  | 5.74032700  | H                         | -1.55172300 | 0.97613200  | 6.10592300  |
| H                        | -0.84237800 | 0.53975100  | 6.24643900  | H                         | -0.32220800 | -0.31580900 | 6.11268000  |
| H                        | -0.09259100 | 1.56909400  | 5.00258600  | H                         | -0.09917700 | 1.12218200  | 5.08817100  |
| H                        | 1.81942600  | 5.52481000  | -0.76461500 | H                         | 1.60516000  | 6.09488700  | -0.48949200 |
| C                        | 0.86753000  | 5.01825000  | -0.95888100 | C                         | 0.75419500  | 5.40760400  | -0.54646800 |
| C                        | -0.26792500 | 6.05207100  | -1.10934200 | C                         | -0.55509100 | 6.15010700  | -0.20547600 |
| C                        | 0.64431700  | 3.97689200  | 0.15388800  | C                         | 1.05691700  | 4.19700100  | 0.35647500  |
| H                        | 1.00096800  | 4.47387400  | -1.90177000 | H                         | 0.72330500  | 5.05213000  | -1.58359100 |
| H                        | -0.31868600 | 6.36538300  | -2.15729800 | H                         | -0.95966400 | 6.58719200  | -1.12435900 |
| C                        | -1.63620200 | 5.51618200  | -0.64163800 | C                         | -1.60590100 | 5.24176500  | 0.46410200  |
| H                        | -0.03502900 | 6.95717000  | -0.53917800 | H                         | -0.35084800 | 6.99436000  | 0.46080400  |
| N                        | -0.64895900 | 3.29574700  | -0.11034600 | N                         | -0.10222600 | 3.27073500  | 0.27909000  |
| C                        | -1.81430600 | 3.98362200  | -0.75008800 | C                         | -1.51048300 | 3.74717300  | 0.07874500  |
| H                        | -2.44141700 | 5.98939800  | -1.21442100 | H                         | -2.61583100 | 5.59009900  | 0.21954800  |
| H                        | -1.80861300 | 5.79460100  | 0.40360700  | H                         | -1.51948800 | 5.30894100  | 1.55395700  |
| O                        | -0.94415700 | 2.28584400  | 0.74526300  | O                         | 0.08444100  | 2.13029900  | 0.98529100  |
| C                        | -3.11938800 | 3.58847500  | -0.04243700 | C                         | -2.47436200 | 2.94489300  | 0.96328500  |
| H                        | -3.34109900 | 2.52613500  | -0.16923400 | H                         | -2.50353800 | 1.88802200  | 0.68081900  |
| H                        | -3.07228500 | 3.80440700  | 1.02822600  | H                         | -2.19805200 | 3.01068600  | 2.01900400  |
| H                        | -3.94145800 | 4.16578700  | -0.47805300 | H                         | -3.48226600 | 3.35517800  | 0.84175700  |
| C                        | -1.88380100 | 3.53166500  | -2.22806600 | C                         | -1.89474700 | 3.53217400  | -1.40415700 |
| H                        | -2.76110300 | 3.97095500  | -2.71586300 | H                         | -2.93532400 | 3.83238100  | -1.57110200 |
| H                        | -0.99672000 | 3.83424100  | -2.79173000 | H                         | -1.26427800 | 4.11468800  | -2.08136100 |
| H                        | -1.97410500 | 2.44027900  | -2.28447700 | H                         | -1.79955500 | 2.47271100  | -1.67052400 |
| C                        | 0.64903700  | 4.61539300  | 1.56274100  | C                         | 1.33616100  | 4.61835900  | 1.81783400  |
| H                        | 0.38875500  | 3.86336600  | 2.31278200  | H                         | 1.45757300  | 3.73137000  | 2.44573600  |
| H                        | 1.64695600  | 5.00496400  | 1.79139500  | H                         | 2.26080400  | 5.20362700  | 1.86425100  |
| H                        | -0.05935800 | 5.44269300  | 1.64678300  | H                         | 0.53330700  | 5.23060600  | 2.23568700  |
| C                        | 1.76353100  | 2.92076500  | 0.08280600  | C                         | 2.29063600  | 3.45389200  | -0.19024700 |
| H                        | 1.62125300  | 2.14569800  | 0.84035200  | H                         | 2.55552500  | 2.61348100  | 0.45678700  |
| H                        | 1.77591000  | 2.44685800  | -0.90584400 | H                         | 2.09424100  | 3.07565400  | -1.20029700 |
| H                        | 2.73374400  | 3.40004500  | 0.25099000  | H                         | 3.14325100  | 4.13964300  | -0.23634500 |
| H                        | -0.62428800 | 1.28383100  | 0.30172600  | H                         | -0.20885900 | 1.17730900  | 0.40014000  |
| <b>18</b>                |             |             |             | <b>18</b>                 |             |             |             |
| Charge=2 Multiplicity =1 |             |             |             | Charge=2 Multiplicity = 3 |             |             |             |
| Cu                       | -2.22463700 | -0.85574200 | 0.23776700  | Cu                        | -2.42515400 | -0.34928200 | 0.66277200  |
| N                        | -2.33176300 | -1.93629000 | -1.43619400 | N                         | -2.78782500 | -2.23707500 | 0.12386300  |
| N                        | -4.23972000 | -0.94467000 | 0.04269000  | N                         | -4.25086800 | -0.04154800 | -0.11278500 |
| C                        | -3.78383800 | -2.95452700 | -3.04030600 | C                         | -4.40944400 | -3.62668400 | -0.98605700 |
| C                        | -3.58114200 | -2.20782400 | -1.87881000 | C                         | -4.02092000 | -2.40739200 | -0.41916300 |

|    |             |             |             |    |             |             |             |
|----|-------------|-------------|-------------|----|-------------|-------------|-------------|
| C  | -1.39349000 | -3.12452200 | -3.28171400 | C  | -2.24387600 | -4.51012700 | -0.44347200 |
| H  | -2.81381300 | -4.00347700 | -4.65095900 | H  | -3.80499900 | -5.64765000 | -1.41994400 |
| H  | -0.30372900 | -2.09631700 | -1.69304400 | H  | -0.94926700 | -3.06611600 | 0.52482300  |
| H  | -0.51033100 | -3.46862000 | -3.80881400 | H  | -1.51746600 | -5.31603300 | -0.42319200 |
| H  | -4.78370900 | -3.17303700 | -3.39625400 | H  | -5.39138200 | -3.73818200 | -1.43175500 |
| H  | -8.02141400 | -1.30076300 | -0.66158000 | H  | -8.10378400 | -0.12356400 | -0.61304200 |
| C  | -6.95958100 | -1.19771900 | -0.46083700 | C  | -7.02699400 | -0.09679900 | -0.47916000 |
| C  | -6.51182300 | -0.47079800 | 0.64056100  | C  | -6.36683000 | 1.10591300  | -0.22257400 |
| C  | -6.02692400 | -1.79370300 | -1.30939300 | C  | -6.27936600 | -1.26837400 | -0.54950500 |
| C  | -5.13984500 | -0.37476000 | 0.85748700  | C  | -4.98872000 | 1.08227800  | -0.04295600 |
| H  | -7.20483800 | 0.01080400  | 1.32157000  | H  | -6.90664200 | 2.04506200  | -0.16207600 |
| C  | -4.66644000 | -1.64745000 | -1.03598500 | C  | -4.89352900 | -1.21341900 | -0.36834300 |
| H  | -6.36248900 | -2.36041100 | -2.16982000 | H  | -6.77453500 | -2.21792900 | -0.71842700 |
| C  | -2.67443600 | -3.41914900 | -3.74665400 | C  | -3.51573000 | -4.69298300 | -0.99147200 |
| H  | -4.73666000 | 0.16861400  | 1.70539600  | H  | -4.43889400 | 1.99526900  | 0.16335600  |
| C  | -1.26339400 | -2.37022700 | -2.11799700 | C  | -1.92460600 | -3.26859200 | 0.09429100  |
| O  | -0.52532600 | -0.14880600 | -0.12852700 | O  | -0.52556100 | -0.13817900 | -0.23167000 |
| O  | 0.47391400  | -1.05636600 | 0.35000800  | O  | 0.44787000  | -0.80438100 | 0.62325200  |
| Cu | 2.19032100  | -0.88701900 | -0.29589700 | Cu | 2.09804500  | -1.21099800 | -0.11347400 |
| N  | 2.75167900  | -2.58469000 | 0.64799400  | N  | 2.76958700  | -1.82574700 | 1.68403200  |
| C  | 4.06359700  | -2.64768100 | 0.97434500  | C  | 4.11137500  | -1.74934500 | 1.84413800  |
| C  | 1.92991400  | -3.58410300 | 0.99613200  | C  | 2.00291700  | -2.29470700 | 2.67791600  |
| C  | 4.58420400  | -3.75097100 | 1.65388700  | C  | 4.72043900  | -2.17980000 | 3.02389300  |
| C  | 4.86251400  | -1.46903500 | 0.55826400  | C  | 4.84092700  | -1.17296200 | 0.68745600  |
| C  | 2.37988000  | -4.71522400 | 1.67142100  | C  | 2.54285000  | -2.74216500 | 3.88136700  |
| H  | 0.88971700  | -3.44254900 | 0.72430600  | H  | 0.93485900  | -2.28960200 | 2.48776600  |
| H  | 5.63447300  | -3.79894100 | 1.91584500  | H  | 5.79527900  | -2.12450400 | 3.14923700  |
| C  | 3.73196800  | -4.79807800 | 2.00108500  | C  | 3.92513400  | -2.68756600 | 4.05103400  |
| N  | 4.15352600  | -0.48781000 | -0.05265000 | N  | 4.06089500  | -0.83398100 | -0.36909700 |
| C  | 6.23586900  | -1.33979800 | 0.77336200  | C  | 6.22026800  | -0.95685800 | 0.66134000  |
| H  | 1.68561500  | -5.50711100 | 1.93036700  | H  | 1.89170700  | -3.12254000 | 4.66071200  |
| H  | 4.12187200  | -5.66428200 | 2.52658100  | H  | 4.38358500  | -3.03121200 | 4.97309200  |
| C  | 4.78297400  | 0.62545800  | -0.45696500 | C  | 4.62248000  | -0.27583200 | -1.45278100 |
| C  | 6.88457600  | -0.17827600 | 0.35718400  | C  | 6.79925800  | -0.37708600 | -0.46616500 |
| H  | 6.79859900  | -2.13000300 | 1.25583200  | H  | 6.84031100  | -1.23197000 | 1.50616700  |
| C  | 6.14704500  | 0.82618100  | -0.26675900 | C  | 5.98793100  | -0.02382300 | -1.54364000 |
| H  | 4.16364300  | 1.37096800  | -0.94309600 | H  | 3.94686800  | -0.03561600 | -2.26737600 |
| H  | 7.95173100  | -0.06300400 | 0.51925400  | H  | 7.87030400  | -0.20339900 | -0.49933300 |
| H  | 6.61299300  | 1.74585300  | -0.60297300 | H  | 6.39931800  | 0.43187000  | -2.43758700 |
| N  | 1.96328900  | -0.01319600 | -2.05089000 | N  | 1.65891300  | -1.83716300 | -1.93204100 |
| C  | 2.62170900  | -0.38976400 | -3.20932400 | C  | 2.47395700  | -2.60179900 | -2.75000800 |
| C  | 1.23314000  | 1.05492600  | -2.36499700 | C  | 0.48917000  | -1.74050000 | -2.56014600 |
| C  | 2.27252800  | 0.46041500  | -4.22038200 | C  | 1.77869700  | -2.95548300 | -3.87177100 |
| H  | 3.29370500  | -1.23485700 | -3.23682700 | H  | 3.48745400  | -2.85222900 | -2.47628400 |



|   |             |             |             |   |             |             |             |
|---|-------------|-------------|-------------|---|-------------|-------------|-------------|
| N | 1.39443300  | 1.37287300  | -3.66849100 | N | 0.52130100  | -2.39968700 | -3.73665200 |
| H | 0.61733400  | 1.62676100  | -1.68237600 | H | -0.36998000 | -1.21595600 | -2.16952600 |
| H | 2.56028600  | 0.49940900  | -5.26011700 | H | 2.05652200  | -3.54173500 | -4.73459800 |
| C | 0.77248000  | 2.49660000  | -4.36845800 | C | -0.57487400 | -2.50740000 | -4.69908700 |
| H | 1.54198800  | 3.17782800  | -4.74037000 | H | -0.28211700 | -2.06040200 | -5.65236200 |
| H | 0.17609000  | 2.13033100  | -5.20789600 | H | -0.83372500 | -3.55767800 | -4.85353000 |
| H | 0.12513900  | 3.02994500  | -3.67194500 | H | -1.44348800 | -1.97771500 | -4.30553200 |
| N | -2.14569000 | -0.78402200 | 2.20832800  | N | -2.20891800 | 0.60815000  | 2.34675500  |
| C | -2.76062200 | -1.66441200 | 3.08248600  | C | -3.11069000 | 0.61708500  | 3.39562500  |
| C | -1.43250100 | 0.05264500  | 2.95930000  | C | -1.22238700 | 1.42047300  | 2.71038800  |
| C | -2.40603800 | -1.34479300 | 4.36282500  | C | -2.65252100 | 1.43943300  | 4.38777700  |
| H | -3.40424200 | -2.45964900 | 2.73654300  | H | -4.01836800 | 0.03312500  | 3.36783200  |
| N | -1.56606700 | -0.25194000 | 4.26683300  | N | -1.44947900 | 1.94609200  | 3.93890600  |
| H | -0.84113900 | 0.88286900  | 2.59357200  | H | -0.35075200 | 1.65653200  | 2.11634200  |
| H | -2.66711100 | -1.78559500 | 5.31298800  | H | -3.06145700 | 1.70448800  | 5.35104800  |
| C | -0.94125200 | 0.45752400  | 5.38287100  | C | -0.58766200 | 2.87937200  | 4.65619600  |
| H | -1.70915400 | 0.85137300  | 6.05323000  | H | -1.12567800 | 3.80786900  | 4.86537700  |
| H | -0.28611900 | -0.21917700 | 5.93717000  | H | -0.25146300 | 2.43844100  | 5.59862000  |
| H | -0.35167200 | 1.28535800  | 4.98672500  | H | 0.28302300  | 3.10356200  | 4.03734000  |
| H | 1.70360500  | 6.19411900  | 0.06038700  | H | 2.64281600  | 5.84553900  | -1.76071700 |
| C | 0.84628100  | 5.54103500  | -0.13678600 | C | 1.87217900  | 5.07928000  | -1.89779700 |
| C | -0.46749600 | 6.25917000  | 0.23522500  | C | 0.60550200  | 5.70182900  | -2.52303700 |
| C | 1.06374800  | 4.21465400  | 0.61430400  | C | 1.65469000  | 4.37570700  | -0.54217700 |
| H | 0.87181900  | 5.32897800  | -1.21307500 | H | 2.30028200  | 4.34017200  | -2.58584900 |
| H | -0.80607300 | 6.84943800  | -0.62313700 | H | 0.69122500  | 5.64537500  | -3.61303200 |
| C | -1.57085900 | 5.27713900  | 0.68093900  | C | -0.70016000 | 5.02859400  | -2.05401700 |
| H | -0.28816900 | 6.97925300  | 1.04042600  | H | 0.54725400  | 6.76841300  | -2.28423000 |
| N | -0.03862700 | 3.27995800  | 0.20899700  | N | 0.55734800  | 3.36560700  | -0.72251600 |
| C | -1.43741600 | 3.86784800  | 0.06065500  | C | -0.57985600 | 3.53572600  | -1.68511200 |
| H | -2.55782600 | 5.67822300  | 0.42191000  | H | -1.46835800 | 5.11654300  | -2.82995800 |
| H | -1.57007000 | 5.17571500  | 1.77101200  | H | -1.09900200 | 5.55732600  | -1.18151300 |
| O | -0.00758400 | 2.18593500  | 1.15589100  | O | 0.62973700  | 2.27302100  | -0.03616200 |
| C | -2.49140400 | 2.95263700  | 0.69930800  | C | -1.88397500 | 3.09201100  | -0.99800300 |
| H | -2.44798500 | 1.93995000  | 0.28089800  | H | -1.90870900 | 2.02023700  | -0.78221900 |
| H | -2.36857600 | 2.88231000  | 1.78237700  | H | -2.03254800 | 3.63467900  | -0.05868500 |
| H | -3.48604300 | 3.36122900  | 0.48971600  | H | -2.72567700 | 3.31874400  | -1.66049100 |
| C | -1.72758800 | 3.93190600  | -1.45564900 | C | -0.30858200 | 2.65679600  | -2.92341400 |
| H | -2.72889900 | 4.33732900  | -1.64242100 | H | -1.16832900 | 2.69635100  | -3.60064100 |
| H | -1.01108100 | 4.56742400  | -1.98400300 | H | 0.57321500  | 2.99103600  | -3.47751500 |
| H | -1.68228700 | 2.92666000  | -1.89265200 | H | -0.15418200 | 1.61450000  | -2.62491200 |
| C | 1.17114800  | 4.45268800  | 2.13897600  | C | 1.26227400  | 5.36002200  | 0.58059300  |
| H | 1.35564000  | 3.51167200  | 2.66181800  | H | 1.05611600  | 4.81247400  | 1.50631700  |
| H | 2.01186700  | 5.12549800  | 2.34143600  | H | 2.09208900  | 6.04887800  | 0.77097100  |
| H | 0.27683200  | 4.90883900  | 2.56763400  | H | 0.38286100  | 5.95881100  | 0.33234200  |

|                           |             |             |             |                           |             |             |             |
|---------------------------|-------------|-------------|-------------|---------------------------|-------------|-------------|-------------|
| C                         | 2.38567600  | 3.58096200  | 0.14372700  | C                         | 2.93964300  | 3.63761900  | -0.13807900 |
| H                         | 2.52963400  | 2.60559900  | 0.62025800  | H                         | 2.83717300  | 3.15583000  | 0.83614700  |
| H                         | 2.38580800  | 3.44791700  | -0.94451100 | H                         | 3.20415100  | 2.87287000  | -0.87578200 |
| H                         | 3.23496800  | 4.21989500  | 0.41056400  | H                         | 3.75913700  | 4.36117800  | -0.08486900 |
| H                         | -0.11916800 | 1.37627800  | 0.59854600  | H                         | -0.17543000 | 0.79612400  | -0.24323800 |
| <b>19</b>                 |             |             |             | <b>20</b>                 |             |             |             |
| Charge=1 Multiplicity = 2 |             |             |             | Charge=1 Multiplicity = 2 |             |             |             |
| O                         | -1.84577300 | -2.27045900 | 1.85246900  | O                         | -1.89022700 | -3.16595900 | -1.42121400 |
| O                         | -0.55560100 | -2.07148500 |             | O                         | -0.66360500 | -2.53341700 | -1.01258700 |
|                           | 1.24239300  |             |             | Cu                        | -0.81257400 | -0.80809600 | -0.47646500 |
| Cu                        | -0.22172900 | -0.45717200 |             | N                         | -0.80100500 | 1.16199100  | -0.51260300 |
|                           | 0.43222500  |             |             | C                         | -1.93934600 | 1.73132200  | -0.04480800 |
| N                         | 1.56185200  | -1.15306300 | -           | C                         | 0.19746900  | 1.93644700  | -0.96408400 |
|                           | 0.17646900  |             |             | C                         | -2.09159200 | 3.11803700  | -0.02638500 |
| C                         | 2.52468600  | -0.21785700 | -           | C                         | -2.97072900 | 0.76576900  | 0.40739600  |
|                           | 0.33724500  |             |             | C                         | 0.10945400  | 3.32516200  | -0.97943100 |
| C                         | 1.82913400  | -2.44416800 | -           | H                         | 1.08068400  | 1.41338900  | -1.31465700 |
|                           | 0.41100500  |             |             | H                         | -3.00222700 | 3.57071800  | 0.34748100  |
| C                         | 3.80216600  | -0.57055600 | -           | C                         | -1.05581800 | 3.92203800  | -0.50057800 |
|                           | 0.77394900  |             |             | N                         | -2.62381200 | -0.53749400 | 0.26659900  |
| C                         | 2.10265900  | 1.16437400  |             | C                         | -4.21196100 | 1.12486800  | 0.93132300  |
|                           | 0.00268100  |             |             | H                         | 0.93533700  | 3.91674800  | -1.35854400 |
| C                         | 3.08303000  | -2.86776600 | -           | H                         | -1.16139300 | 5.00240400  | -0.49580000 |
|                           | 0.84711300  |             |             | C                         | -3.48745000 | -1.50243800 | 0.61018200  |
| H                         | 1.00954200  | -3.12956800 | -           | C                         | -5.10418300 | 0.12125600  | 1.30940800  |
|                           | 0.22095900  |             |             | H                         | -4.48767800 | 2.16681200  | 1.04306200  |
| H                         | 4.57336000  | 0.17881900  | -           | C                         | -4.74093900 | -1.21341000 | 1.14465000  |
|                           | 0.90830500  |             |             | H                         | -3.15604800 | -2.51533000 | 0.41196800  |
| C                         | 4.07991800  | -1.91263700 | -           | H                         | -6.07419300 | 0.38395000  | 1.71985400  |
|                           | 1.03521000  |             |             | H                         | -5.41230900 | -2.02069200 | 1.41543500  |
| N                         | 0.80671100  | 1.28961600  |             | H                         | -1.70566400 | -4.08963900 | -1.17138500 |
|                           | 0.38172900  |             |             | H                         | 1.61024700  | -0.02401400 | 1.46052600  |
| C                         | 2.95431800  | 2.27084900  | -           | C                         | 1.86715700  | -0.99439800 | 1.02624600  |
|                           | 0.02178200  |             |             | O                         | 1.21867700  | -0.99279600 | -0.28328100 |
| H                         | 3.26601200  | -3.92082700 | -           | C                         | 3.37422500  | -1.17056100 | 0.91022300  |
|                           | 1.03021000  |             |             | H                         | 1.41730300  | -1.78376500 | 1.63986500  |
| H                         | 5.06812100  | -2.20509800 | -           | H                         | 1.37579900  | -1.85701700 | -0.71060900 |
|                           | 1.37650200  |             |             | H                         | 3.77693400  | -1.24235300 | 1.92885400  |
| C                         | 0.33905200  | 2.49165500  |             | H                         | 3.58903100  | -2.13877000 | 0.43454300  |
|                           | 0.74987200  |             |             | C                         | 4.08763800  | -0.03547900 | 0.15135700  |
| C                         | 2.46360200  | 3.51803100  |             | H                         | 3.63969400  | 0.05392000  | -0.84946300 |
|                           | 0.36000900  |             |             | H                         | 3.90284100  | 0.91598300  | 0.66896900  |

|                          |             |             |             |                           |            |             |             |
|--------------------------|-------------|-------------|-------------|---------------------------|------------|-------------|-------------|
| H                        | 3.98899100  | 2.16571500  | -           | C                         | 5.57019200 | -0.26676600 | 0.02731700  |
| 0.32577400               |             |             |             | H                         | 5.87151200 | -1.14354300 | -0.54943000 |
| C                        | 1.13285500  | 3.63458600  |             | C                         | 6.51275600 | 0.50727900  | 0.57190100  |
| 0.75869200               |             |             |             | H                         | 6.20327700 | 1.38280300  | 1.14706000  |
| H                        | -0.70616900 | 2.52503600  |             | C                         | 7.99244900 | 0.28296800  | 0.45920300  |
| 1.04094700               |             |             |             | H                         | 8.48713200 | 1.14103200  | -0.01450300 |
| H                        | 3.11606700  | 4.38559400  |             | H                         | 8.45067600 | 0.16570800  | 1.44999500  |
| 0.34960700               |             |             |             | H                         | 8.22272100 | -0.61022800 | -0.13054300 |
| H                        | 0.71457700  | 4.58552600  |             |                           |            |             |             |
| 1.06970200               |             |             |             |                           |            |             |             |
| N                        | -1.98217100 | 0.16371500  | -           |                           |            |             |             |
| 0.20473500               |             |             |             |                           |            |             |             |
| C                        | -2.21336700 | 1.13480100  | -           |                           |            |             |             |
| 1.16459200               |             |             |             |                           |            |             |             |
| C                        | -3.16391300 | -0.39108000 |             |                           |            |             |             |
| 0.05384400               |             |             |             |                           |            |             |             |
| C                        | -3.54427100 | 1.15388100  | -           |                           |            |             |             |
| 1.47244800               |             |             |             |                           |            |             |             |
| H                        | -1.41587200 | 1.73801400  | -           |                           |            |             |             |
| 1.57103900               |             |             |             |                           |            |             |             |
| N                        | -4.13364000 | 0.17941200  | -           |                           |            |             |             |
| 0.68965400               |             |             |             |                           |            |             |             |
| H                        | -3.31202200 | -1.19979800 |             |                           |            |             |             |
| 0.75467100               |             |             |             |                           |            |             |             |
| H                        | -4.11450200 | 1.75489300  | -           |                           |            |             |             |
| 2.16424000               |             |             |             |                           |            |             |             |
| C                        | -5.55122800 | -0.17706800 | -0.67499700 |                           |            |             |             |
| H                        | -6.15208800 | 0.68480100  | -           |                           |            |             |             |
| 0.37382200               |             |             |             |                           |            |             |             |
| H                        | -5.86284300 | -0.51151400 | -1.66767600 |                           |            |             |             |
| H                        | -5.70295400 | -0.98750900 |             |                           |            |             |             |
| 0.03911400               |             |             |             |                           |            |             |             |
| H                        | -1.63019100 | -2.15055300 |             |                           |            |             |             |
| 2.79444700               |             |             |             |                           |            |             |             |
| <b>TS20-21</b>           |             |             |             | <b>21</b>                 |            |             |             |
| Charge=1 Multiplicity =2 |             |             |             | Charge=1 Multiplicity = 2 |            |             |             |
| C                        | 2.94996200  | -2.21228500 | -0.49721500 | C                         | 3.03674700 | -2.07834400 | -0.70024000 |
| C                        | 4.26181200  | -2.43521600 | -0.90803000 | C                         | 4.33981200 | -2.18168100 | -1.17823800 |
| C                        | 5.10087500  | -1.33616200 | -1.08064800 | C                         | 5.09465300 | -1.01700000 | -1.30521700 |
| C                        | 4.61232300  | -0.05201200 | -0.83451200 | C                         | 4.52962300 | 0.20849500  | -0.95155600 |
| C                        | 3.28980400  | 0.10113400  | -0.42358500 | C                         | 3.21829400 | 0.24122500  | -0.47999300 |
| N                        | 2.48132000  | -0.97739200 | -0.26850500 | N                         | 2.49086100 | -0.89978400 | -0.36502900 |
| H                        | 6.12896300  | -1.47221400 | -1.40139300 | H                         | 6.11452300 | -1.05771400 | -1.67471500 |

|                           |             |             |             |                          |             |             |             |
|---------------------------|-------------|-------------|-------------|--------------------------|-------------|-------------|-------------|
| H                         | 2.24665300  | -3.02274100 | -0.33957300 | H                        | 2.40168300  | -2.94932800 | -0.57754000 |
| H                         | 4.60928400  | -3.44681900 | -1.08555200 | H                        | 4.74544500  | -3.15209100 | -1.44159000 |
| H                         | 5.25801900  | 0.80905900  | -0.96088200 | H                        | 5.10761500  | 1.12038900  | -1.04399300 |
| H                         | 3.03475900  | 4.75764300  | 0.15364800  | H                        | 2.67717900  | 4.82838800  | 0.38725100  |
| C                         | 2.55740900  | 3.78347200  | 0.19248200  | C                        | 2.26631400  | 3.82364900  | 0.37833900  |
| C                         | 1.23117200  | 3.66156000  | 0.60376200  | C                        | 0.96218400  | 3.58889400  | 0.81033700  |
| C                         | 3.27661700  | 2.64153900  | -0.16451600 | C                        | 3.05001500  | 2.75580100  | -0.06298700 |
| C                         | 0.65954800  | 2.39200000  | 0.63505900  | C                        | 0.47631600  | 2.28364700  | 0.77943200  |
| H                         | 0.64699600  | 4.52680600  | 0.89658700  | H                        | 0.32966700  | 4.39474600  | 1.16565700  |
| C                         | 2.64523400  | 1.40039300  | -0.10700500 | C                        | 2.50278000  | 1.47388500  | -0.06549000 |
| H                         | 4.31090200  | 2.72541800  | -0.47691400 | H                        | 4.06770300  | 2.92860700  | -0.39297600 |
| N                         | 1.35108000  | 1.29973700  | 0.28343600  | N                        | 1.23102700  | 1.26440700  | 0.34974100  |
| H                         | -0.36290400 | 2.21776800  | 0.95355300  | H                        | -0.52372500 | 2.01794100  | 1.10554000  |
| Cu                        | 0.65733100  | -0.53178700 | 0.27678300  | Cu                       | 0.65563600  | -0.60733600 | 0.26474900  |
| O                         | 0.49748300  | -2.51395000 | 1.98024900  | O                        | 0.74001900  | -2.63662800 | 2.28256500  |
| O                         | -0.10842300 | -2.33763500 | 0.66148200  | O                        | 0.17644200  | -2.50621100 | 0.94826100  |
| H                         | 0.09799600  | -3.36019800 | 2.25479500  | H                        | 0.66022800  | -3.60019900 | 2.41802800  |
| H                         | -0.95916400 | -1.56951800 | 0.82809500  | H                        | -0.72816300 | -2.08030400 | 1.09721800  |
| C                         | -2.09896700 | 0.05418400  | -0.35939200 | C                        | -2.03100600 | -0.07018900 | -0.41658800 |
| H                         | -1.83683800 | 1.04433700  | -0.76035400 | H                        | -1.75250100 | 0.92669800  | -0.80178800 |
| H                         | -2.01386600 | -0.66599700 | -1.18971600 | H                        | -1.98324300 | -0.76571600 | -1.27234500 |
| O                         | -1.17716600 | -0.27698400 | 0.68945400  | O                        | -1.13870200 | -0.46246900 | 0.61647600  |
| C                         | -3.52869200 | 0.06754100  | 0.17203700  | C                        | -3.46378600 | -0.02311800 | 0.11395000  |
| H                         | -3.77246200 | -0.92407100 | 0.57350300  | H                        | -3.73326100 | -1.01518900 | 0.49705000  |
| H                         | -3.58212700 | 0.76933500  | 1.01438000  | H                        | -3.49739000 | 0.66273700  | 0.97094700  |
| C                         | -4.55769100 | 0.45462900  | -0.90874300 | C                        | -4.48212300 | 0.41381400  | -0.95718700 |
| H                         | -4.28372300 | 1.43905800  | -1.32013000 | H                        | -4.18149600 | 1.39861200  | -1.34876600 |
| H                         | -4.50446800 | -0.25769600 | -1.74292000 | H                        | -4.44770400 | -0.28222600 | -1.80599100 |
| C                         | -5.96407100 | 0.50229200  | -0.37382800 | C                        | -5.88707100 | 0.48867300  | -0.42218200 |
| H                         | -6.15007300 | 1.22981600  | 0.41908800  | H                        | -6.05437900 | 1.20520900  | 0.38495400  |
| C                         | -6.96823300 | -0.27384000 | -0.79010800 | C                        | -6.91175400 | -0.25242600 | -0.85243700 |
| H                         | -6.77502400 | -0.99846200 | -1.58406400 | H                        | -6.73776900 | -0.96692100 | -1.65991500 |
| C                         | -8.37252000 | -0.23476700 | -0.26101200 | C                        | -8.31465300 | -0.18614600 | -0.32208900 |
| H                         | -9.08913900 | 0.00320400  | -1.05818300 | H                        | -9.02523500 | 0.08443800  | -1.11432100 |
| H                         | -8.67029600 | -1.21033800 | 0.14574700  | H                        | -8.63795800 | -1.16049000 | 0.06797100  |
| H                         | -8.48552800 | 0.51282200  | 0.53109500  | H                        | -8.40801200 | 0.55019000  | 0.48307100  |
| <b>22</b>                 |             |             |             | <b>23</b>                |             |             |             |
| Charge=2 Multiplicity = 3 |             |             |             | Charge=2 Multiplicity =1 |             |             |             |
| Cu                        | -2.06211500 | 0.63535500  | 0.55847200  | Cu                       | -0.41670900 | -1.86672400 | -0.50173200 |
| N                         | -3.44200400 | -0.31801900 | 1.59205900  | N                        | -1.94610000 | -2.26663600 | -1.73390000 |
| N                         | -3.61261900 | 1.16960100  | -0.54040900 | N                        | -0.92267200 | -3.63787800 |             |
| C                         | -5.78761500 | -0.74543900 | 1.77151600  | 0.23734600               |             |             |             |
| C                         | -4.70282500 | -0.16257400 | 1.11807800  | C                        | -3.73061600 | -3.79976500 | -2.17458400 |
| C                         | -4.25691800 | -1.65260500 | 3.39738500  | C                        | -2.61747200 | -3.40374600 | -1.43201800 |

|    |             |             |             |    |             |             |             |
|----|-------------|-------------|-------------|----|-------------|-------------|-------------|
| H  | -6.39369200 | -1.95630600 | 3.44644300  | C  | -3.43320800 | -1.85634000 | -3.56248600 |
| H  | -2.17950900 | -1.11892000 | 3.00095700  | H  | -5.00899300 | -3.30751400 | -3.83611000 |
| H  | -4.04443100 | -2.22955100 | 4.29061900  | H  | -1.72240300 | -0.64641600 | -2.97834700 |
| H  | -6.79680300 | -0.61756800 | 1.39808200  | H  | -3.71487400 | -1.22856200 | -4.40058200 |
| H  | -6.84742700 | 1.91002500  | -2.50766800 | H  | -4.26540500 | -4.71033800 | -1.93196200 |
| C  | -5.93518800 | 1.70380400  | -1.95664900 | H  | -2.28617900 | -6.99702300 |             |
| C  | -4.71253800 | 2.21233200  | -2.39268800 |    | 1.56632700  |             |             |
| C  | -5.97916600 | 0.92092400  | -0.80260000 | C  | -1.89922000 | -6.05321900 |             |
| C  | -3.57080300 | 1.92199300  | -1.65140800 |    | 1.19506100  |             |             |
| H  | -4.63865200 | 2.82185600  | -3.28645600 | C  | -0.74501800 | -5.49421100 |             |
| C  | -4.79715200 | 0.66594000  | -0.10835000 |    | 1.74072500  |             |             |
| H  | -6.92326300 | 0.51626300  | -0.45746300 | C  | -2.55276500 | -5.39048600 |             |
| C  | -5.55926600 | -1.49824300 | 2.92459600  |    | 0.15692100  |             |             |
| H  | -2.59168800 | 2.29106800  | -1.93869000 | C  | -0.29127200 | -4.28060600 |             |
| C  | -3.21853000 | -1.04327800 | 2.69757400  |    | 1.23169100  |             |             |
| O  | -0.63341400 | -0.37167300 | 1.23769200  | H  | -0.20341900 | -5.98235800 |             |
| O  | 0.63344600  | 0.37171900  | 1.23764900  |    | 2.54337200  |             |             |
| Cu | 2.06211600  | -0.63537600 | 0.55840700  | C  | -2.03991200 | -4.17920500 | -0.30844800 |
| N  | 3.44198100  | 0.31800700  | 1.59202900  | H  | -3.44587000 | -5.81926700 | -0.28178400 |
| C  | 4.70282700  | 0.16253800  | 1.11813000  | C  | -4.14579600 | -3.01225900 | -3.24783900 |
| C  | 3.21844300  | 1.04330800  | 2.69750500  | H  | 0.60146200  | -3.79862600 |             |
| C  | 5.78758500  | 0.74540600  | 1.77161700  |    | 1.61452400  |             |             |
| C  | 4.79720500  | -0.66599200 | -0.10828400 | C  | -2.33475000 | -1.51883900 | -2.77634400 |
| C  | 4.25679500  | 1.65265300  | 3.39735300  | O  | 0.00184900  | -0.26113900 | -           |
| H  | 2.17940500  | 1.11895800  | 3.00082100  |    | 1.42725100  |             |             |
| H  | 6.79679600  | 0.61750200  | 1.39825400  | O  | 1.31835500  | 0.28089500  | -           |
| C  | 5.55917200  | 1.49825400  | 2.92465500  |    | 1.09280200  |             |             |
| N  | 3.61269500  | -1.16966100 | -0.54038400 | Cu | 1.24619700  | 2.02603600  | -           |
| C  | 5.97925000  | -0.92096500 | -0.80248800 |    | 0.43528600  |             |             |
| H  | 4.04426100  | 2.22964100  | 4.29054900  | N  | 3.10413300  | 2.47593200  | -           |
| H  | 6.39357100  | 1.95632200  | 3.44654100  |    | 0.91645700  |             |             |
| C  | 3.57092600  | -1.92204300 | -1.65139300 | C  | 3.57653200  | 3.59684200  | -           |
| C  | 5.93531900  | -1.70383300 | -1.95654600 |    | 0.31812300  |             |             |
| H  | 6.92333000  | -0.51630300 | -0.45730900 | C  | 3.87401500  | 1.79023200  | -           |
| C  | 4.71268900  | -2.21236400 | -2.39263600 |    | 1.77354100  |             |             |
| H  | 2.59182700  | -2.29113400 | -1.93871000 | C  | 4.86447200  | 4.05955100  | -           |
| H  | 6.84758000  | -1.91004500 | -2.50753400 |    | 0.58437100  |             |             |
| H  | 4.63883900  | -2.82187500 | -3.28641500 | C  | 2.61349700  | 4.25396500  |             |
| O  | 0.82023100  | -2.05881200 | 0.03865700  |    | 0.59937700  |             |             |
| C  | 0.97621300  | -3.39855400 | 0.59651400  | C  | 5.16975200  | 2.19661000  | -           |
| H  | 1.99954500  | -3.70200800 | 0.35605700  |    | 2.08252300  |             |             |
| C  | -0.03512600 | -4.37010700 | 0.00407100  | H  | 3.41509800  | 0.90726700  | -           |
| H  | 0.07537700  | -5.32534700 | 0.53338800  |    | 2.20636300  |             |             |
| H  | -1.05091600 | -4.01401500 | 0.22918100  | H  | 5.24242400  | 4.95803600  | -           |

|   |             |             |             |            |             |              |
|---|-------------|-------------|-------------|------------|-------------|--------------|
| C | 0.12270200  | -4.59973900 | -1.51096000 | 0.11104700 |             |              |
| H | 0.06045300  | -3.62654600 | -2.02109900 | C          | 5.66852300  | 3.34890000 - |
| H | 1.12541700  | -5.00220600 | -1.71141800 | 1.47697600 |             |              |
| C | -0.91655600 | -5.53722000 | -2.06649300 | N          | 1.40494100  | 3.64147800   |
| H | -1.95285700 | -5.19934100 | -1.99675900 | 0.68372300 |             |              |
| C | -0.65781000 | -6.72715200 | -2.61582600 | C          | 2.88766300  | 5.40091900   |
| H | 0.38107500  | -7.05750300 | -2.68247200 | 1.34432000 |             |              |
| C | -1.68356000 | -7.67248200 | -3.16807300 | H          | 5.76622700  | 1.62216400 - |
| H | -1.50246300 | -7.87227100 | -4.23209700 | 2.78253900 |             |              |
| H | -1.64010500 | -8.64293000 | -2.65706300 | H          | 6.67306200  | 3.69702600 - |
| H | -2.69905900 | -7.27676200 | -3.06374100 | 1.69620100 |             |              |
| H | 0.88034100  | -3.33909200 | 1.68761000  | C          | 0.45896500  | 4.13687100   |
| H | -0.00681000 | -1.61852100 | 0.42378000  | 1.49774300 |             |              |
| O | -0.82030200 | 2.05890200  | 0.03876500  | C          | 1.90264400  | 5.91787600   |
| C | -0.97628100 | 3.39865800  | 0.59655900  | 2.18573000 |             |              |
| H | -1.99961200 | 3.70210600  | 0.35608300  | H          | 3.85298900  | 5.88841000   |
| C | 0.03507600  | 4.37018400  | 0.00409000  | 1.27647200 |             |              |
| H | -0.07545000 | 5.32545000  | 0.53335200  | C          | 0.66747400  | 5.27617500   |
| H | 1.05086200  | 4.01411100  | 0.22924700  | 2.26893400 |             |              |
| C | -0.12270700 | 4.59973700  | -1.51095800 | H          | -0.47774200 | 3.58924800   |
| H | -0.06040800 | 3.62651800  | -2.02104400 | 1.52701900 |             |              |
| H | -1.12542800 | 5.00216200  | -1.71147400 | H          | 2.10207600  | 6.81012500   |
| C | 0.91654300  | 5.53722100  | -2.06649700 | 2.77091300 |             |              |
| H | 1.95285000  | 5.19937100  | -1.99671600 | H          | -0.12032900 | 5.64580500   |
| C | 0.65778800  | 6.72712600  | -2.61588500 | 2.91586300 |             |              |
| H | -0.38110300 | 7.05744900  | -2.68258200 | H          | -0.67952400 | 0.09187700   |
| C | 1.68353400  | 7.67246200  | -3.16812800 | 5.73360900 |             |              |
| H | 1.50246200  | 7.87222500  | -4.23216300 | C          | -0.96367400 | 0.68740700   |
| H | 1.64004600  | 8.64292100  | -2.65714200 | 4.85831600 |             |              |
| H | 2.69903800  | 7.27676600  | -3.06375800 | C          | -2.45325900 | 1.06675900   |
| H | -0.88041900 | 3.33924100  | 1.68765800  | 4.94573800 |             |              |
| H | 0.00677600  | 1.61864900  | 0.42381000  | C          | -0.58347600 | -0.13207100  |
|   |             |             |             | 3.57916400 |             |              |
|   |             |             |             | H          | -0.35704700 | 1.59912600   |
|   |             |             |             | 4.89887700 |             |              |
|   |             |             |             | H          | -2.63198400 | 2.01087100   |
|   |             |             |             | 4.41772900 |             |              |
|   |             |             |             | C          | -3.32814800 | -0.02930500  |
|   |             |             |             | 4.33934500 |             |              |
|   |             |             |             | H          | -2.73091900 | 1.23933400   |
|   |             |             |             | 5.99107200 |             |              |
|   |             |             |             | N          | -1.63085200 | 0.18329400   |
|   |             |             |             | 2.56874300 |             |              |
|   |             |             |             | C          | -3.05321600 | -0.21872900  |

|            |             |              |
|------------|-------------|--------------|
| 2.82290000 |             |              |
| H          | -4.39125200 | 0.20097900   |
| 4.47036800 |             |              |
| H          | -3.15358900 | -0.97115500  |
| 4.87388300 |             |              |
| O          | -1.22930200 | -0.30395000  |
| 1.24744000 |             |              |
| C          | -3.41253600 | -1.65795300  |
| 2.40150800 |             |              |
| H          | -3.32626000 | -1.78833500  |
| 1.31895900 |             |              |
| H          | -2.78668200 | -2.40570800  |
| 2.89416600 |             |              |
| H          | -4.45268100 | -1.86110400  |
| 2.67958000 |             |              |
| C          | -3.92671700 | 0.75937100   |
| 2.01246600 |             |              |
| H          | -4.98833400 | 0.51717300   |
| 2.12985400 |             |              |
| H          | -3.77171300 | 1.79115500   |
| 2.34443800 |             |              |
| H          | -3.68887000 | 0.70200800   |
| 0.94442000 |             |              |
| C          | -0.42040700 | -1.63091800  |
| 3.91635200 |             |              |
| H          | -0.28293200 | -2.21898300  |
| 3.00473500 |             |              |
| H          | 0.46554400  | -1.77495300  |
| 4.54521200 |             |              |
| H          | -1.27459800 | -2.03500500  |
| 4.46449600 |             |              |
| C          | 0.76853700  | 0.38192000   |
| 3.05204000 |             |              |
| H          | 1.15667300  | -0.24048600  |
| 2.24049100 |             |              |
| H          | 0.67290100  | 1.41577400   |
| 2.69944800 |             |              |
| H          | 1.50306200  | 0.37229200   |
| 3.86436100 |             |              |
| H          | -1.21981300 | 0.52317700   |
| 0.73806700 |             |              |
| C          | -1.37935200 | 2.99302200 - |
| 1.49751000 |             |              |
| H          | -1.18024900 | 3.94974800 - |

|                            |
|----------------------------|
| 1.00642400                 |
| H -0.90542800 3.01280200 - |
| 2.48694900                 |
| O -0.71740800 1.98064000 - |
| 0.68254600                 |
| H -0.70149300 1.05924100 - |
| 1.14690600                 |
| C -2.87453000 2.73557300 - |
| 1.60737100                 |
| H -3.04650900 1.76143200 - |
| 2.08556400                 |
| H -3.30185900 2.67540400 - |
| 0.59855900                 |
| C -3.59113400 3.83513800 - |
| 2.41954300                 |
| H -3.40503000 4.80491300 - |
| 1.93259400                 |
| H -3.15177200 3.90103200 - |
| 3.42359200                 |
| C -5.07410000 3.59791400 - |
| 2.52941900                 |
| H -5.62467600 3.56050400 - |
| 1.58729200                 |
| C -5.73901400 3.45137400 - |
| 3.67883800                 |
| H -5.18116300 3.50406400 - |
| 4.61646700                 |
| C -7.21961700 3.24174700 - |
| 3.80530100                 |
| H -7.68259000 4.05675900 - |
| 4.37631100                 |
| H -7.44569700 2.31470600 - |
| 4.34861900                 |
| H -7.70848200 3.19355500 - |
| 2.82691300                 |
| C 2.34954900 -2.92664800 - |
| 0.77433000                 |
| H 1.94447700 -3.92599200 - |
| 0.59315400                 |
| H 2.22918900 -2.69691700 - |
| 1.84074800                 |
| O 1.52423500 -2.01249400   |
| 0.00263300                 |
| H 1.75852400 -1.07633900 - |



|                                                                                                                                                                                                                                                                                                                                                                                                                                                                 |                                                                                                                                                                                                                                                                                                                                                                                                                                                                                                                                                                                                                                                |
|-----------------------------------------------------------------------------------------------------------------------------------------------------------------------------------------------------------------------------------------------------------------------------------------------------------------------------------------------------------------------------------------------------------------------------------------------------------------|------------------------------------------------------------------------------------------------------------------------------------------------------------------------------------------------------------------------------------------------------------------------------------------------------------------------------------------------------------------------------------------------------------------------------------------------------------------------------------------------------------------------------------------------------------------------------------------------------------------------------------------------|
|                                                                                                                                                                                                                                                                                                                                                                                                                                                                 | 0.27580700<br>C 3.80935900 -2.84319100 -<br>0.35185100<br>H 4.18346000 -1.82563300 -<br>0.53035100<br>H 3.87767200 -3.01999700<br>0.72911500<br>C 4.69460200 -3.85323800 -<br>1.11086900<br>H 4.30360400 -4.86619000 -<br>0.92853600<br>H 4.61453300 -3.67890100 -<br>2.19212700<br>C 6.13919300 -3.78384800 -<br>0.69152000<br>H 6.34267300 -3.99074600<br>0.36107600<br>C 7.15851100 -3.50330900 -<br>1.50809200<br>H 6.94640500 -3.30962500 -<br>2.56207800<br>C 8.60395100 -3.45207200 -<br>1.10699000<br>H 9.19273300 -4.19043900 -<br>1.66637900<br>H 9.04448000 -2.47081800 -<br>1.32831400<br>H 8.73577800 -3.65279600 -<br>0.03892200 |
| <b>23</b><br>Charge=2 Multiplicity =3<br>Cu -0.36676700 -1.87615000 -0.49869800<br>N -1.91028700 -2.32261100 -1.70051100<br>N -0.82686000 -3.64753400 0.26973500<br>C -3.66955700 -3.89748700 -2.09320500<br>C -2.55500200 -3.46749100 -1.37189900<br>C -3.42768500 -1.97219300 -3.51669000<br>H -4.97847700 -3.45772400 -3.74574500<br>H -1.73283000 -0.72080700 -2.97629500<br>H -3.73169500 -1.36437600 -4.36166800<br>H -4.18223500 -4.81470900 -1.82911600 | <b>26</b><br>Charge=2 Multiplicity =3<br>Cu 2.19411400 -0.22725000 0.11676500<br>N 3.24170100 0.98897200 1.32207200<br>N 3.75761100 0.17801100 -1.10785200<br>C 5.22899500 2.30069700 1.55216000<br>C 4.39909800 1.46231800 0.80547100<br>C 3.65244700 2.15992500 3.36591500<br>H 5.48857700 3.29478400 3.44464400<br>H 1.92181100 0.92179700 2.88941300<br>H 3.32703000 2.40878000 4.37012000<br>H 6.15767000 2.67665900 1.13932600                                                                                                                                                                                                           |

|    |             |             |             |    |             |             |             |
|----|-------------|-------------|-------------|----|-------------|-------------|-------------|
| H  | -2.11430500 | -7.00363300 | 1.67984000  | H  | 6.87903300  | 1.15479100  | -3.16513000 |
| C  | -1.74852100 | -6.06074700 | 1.28548200  | C  | 6.00093100  | 0.87774900  | -2.59012200 |
| C  | -0.59185700 | -5.47659200 | 1.79856000  | C  | 5.04053200  | 0.02158900  | -3.12616500 |
| C  | -2.43209300 | -5.42462600 | 0.25002700  | C  | 5.82614100  | 1.37310000  | -1.29892100 |
| C  | -0.16656700 | -4.26480000 | 1.26139700  | C  | 3.93596400  | -0.30682200 | -2.34515600 |
| H  | -0.02709900 | -5.94386500 | 2.59765900  | H  | 5.14283500  | -0.38975000 | -4.12438000 |
| C  | -1.94607300 | -4.21421000 | -0.24547900 | C  | 4.69032800  | 1.00474700  | -0.57559300 |
| H  | -3.32774500 | -5.87330200 | -0.16293300 | H  | 6.56994900  | 2.03187700  | -0.86667900 |
| C  | -4.11388100 | -3.13600400 | -3.17363600 | C  | 4.85103500  | 2.64922000  | 2.84850400  |
| H  | 0.72608400  | -3.76347000 | 1.61867000  | H  | 3.16761000  | -0.98464700 | -2.70010700 |
| C  | -2.32615400 | -1.60056900 | -2.75045400 | C  | 2.87210600  | 1.33115400  | 2.56368600  |
| O  | 0.01106900  | -0.28505700 | -1.47009800 | O  | 0.63202000  | 0.20372900  | 0.96551000  |
| O  | 1.31090100  | 0.30212900  | -1.14363900 | O  | -0.47634100 | -0.65726300 | 0.84635400  |
| Cu | 1.17149400  | 2.03267600  | -0.45137800 | Cu | -1.99711500 | 0.04969300  | 0.09042700  |
| N  | 3.01214900  | 2.55576900  | -0.93417500 | N  | -3.19724200 | -1.07876300 | 1.23023300  |
| C  | 3.44021300  | 3.69540200  | -0.33822600 | C  | -4.42127900 | -1.33042900 | 0.71029800  |
| C  | 3.80666900  | 1.90113400  | -1.79278700 | C  | -2.86306700 | -1.57190200 | 2.43074900  |
| C  | 4.70805300  | 4.20913800  | -0.60732800 | C  | -5.35859300 | -2.08679100 | 1.41562100  |
| C  | 2.45276800  | 4.31473600  | 0.57966100  | C  | -4.65408800 | -0.73995200 | -0.63080600 |
| C  | 5.08451600  | 2.35875800  | -2.10487400 | C  | -3.74874300 | -2.33383300 | 3.18901900  |
| H  | 3.38191900  | 1.00089700  | -2.22512300 | H  | -1.85560600 | -1.33961400 | 2.75881300  |
| H  | 5.05051500  | 5.12270900  | -0.13590500 | H  | -6.34037500 | -2.28427400 | 1.00188200  |
| C  | 5.53820300  | 3.53030000  | -1.50087800 | C  | -5.01733000 | -2.59028100 | 2.67094700  |
| N  | 1.27009000  | 3.65416800  | 0.66719700  | N  | -3.61290200 | -0.02579700 | -1.12538800 |
| C  | 2.68138900  | 5.47367900  | 1.32152100  | C  | -5.83350400 | -0.89684700 | -1.36092900 |
| H  | 5.70187300  | 1.80827000  | -2.80603600 | H  | -3.44807300 | -2.71144100 | 4.16021500  |
| H  | 6.52761100  | 3.91807800  | -1.72236100 | H  | -5.73680200 | -3.17661400 | 3.23408800  |
| C  | 0.30652800  | 4.11182800  | 1.48271800  | C  | -3.72031000 | 0.54426800  | -2.33510200 |
| C  | 1.67755100  | 5.95219900  | 2.16341100  | C  | -5.93774000 | -0.30959600 | -2.62104600 |
| H  | 3.62601000  | 5.99975600  | 1.25069500  | H  | -6.66301000 | -1.46723400 | -0.96003000 |
| C  | 0.46994000  | 5.26045400  | 2.25087300  | C  | -4.86261400 | 0.42318900  | -3.12135000 |
| H  | -0.60574100 | 3.52460400  | 1.51757500  | H  | -2.85824700 | 1.11368500  | -2.66384300 |
| H  | 1.84141100  | 6.85330700  | 2.74605400  | H  | -6.84792800 | -0.42454200 | -3.20136500 |
| H  | -0.33080600 | 5.59881600  | 2.89901900  | H  | -4.90425700 | 0.89505100  | -4.09693400 |
| H  | -0.51495900 | 0.15460000  | 5.71440400  | H  | -1.70088100 | 5.10974800  | 2.35990000  |
| C  | -0.84469100 | 0.72556200  | 4.83873500  | C  | -1.22346000 | 4.76284200  | 1.43740200  |
| C  | -2.33973400 | 1.07203000  | 4.97000800  | C  | -1.21276600 | 5.89433200  | 0.38943700  |
| C  | -0.48739700 | -0.10877000 | 3.56339000  | C  | -1.94417300 | 3.46699000  | 1.00649400  |
| H  | -0.25991800 | 1.65241800  | 4.84065700  | H  | -0.19730700 | 4.49411900  | 1.71351800  |
| H  | -2.55383700 | 2.01210700  | 4.44795600  | H  | -0.31118200 | 6.49683800  | 0.53862500  |
| C  | -3.21119300 | -0.04071600 | 4.38947800  | C  | -1.27901000 | 5.37641500  | -1.06150000 |
| H  | -2.59066600 | 1.23973500  | 6.02283600  | H  | -2.05515600 | 6.57314500  | 0.55512300  |
| N  | -1.56078300 | 0.18646300  | 2.57451900  | N  | -1.35631000 | 3.02965400  | -0.30712100 |
| C  | -2.97132400 | -0.23332000 | 2.86712400  | C  | -0.69093400 | 3.96870000  | -1.27696500 |

|   |             |             |             |   |             |             |             |
|---|-------------|-------------|-------------|---|-------------|-------------|-------------|
| H | -4.27409500 | 0.17432800  | 4.54561700  | H | -0.75291100 | 6.06261100  | -1.73360100 |
| H | -3.00987100 | -0.97732100 | 4.92349900  | H | -2.31904900 | 5.35982900  | -1.40660900 |
| O | -1.18408100 | -0.30668500 | 1.24749900  | O | -1.37773200 | 1.78227100  | -0.66009500 |
| C | -3.32214000 | -1.67913500 | 2.46135500  | C | -0.99521800 | 3.50482800  | -2.70998400 |
| H | -3.26970300 | -1.81185900 | 1.37695600  | H | -0.55309200 | 2.52897600  | -2.92154100 |
| H | -2.66930200 | -2.41585900 | 2.93517400  | H | -2.07468100 | 3.45348400  | -2.88655500 |
| H | -4.34937500 | -1.89703700 | 2.77405400  | H | -0.57585600 | 4.23203200  | -3.41185100 |
| C | -3.87880600 | 0.72890800  | 2.07522200  | C | 0.83269800  | 3.92271400  | -1.03413100 |
| H | -4.93359800 | 0.47340200  | 2.22181600  | H | 1.33929400  | 4.52027300  | -1.79931400 |
| H | -3.72924700 | 1.76457400  | 2.39753900  | H | 1.11009700  | 4.32255100  | -0.05566300 |
| H | -3.66936200 | 0.66879000  | 1.00135900  | H | 1.19210500  | 2.89112900  | -1.10234400 |
| C | -0.30532800 | -1.60167500 | 3.91730600  | C | -3.46159100 | 3.68568500  | 0.82917800  |
| H | -0.18366400 | -2.20124100 | 3.01109500  | H | -3.94247200 | 2.78269200  | 0.43835000  |
| H | 0.59578100  | -1.72997800 | 4.52774200  | H | -3.90919500 | 3.91336100  | 1.80236500  |
| H | -1.14343500 | -2.00495400 | 4.48987000  | H | -3.68863100 | 4.51364900  | 0.15331200  |
| C | 0.84942000  | 0.40610500  | 3.00009500  | C | -1.68572700 | 2.38813200  | 2.07111400  |
| H | 1.22717000  | -0.22848000 | 2.19315600  | H | -2.36867900 | 1.53886500  | 1.98001900  |
| H | 0.73885300  | 1.43224900  | 2.63030400  | H | -0.65980600 | 2.01406800  | 2.02483300  |
| H | 1.59954600  | 0.41756700  | 3.79805600  | H | -1.86299100 | 2.82587100  | 3.05841900  |
| H | -1.23521500 | 0.51096600  | 0.72419600  | H | 1.14517200  | -5.43411400 | 2.09288700  |
| C | -1.47953900 | 2.91278600  | -1.51754000 | C | 0.80469500  | -4.89299200 | 1.20384100  |
| H | -1.30767500 | 3.87443600  | -1.02580300 | C | 0.54000200  | -5.88240800 | 0.04941600  |
| H | -1.00640200 | 2.94665800  | -2.50693900 | C | 1.84758900  | -3.80111500 | 0.90051200  |
| O | -0.78915100 | 1.91790400  | -0.70423400 | H | -0.12639600 | -4.39315800 | 1.49516000  |
| H | -0.73202900 | 1.00057600  | -1.17972300 | H | -0.49078700 | -6.24256000 | 0.12987100  |
| C | -2.96692900 | 2.61342300  | -1.62768800 | C | 0.78580700  | -5.27000400 | -1.34482900 |
| H | -3.11161100 | 1.63289900  | -2.10174700 | H | 1.17387600  | -6.76813300 | 0.15587100  |
| H | -3.39348300 | 2.54603300  | -0.61901000 | N | 1.42894000  | -3.09802200 | -0.36335400 |
| C | -3.71349800 | 3.68892100  | -2.44507000 | C | 0.57844700  | -3.74312900 | -1.42922900 |
| H | -3.55207700 | 4.66635000  | -1.96468800 | H | 0.12419700  | -5.73388700 | -2.08434900 |
| H | -3.27803900 | 3.75986600  | -3.45044800 | H | 1.80628100  | -5.48796600 | -1.67868100 |
| C | -5.18995600 | 3.41184400  | -2.54996300 | O | 2.04051300  | -2.00440800 | -0.67431600 |
| H | -5.73777500 | 3.36873700  | -1.60645400 | C | 1.03283800  | -3.23887100 | -2.80619300 |
| C | -5.85270100 | 3.23643800  | -3.69658400 | H | 0.83858900  | -2.17096500 | -2.93174800 |
| H | -5.29810400 | 3.29476100  | -4.63579900 | H | 2.09890800  | -3.42561700 | -2.96602600 |
| C | -7.32746500 | 2.98636700  | -3.81791300 | H | 0.47484400  | -3.77957900 | -3.57665900 |
| H | -7.81299500 | 3.78330900  | -4.39564400 | C | -0.89491400 | -3.34838600 | -1.20009100 |
| H | -7.52989100 | 2.04852900  | -4.35195100 | H | -1.50065600 | -3.73429900 | -2.02721100 |
| H | -7.81299900 | 2.93459800  | -2.83805200 | H | -1.29583700 | -3.75134500 | -0.26715700 |
| C | 2.41921900  | -2.87515000 | -0.79196200 | H | -0.98597900 | -2.25995600 | -1.16457400 |
| H | 2.03766100  | -3.88102400 | -0.59634700 | C | 3.26201200  | -4.38347400 | 0.69193400  |
| H | 2.28287400  | -2.65911300 | -1.85922600 | H | 3.95783900  | -3.59601300 | 0.38729800  |
| O | 1.58278300  | -1.97016300 | -0.01560800 | H | 3.61725200  | -4.80787600 | 1.63657800  |
| H | 1.78976900  | -1.03282300 | -0.31313300 | H | 3.28431000  | -5.17459100 | -0.06128300 |

|                          |             |             |             |   |            |             |            |
|--------------------------|-------------|-------------|-------------|---|------------|-------------|------------|
| C                        | 3.88098000  | -2.75565000 | -0.38530100 | C | 1.86886800 | -2.78535400 | 2.05398400 |
| H                        | 4.23043100  | -1.73158100 | -0.57605400 | H | 2.70137500 | -2.08168600 | 1.96277000 |
| H                        | 3.96403200  | -2.92160400 | 0.69636200  | H | 0.93253800 | -2.22409400 | 2.10285000 |
| C                        | 4.78130900  | -3.75186300 | -1.14487700 | H | 2.00857700 | -3.32899900 | 2.99362900 |
| H                        | 4.41299600  | -4.77165000 | -0.95359800 |   |            |             |            |
| H                        | 4.68973400  | -3.58558600 | -2.22644500 |   |            |             |            |
| C                        | 6.22706000  | -3.64977800 | -0.73634500 |   |            |             |            |
| H                        | 6.44231900  | -3.84753000 | 0.31567100  |   |            |             |            |
| C                        | 7.23447400  | -3.35112500 | -1.56123200 |   |            |             |            |
| H                        | 7.01115900  | -3.16656000 | -2.61450900 |   |            |             |            |
| C                        | 8.68114300  | -3.26700700 | -1.17016100 |   |            |             |            |
| H                        | 9.28213900  | -3.99420300 | -1.73118300 |   |            |             |            |
| H                        | 9.09845400  | -2.27706000 | -1.39764900 |   |            |             |            |
| H                        | 8.82443800  | -3.46123700 | -0.10238000 |   |            |             |            |
| <b>27</b>                |             |             |             |   |            |             |            |
| Charge=2 Multiplicity =3 |             |             |             |   |            |             |            |
| Cu                       | 2.03111400  | -0.11295100 | 0.56834600  |   |            |             |            |
| N                        | 2.64466300  | 0.74890000  | 2.31109100  |   |            |             |            |
| N                        | 4.00208300  | 0.10168400  | 0.17153900  |   |            |             |            |
| C                        | 4.49950600  | 1.71904000  | 3.47108100  |   |            |             |            |
| C                        | 3.95244900  | 1.08848900  | 2.35166000  |   |            |             |            |
| C                        | 2.32847000  | 1.64564100  | 4.50470400  |   |            |             |            |
| H                        | 4.08446900  | 2.48823200  | 5.43901500  |   |            |             |            |
| H                        | 0.81823100  | 0.71297600  | 3.22973500  |   |            |             |            |
| H                        | 1.65844500  | 1.84550100  | 5.33386100  |   |            |             |            |
| H                        | 5.54841600  | 1.98896300  | 3.50273300  |   |            |             |            |
| H                        | 7.78433200  | 0.73183100  | -0.32760600 |   |            |             |            |
| C                        | 6.72265300  | 0.55146900  | -0.19050300 |   |            |             |            |
| C                        | 5.97548500  | -0.08919900 | -1.17715800 |   |            |             |            |
| C                        | 6.09071400  | 0.95482000  | 0.98383800  |   |            |             |            |
| C                        | 4.61747600  | -0.29691100 | -0.95194300 |   |            |             |            |
| H                        | 6.42991400  | -0.42498400 | -2.10287000 |   |            |             |            |
| C                        | 4.72336300  | 0.71672000  | 1.14073800  |   |            |             |            |
| H                        | 6.66030300  | 1.44521600  | 1.76416100  |   |            |             |            |
| C                        | 3.67526800  | 2.00013300  | 4.55985000  |   |            |             |            |
| H                        | 3.99160500  | -0.80083600 | -1.67825900 |   |            |             |            |
| C                        | 1.85149100  | 1.02032000  | 3.35489100  |   |            |             |            |
| O                        | 0.25672900  | 0.00343900  | 1.12712200  |   |            |             |            |
| O                        | -0.59250600 | -1.05462300 | 0.74181300  |   |            |             |            |
| Cu                       | -2.20581300 | -0.58618600 | 0.02525000  |   |            |             |            |
| N                        | -3.05141300 | -2.34547400 | 0.50947600  |   |            |             |            |
| C                        | -4.08982200 | -2.70765700 | -0.27794100 |   |            |             |            |
| C                        | -2.66195400 | -3.14453500 | 1.51193900  |   |            |             |            |

|   |             |             |             |
|---|-------------|-------------|-------------|
| C | -4.78568500 | -3.89686700 | -0.04998300 |
| C | -4.40009700 | -1.75053600 | -1.36887900 |
| C | -3.30875500 | -4.34460100 | 1.79725700  |
| H | -1.80773600 | -2.78972100 | 2.07867700  |
| H | -5.62144500 | -4.18351500 | -0.67724500 |
| C | -4.39144200 | -4.72117600 | 1.00318700  |
| N | -3.60976700 | -0.64706500 | -1.40633000 |
| C | -5.40797400 | -1.94895300 | -2.31430400 |
| H | -2.97216300 | -4.96186600 | 2.62315900  |
| H | -4.92484200 | -5.64659200 | 1.19719500  |
| C | -3.79664800 | 0.26015400  | -2.37756800 |
| C | -5.59981400 | -1.00116100 | -3.31809100 |
| H | -6.03595800 | -2.83108900 | -2.27679100 |
| C | -4.77715600 | 0.12290100  | -3.35582600 |
| H | -3.13018000 | 1.11392000  | -2.36226400 |
| H | -6.37847000 | -1.14416800 | -4.06080600 |
| H | -4.88714000 | 0.88023700  | -4.12424000 |
| H | 1.16150400  | 2.63869700  | -5.21922900 |
| C | 1.20761700  | 3.08590100  | -4.21992000 |
| C | 2.51652800  | 3.88542200  | -4.05090700 |
| C | 1.02751100  | 1.96014700  | -3.18346300 |
| H | 0.34257900  | 3.75518000  | -4.15140400 |
| H | 2.35960700  | 4.90296800  | -4.42372100 |
| C | 2.99807000  | 3.92128200  | -2.58521600 |
| H | 3.30660900  | 3.45687700  | -4.67693400 |
| N | 0.96217800  | 2.59779100  | -1.82945300 |
| C | 1.85297200  | 3.79904100  | -1.55572400 |
| H | 3.54151300  | 4.85341000  | -2.39117300 |
| H | 3.71780100  | 3.11544800  | -2.40005400 |
| O | 1.13290900  | 1.54554600  | -0.83773200 |
| C | 2.45764300  | 3.73705600  | -0.14688400 |
| H | 1.68807200  | 3.63684200  | 0.62463600  |
| H | 3.16262500  | 2.90947200  | -0.04173200 |
| H | 2.99960900  | 4.67018400  | 0.03967100  |
| C | 0.94412900  | 5.04744700  | -1.61938800 |
| H | 1.53063300  | 5.95328200  | -1.42732400 |
| H | 0.46036100  | 5.16491900  | -2.59162800 |
| H | 0.15777300  | 4.98109600  | -0.86122300 |
| C | 2.13748500  | 0.89788400  | -3.34354600 |
| H | 1.97890000  | 0.07076300  | -2.64766400 |
| H | 2.10814400  | 0.49452600  | -4.36194000 |
| H | 3.13814800  | 1.30317200  | -3.17870000 |
| C | -0.32957900 | 1.27300800  | -3.41899800 |
| H | -0.51037800 | 0.50702300  | -2.65611900 |

|   |             |             |             |
|---|-------------|-------------|-------------|
| H | -1.13697700 | 2.01221900  | -3.37974000 |
| H | -0.35563700 | 0.78563300  | -4.40025600 |
| H | 0.29609600  | 1.51736300  | -0.33812800 |
| H | 1.85220100  | -5.62416700 | 1.96851500  |
| C | 1.55688700  | -5.12775400 | 1.03784300  |
| C | 1.72445600  | -6.09203000 | -0.15469400 |
| C | 2.35761200  | -3.81155700 | 0.93845000  |
| H | 0.50043600  | -4.85923600 | 1.15900900  |
| H | 0.79778100  | -6.66278300 | -0.27488800 |
| C | 2.08476700  | -5.37186200 | -1.46940900 |
| H | 2.50283900  | -6.83054200 | 0.06150800  |
| N | 1.99088400  | -3.15739600 | -0.36382600 |
| C | 1.56578100  | -3.92576900 | -1.58553000 |
| H | 1.69544900  | -5.93186600 | -2.32644000 |
| H | 3.17240900  | -5.35117100 | -1.59937600 |
| O | 2.02846300  | -1.87176300 | -0.49453100 |
| C | 2.18358200  | -3.26649000 | -2.82889400 |
| H | 1.79216900  | -2.26091500 | -2.99014300 |
| H | 3.27416100  | -3.21243400 | -2.74377300 |
| H | 1.94593100  | -3.87462300 | -3.70730900 |
| C | 0.02663100  | -3.86358200 | -1.67625000 |
| H | -0.30020800 | -4.30362200 | -2.62452300 |
| H | -0.45495900 | -4.41286800 | -0.86248600 |
| H | -0.30570300 | -2.82237500 | -1.63331200 |
| C | 3.88222400  | -4.05208500 | 0.97158700  |
| H | 4.41909500  | -3.11035000 | 0.81798300  |
| H | 4.16477800  | -4.44778100 | 1.95307100  |
| H | 4.21523300  | -4.76512800 | 0.21414700  |
| C | 1.95860500  | -2.89827100 | 2.10713200  |
| H | 2.65237600  | -2.06217400 | 2.22526100  |
| H | 0.94691800  | -2.50434000 | 1.98093000  |
| H | 2.00233800  | -3.48130100 | 3.03287900  |
| H | -4.56111300 | 5.15956000  | 0.78409000  |
| C | -4.51618400 | 4.10353500  | 1.07064700  |
| C | -4.88314100 | 3.93666600  | 2.55980700  |
| C | -3.12459900 | 3.56998800  | 0.67594700  |
| H | -5.25609300 | 3.59165900  | 0.44372100  |
| H | -5.96536700 | 3.79307300  | 2.63938700  |
| C | -4.13700500 | 2.77187200  | 3.23841900  |
| H | -4.66282300 | 4.85518500  | 3.11277300  |
| N | -3.05472000 | 2.12786500  | 1.10226300  |
| C | -3.77006500 | 1.58948000  | 2.31578200  |
| H | -4.73765500 | 2.36719600  | 4.06012700  |
| H | -3.21269100 | 3.13603600  | 3.69916200  |

|   |             |             |             |
|---|-------------|-------------|-------------|
| O | -2.19877400 | 1.37623600  | 0.48164200  |
| C | -2.82732900 | 0.64613400  | 3.07955900  |
| H | -2.56138000 | -0.23968600 | 2.50169700  |
| H | -1.89965900 | 1.15780000  | 3.35097600  |
| H | -3.32679900 | 0.32059900  | 3.99739900  |
| C | -5.02987400 | 0.83148200  | 1.84880300  |
| H | -5.54320500 | 0.40890200  | 2.71884500  |
| H | -5.73371100 | 1.48412100  | 1.32511300  |
| H | -4.76459800 | 0.00637400  | 1.18096600  |
| C | -1.97250300 | 4.34739500  | 1.34841000  |
| H | -1.01348400 | 3.87730800  | 1.11070800  |
| H | -1.95686200 | 5.37206000  | 0.96297000  |
| H | -2.07363800 | 4.40158500  | 2.43447300  |
| C | -2.96186000 | 3.64728100  | -0.84872700 |
| H | -1.98102400 | 3.29145400  | -1.17228400 |
| H | -3.74415200 | 3.07151400  | -1.35361900 |
| H | -3.06675400 | 4.69166200  | -1.15817400 |
